# Supplementary material for: The temporal relationship between drug supply indicators: an audit of international government surveillance systems
Source: PubMed Central journal article supplement — BMJ Open. 2013 Aug 17;3(9):e003077. doi: 10.1136/bmjopen-2013-003077 (PMC3787412; doi:10.1136/bmjopen-2013-003077), 2013-08-17
Supplement: bmjopen-2013-003077.draft_revisions.pdf [file bmjopen-2013-003077.draft_revisions.pdf]

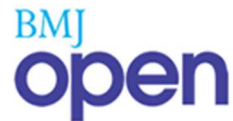

**Assessing the impact of drug law enforcement on illegal  
drug supply: An audit of international government  
surveillance systems**

|                                 |                                                                                                                                                                                                                                                                                                                                                                                                                        |
|---------------------------------|------------------------------------------------------------------------------------------------------------------------------------------------------------------------------------------------------------------------------------------------------------------------------------------------------------------------------------------------------------------------------------------------------------------------|
| Journal:                        | <i>BMJ Open</i>                                                                                                                                                                                                                                                                                                                                                                                                        |
| Manuscript ID:                  | bmjopen-2013-003077                                                                                                                                                                                                                                                                                                                                                                                                    |
| Article Type:                   | Research                                                                                                                                                                                                                                                                                                                                                                                                               |
| Date Submitted by the Author:   | 18-Apr-2013                                                                                                                                                                                                                                                                                                                                                                                                            |
| Complete List of Authors:       | Werb, Dan; BC Centre for Excellence in HIV/AIDS, Urban Health Research Initiative<br>Kerr, Thomas; BC Centre for Excellence in HIV/AIDS, Urban Health Research Initiative<br>Nosyk, Bohdan; BC Centre for Excellence in HIV/AIDS,<br>Strathdee, Steffanie; University of California San Diego, Medicine<br>Montaner, Julio; BC Centre for Excellence in HIV/AIDS,<br>Wood, Evan; BC Centre for Excellence in HIV/AIDS, |
| <b>Primary Subject Heading</b>: | Public health                                                                                                                                                                                                                                                                                                                                                                                                          |
| Secondary Subject Heading:      | Health policy, Public health                                                                                                                                                                                                                                                                                                                                                                                           |
| Keywords:                       | AUDIT, Public health < INFECTIOUS DISEASES, PUBLIC HEALTH                                                                                                                                                                                                                                                                                                                                                              |
|                                 |                                                                                                                                                                                                                                                                                                                                                                                                                        |

SCHOLARONE™  
Manuscripts

Werb et al. Effectiveness of enforcement-based supply reduction...

# Assessing the impact of drug law enforcement on illegal drug supply: An audit of international government surveillance systems

Dan Werb; Thomas Kerr; Bohdan Nosyk; Steffanie Strathdee; Julio Montaner; Evan Wood

**Dan Werb**, Senior Research Assistant, Urban Health Research Initiative, BC Centre for Excellence in HIV/AIDS, Vancouver, Canada, 608 – 1081 Burrard Street, Vancouver, B.C., Canada, V6Z 1Y6

**Thomas Kerr**, Director, Urban Health Research Initiative, BC Centre for Excellence in HIV/AIDS, Vancouver, Canada, 608 – 1081 Burrard Street, Vancouver, B.C., Canada, V6Z 1Y6

**Bohdan Nosyk**, Research Scientist, BC Centre for Excellence in HIV/AIDS, Vancouver, Canada, 608 – 1081 Burrard Street, Vancouver, B.C., Canada, V6Z 1Y6

**Steffanie Strathdee**, Associate Dean of Global Health Sciences, University of California San Diego, Institute of the Americas, 10111 N. Torrey Rd., La Jolla, CA, USA, 92093-0507

**Julio Montaner**, Director, BC Centre for Excellence in HIV/AIDS, Vancouver, Canada, 608 – 1081 Burrard Street, Vancouver, B.C., Canada, V6Z 1Y6

**Evan Wood**, Director, Urban Health Research Initiative, BC Centre for Excellence in HIV/AIDS, Vancouver, Canada, 608 – 1081 Burrard Street, Vancouver, B.C., Canada, V6Z 1Y6

**Send correspondence to:** Evan Wood, MD, PhD ABIM FRCPC  
Professor of Medicine, University of British Columbia  
BC Centre for Excellence in HIV/AIDS  
608-1081 Burrard Street, Vancouver, B.C. V6Z 1Y6  
CANADA  
Tel: (604) 806-9116  
Fax: (604) 806-9044  
Email: uhri-ew@cfenet.ubc.ca

**Word Count:** 2,155

**Tables:** 1

**Figures:** 4

*Werb et al. Effectiveness of enforcement-based supply reduction...*

**Revised:** April 17, 2013

**Printed:** April 17, 2013

For peer review only

1  
2  
3  
4  
5  
6  
7  
8  
9  
10  
11  
12  
13  
14  
15  
16  
17  
18  
19  
20  
21  
22  
23  
24  
25  
26  
27  
28  
29  
30  
31  
32  
33  
34  
35  
36  
37  
38  
39  
40  
41  
42  
43  
44  
45  
46  
47  
48  
49  
50  
51  
52  
53  
54  
55  
56  
57  
58  
59  
60

**ABSTRACT**

**Objectives:** Illegal drug use continues to be a major threat to community health and safety. We used international drug surveillance databases to assess the impact of enforcement-based supply reduction strategies on long-term estimates of illegal drug price and purity.

**Design:** We systematically searched for longitudinal measures of illegal drug supply indicators to assess the long-term impact of enforcement-based supply reduction interventions.

**Setting:** Data from identified illegal drug surveillance systems were analysed using an *a priori* defined protocol in which we sought to present annual estimates beginning in 1990. Data were then subjected to trend analyses.

**Main Outcome Measures:** Data were obtained from government surveillance systems assessing price, purity, and/or seizures of illegal drugs; systems with at least 10 years of longitudinal data assessing price, purity/potency, or seizures were included.

**Results:** We identified 7 surveillance systems with longitudinal measures of price or purity/potency that met eligibility criteria. In the United States, the average inflation- and purity-adjusted prices of heroin, cocaine, and cannabis decreased by 81%, 80% and 86% respectively between 1990 and 2007, whereas average purity increased by 60%, 11%, and 161% respectively. Similar trends were observed in Europe, where during the same period the average inflation-adjusted price of opiates and cocaine decreased by 74% and 51% respectively. In Australia, the average inflation-adjusted price of cocaine decreased 14%, while the inflation-adjusted price of heroin and cannabis both decreased 49% between 2000 and 2010. During this time, seizures of these drugs in major production regions and major domestic markets generally increased.

**Conclusions:** With few exceptions and despite increasing investments in enforcement-based supply reduction efforts aimed at disrupting global drug supply, illegal drug prices have generally decreased while drug purity has generally increased since 1990. These findings suggest that expanding efforts at controlling the global illegal drug market through law enforcement are failing.

Word count: 300

1  
2  
3  
4  
5  
6  
7  
8  
9  
10  
11  
12  
13  
14  
15  
16  
17  
18  
19  
20  
21  
22  
23  
24  
25  
26  
27  
28  
29  
30  
31  
32  
33  
34  
35  
36  
37  
38  
39  
40  
41  
42  
43  
44  
45  
46  
47  
48  
49  
50  
51  
52  
53  
54  
55  
56  
57  
58  
59  
60

Werb et al. Effectiveness of enforcement-based supply reduction...

## Article Summary

### Article focus

- Studies have demonstrated that illegal drug use remains a threat to community health and safety.
- However, less is known regarding the long-term impact of efforts to reduce the overall supply of illegal drugs.

### Key messages

- Using longitudinal governmental surveillance data, this study demonstrates that over the past two decades, the supply of major illegal drugs has increased, as measured through a general decline in the price, and a general increase in the purity of illegal drugs in a variety of settings.

### Strengths and limitations

- This study was limited by the quality and consistency of surveillance data on illegal drug supply
- This study presents over two decades of data on trends in illegal drug supply in a variety of settings, including consumer and export drug markets

Werb et al. Effectiveness of enforcement-based supply reduction...

## OBJECTIVES

The United Nations (UN) recently estimated that the global illegal drug trade is worth at least \$350 billion USD annually,<sup>1</sup> and illegal drug use remains a major threat to community health and safety.<sup>2, 3</sup> In addition to the range of harms associated with the direct health effects of drugs, including fatal overdose,<sup>4, 5</sup> illegal drug use is also one of the key global drivers of blood borne disease transmission, in particular human immunodeficiency virus (HIV) infection.<sup>6, 7</sup> Illegal drug markets also contribute to community concerns such as high rates of violence in settings where the trade proliferates.<sup>8</sup>

In response to the health and social concerns associated with illegal drug use, several UN conventions were created to criminalize the possession, consumption, and manufacture of illegal drugs.<sup>9-11</sup> Accordingly, over the last several decades, most national drug control strategies have prioritized drug law enforcement interventions to reduce drug supply, despite recent calls by experts to explore alternative models of drug control.<sup>12, 13</sup> While some unintended consequences of this approach, such as record incarceration rates, have been well-documented,<sup>14-16</sup> the impact of enforcement-based interventions on drug supply, measured through indicators of drug price, purity/potency and seizures, has not been subjected to systematic evaluation. The present study therefore sought to systematically identify international data from publicly available illegal drug surveillance systems to assess the impact of enforcement-based supply reduction strategies on long-term estimates of illegal drug supply.

## DESIGN

### ***Outcomes of interest***

1  
2  
3  
4  
5  
6  
7  
8  
9  
10  
11  
12  
13  
14  
15  
16  
17  
18  
19  
20  
21  
22  
23  
24  
25  
26  
27  
28  
29  
30  
31  
32  
33  
34  
35  
36  
37  
38  
39  
40  
41  
42  
43  
44  
45  
46  
47  
48  
49  
50  
51  
52  
53  
54  
55  
56  
57  
58  
59  
60

Werb et al. Effectiveness of enforcement-based supply reduction...

The primary outcomes of interest were long-term patterns of illegal drug supply, measured through indicators of price and purity/potency for three major illegal drugs: cannabis, cocaine, and opiates (e.g., opium and heroin). Amphetamine-type stimulants were not included given inconsistent data collection (e.g., reclassification) and fluctuating surveillance data quality. A secondary outcome of interest was defined as patterns of illegal drug seizures in a) major illegal drug source regions and, b) major destination markets, as identified by the United Nations Office on Drugs and Crime (UNODC).<sup>17</sup> These secondary outcome data were used as an additional proxy measure to assess the availability of illegal drugs in specific regions, as has been done previously.<sup>18</sup>  
<sup>19</sup> All outcomes were systematically identified through publicly available illegal drug surveillance systems. Linear by linear association trend tests were carried out on annualized estimates of all outcomes of interest. All price estimates are expressed in 2011 USD and are, where possible, adjusted for purity.<sup>20</sup>

### ***Illegal drug surveillance systems***

A search of illegal drug surveillance systems using two *a priori* defined inclusion criteria was carried out. First, because we specifically sought to assess the long-term impact of enforcement-based supply reduction strategies on illegal drug price and purity/potency, only surveillance systems that included continuous longitudinal assessments of these outcomes of interest for at least 10 years were prioritized for inclusion. Second, data extraction was restricted to 1990 and onwards to focus on patterns of supply during recent decades.

Data were obtained through systematic searches of registries of surveillance systems, governmental reports, and peer-reviewed publications, as

1 *Werb et al. Effectiveness of enforcement-based supply reduction...*

2 well as through data requests to relevant organizations including the UNODC. All  
3 authors had complete access to all data and all had final responsibility to submit  
4 for publication. Ethics approval was not required given that we relied exclusively  
5 on publicly available data.  
6  
7  
8  
9  
10

## 11 RESULTS

12 We identified 7 government surveillance systems that met inclusion  
13 criteria. Of these, 3 (43%) reported on international data, 3 (43%) reported on  
14 data from the United States (US), and 1 (14%) reported on data from Australia.  
15 The longest-running surveillance system identified, the US-based Marijuana  
16 Potency Monitoring Project, is funded by the U.S. National Institutes of Health  
17 and was established in 1975, while the most recent surveillance system was  
18 established in 2001 (e.g., the US-based *National Drug Threat Assessment*). With  
19 respect to international surveillance systems, the UNODC administers two  
20 separate surveillance systems that collect data from all participating United  
21 Nations member states: the Annual Reports Questionnaire surveillance system  
22 that collects price and purity/potency data, and the Drug Seizures Database that  
23 collects seizure data. Finally, the European Monitoring Centre for Drugs and  
24 Drug Addiction administers the Reitox drug surveillance system network, which  
25 aggregates data from a number of country-level surveillance systems in Europe,  
26 as described below.<sup>21</sup>  
27  
28  
29  
30  
31  
32  
33  
34  
35  
36  
37  
38  
39  
40  
41  
42  
43  
44  
45  
46  
47  
48

### 49 ***Price and Purity/Potency***

50 Table 1 presents surveillance systems that matched search criteria. An  
51 assessment of data provided by these surveillance systems demonstrated a  
52 number of broad trends. First, purity and/or potency of illegal drugs generally  
53  
54  
55  
56  
57  
58  
59  
60



1  
2  
3  
4  
5  
6  
7  
8  
9  
10  
11  
12  
13  
14  
15  
16  
17  
18  
19  
20  
21  
22  
23  
24  
25  
26  
27  
28  
29  
30  
31  
32  
33  
34  
35  
36  
37  
38  
39  
40  
41  
42  
43  
44  
45  
46  
47  
48  
49  
50  
51  
52  
53  
54  
55  
56  
57  
58  
59  
60

Werb et al. Effectiveness of enforcement-based supply reduction...

remained stable or increased overall during the study period. Second, the price of illegal drugs, with few exceptions, generally decreased. Third, seizures of cannabis, cocaine and opiates generally increased in major drug production regions and major domestic markets.

Figure 1 presents data from the US Drug Enforcement Administration's System To Retrieve Information from Drug Evidence (STRIDE). As can be seen, between 1990 and 2007 (the last year for which data are publicly available), the purity of heroin and cocaine, and the potency of cannabis in the US increased, while the inflation- and purity-adjusted prices of these three drugs declined.<sup>22</sup> Specifically, heroin purity increased by 60% ( $p = 0.568$ ), cocaine purity increased by 11% ( $p = 0.181$ ), and cannabis potency increased by 161% ( $p < 0.001$ ) during this time. During the same period, the prices of heroin, cocaine, and cannabis decreased 81% ( $p < 0.001$ ), 80% ( $p < 0.001$ ), and 86% ( $p < 0.001$ ) respectively.

Figure 2 presents data collected by the UNODC on the street price of cocaine and opiates in participating European countries (i.e., Austria, Belgium, Denmark, Finland, France, Germany, Greece, Italy, Luxembourg, Netherlands, Norway, Iceland, Portugal, Spain, Sweden, Switzerland, United Kingdom, and Ireland).<sup>23</sup> In these countries, between 1990 and 2009, the aggregate average retail street price of cocaine decreased by 51%, from \$198 USD per gram to \$98 USD per gram ( $p < 0.001$ ). Similarly, the aggregate average price of opiates in Europe decreased 74%, from a high of \$295 USD per gram in 1990 to \$77 USD per gram in 2009 ( $p < 0.001$ ).

Data from the Australian Illicit Drug Reporting System (IDRS) were available from 2000 to 2010. IDRS data suggest that the price of illegal drugs in

1 *Werb et al. Effectiveness of enforcement-based supply reduction...*

2 Australia fluctuated substantially during this period. Specifically, after adjustment,  
3 the price of heroin decreased by 49%, from approximately \$460 USD per gram to  
4 approximately \$235 per gram ( $p < 0.001$ ), the price of cocaine decreased 14%  
5 from approximately \$255 AUD per gram to \$220 AUD per gram ( $p = 0.477$ ), and  
6 the price of cannabis decreased 49% from approximately \$25 AUD per gram to  
7 \$13 AUD per gram ( $p < 0.001$ ).<sup>24</sup>

## 16 **Seizures**

### 17 *Domestic Markets*

18  
19  
20  
21 Figure 3 presents data on cannabis and cocaine seizures in the US  
22 between 1990 and 2010. As shown, data from the US Drug Enforcement  
23 Administration's STRIDE surveillance system demonstrate that the amount of  
24 cannabis herb seized by the Drug Enforcement Administration both in, and  
25 destined for, the US rose 465%, from approximately 130,000 kilograms in 1990  
26 to approximately 720,000 kilograms in 2010 ( $p < 0.001$ ). During this same period,  
27 despite fluctuations, the amount of cocaine seized by the US Drug Enforcement  
28 Administration decreased 49%, from approximately 57,000 kilograms in 1990 to  
29 29,000 in 2010 ( $p = 0.409$ ), while the amount of heroin seized increased 29%  
30 from approximately 535 kilograms in 1990 to 690 kilograms ( $p = 0.979$ , heroin  
31 seizure data not shown).<sup>25</sup>

32  
33  
34  
35  
36  
37  
38  
39  
40  
41  
42  
43  
44  
45  
46  
47  
48 Figure 4 presents data on cannabis, cocaine and heroin seizures in  
49 countries participating in the European Monitoring Centre for Drugs and Drug  
50 Addiction's Reitox surveillance network (i.e., European Union member countries,  
51 as well as Croatia, Norway, and Turkey), between 1995 and 2009. As can be  
52 seen, annual estimates of the quantity of both cocaine and cannabis seized  
53  
54  
55  
56  
57  
58  
59  
60

1 *Werb et al. Effectiveness of enforcement-based supply reduction...*

2 fluctuated throughout this period; however, the quantity of heroin seized  
3 increased relatively steadily. Specifically, the number of kilograms of cannabis  
4 herb seized was at a low of approximately 57,000 kilograms in 1995, and peaked  
5 one year later in 1996 at approximately 138,000 kilograms ( $p = 0.446$ ). The  
6 number of cocaine seizures was at a low of approximately 21,000 kilograms in  
7 1995, and peaked at approximately 121,000 kilograms in 2006 ( $p = 0.018$ ).  
8 Finally, the number of kilograms of heroin seized increased 380% from a low of  
9 approximately 5,000 in 1995 to a high of approximately 24,000 in 2009 ( $p <$   
10  $0.001$ ).  
11  
12  
13  
14  
15  
16  
17  
18  
19  
20  
21  
22  
23

### 24 *Production Regions*

25  
26 With respect to opiate seizures, the Golden Triangle includes parts of  
27 Thailand, Lao, Viet Nam and Myanmar, and according to the UNODC, this region  
28 is the second largest supplier of heroin globally.<sup>26</sup> Here, seizures of opium more  
29 than doubled from 3,198 kilograms in 1990 to 8,903 kilograms in 2006 ( $p =$   
30  $0.430$ ), the last year for which this data is available. By contrast, seizures of  
31 heroin decreased by more than half, from 1,337 kilograms in 1990, to 569  
32 kilograms in 2006 ( $p = 0.339$ ). In Afghanistan, which is believed to supply over  
33 90% of the world's opium,<sup>26</sup> seizures of opium increased by close to 9,000%,  
34 from 453 kilograms in 1990 to 40,959 kilograms in 2006, and seizures of heroin  
35 increased by approximately 220%, from 1,256 kilograms in 1990 to 4,053  
36 kilograms in 2006 (Note: missing data prevented a trend test for annual opium  
37 and heroin seizures in Afghanistan).  
38  
39  
40  
41  
42  
43  
44  
45  
46  
47  
48  
49  
50  
51  
52  
53

54 With respect to cocaine seizures, according to the UNODC, Latin  
55 America's Andean region, which includes Peru, Bolivia, and Colombia, is the  
56  
57  
58  
59  
60

*Werb et al. Effectiveness of enforcement-based supply reduction...*

1  
2  
3 primary global supplier of this drug, as coca leaf is grown exclusively in this  
4  
5 region.<sup>27</sup> While seizures of cocaine in the Andean region decreased 81%, from  
6  
7 97,437 kilograms in 1990 to 17,835 kilograms in 2007 ( $p = 0.028$ ), seizures of  
8  
9 coca leaf increased 188% from 601,038 kilograms in 1990 to 1.73 million  
10  
11 kilograms ( $p = 0.004$ ).  
12  
13

14 Finally, according to the UNODC, cannabis is produced in all global  
15  
16 regions, though major areas of cannabis cultivation exist in North Africa,  
17  
18 Afghanistan, and North America. These areas are net exporters of cannabis,  
19  
20 though most cannabis-producing countries also produce the drug for internal  
21  
22 consumption.<sup>17</sup> In North Africa (i.e., Algeria, Morocco, and Tunisia), seizures of  
23  
24 cannabis herb increased by 208% from 67,930 kilograms in 1990 to 209,445  
25  
26 kilograms in 2007 ( $p = 0.015$ ). In North America (i.e., Canada, the United States,  
27  
28 and Mexico), seizures of cannabis herb increased by 288% from 782,607  
29  
30 kilograms in 1990 to 3.05 million kilograms in 2007 ( $p < 0.001$ ). In Afghanistan,  
31  
32 while data on cannabis herb seizures are not available, seizures of cannabis  
33  
34 resin increased 630% from 5,068 kilograms in 1990 to 36,972 kilograms in 2006  
35  
36 ( $p = 0.061$ ).  
37  
38  
39  
40  
41

## 42 CONCLUSIONS

43  
44  
45 Longitudinal data from government surveillance systems demonstrate that  
46  
47 over the past two decades there has been a general pattern of increased illegal  
48  
49 drug supply as defined through lower price and higher purity of heroin, cocaine  
50  
51 and cannabis. During the same period, patterns of drug seizures either increased  
52  
53 or remained stable, though the trends detected in some of these indicators did  
54  
55 not reach statistical significance.  
56  
57  
58  
59  
60

1  
2  
3  
4  
5  
6  
7  
8  
9  
10  
11  
12  
13  
14  
15  
16  
17  
18  
19  
20  
21  
22  
23  
24  
25  
26  
27  
28  
29  
30  
31  
32  
33  
34  
35  
36  
37  
38  
39  
40  
41  
42  
43  
44  
45  
46  
47  
48  
49  
50  
51  
52  
53  
54  
55  
56  
57  
58  
59  
60

*Werb et al. Effectiveness of enforcement-based supply reduction...*

As noted elsewhere,<sup>28, 29</sup> there are limitations of ecologic analyses based on international surveillance systems. First, some states collect little or no data on indicators of illegal drug supply, whereas other states spend significant energy on monitoring drug availability. Second, even in states that closely track indicators of supply, the degree to which seized samples of illegal drugs reflect purity of retail drugs sold on the street is subject to variation, though where possible we presented purity-adjusted prices to address this limitation.<sup>20</sup> Nevertheless, the long-term trends in increasing purity and decreasing price presented here likely reflect overall trends in many regions, though some exceptions were observed. Australia for instance, while experiencing a significant decrease in the prices of both heroin and cannabis, did not experience a significant decrease in the price of cocaine, which may reflect the geographic isolation of the region or other market factors. Third, limitations in longitudinal data collection precluded our ability to include amphetamine-type stimulants and other emerging synthetic substances. It is noteworthy in this regard that the production of synthetic substances present particular challenges for supply reduction strategies, given that these drugs can be mass produced in clandestine locations regardless of climate or other factors that limit traditional drug production.<sup>17, 30</sup> Finally, while this review focused on the impact of enforcement-based supply reductions on price and purity of selected illegal drugs, these measures are only a marker of drug supply, and do not measure other factors determining availability and concomitant rates of drug use. It is noteworthy in this regard that a recent World Health Organization report that assessed data from a combined sample of over 85,000 participants in 17 countries found no

*Werb et al. Effectiveness of enforcement-based supply reduction...*

1  
2  
3 association between the intensity of national drug law enforcement and rates of  
4  
5 drug use.<sup>31</sup>  
6

7  
8 In summary, longitudinal illegal drug surveillance systems demonstrate a  
9  
10 general global pattern of falling drug prices and increasing drug purity and  
11  
12 potency, alongside a relatively consistent pattern of increasing seizures of illegal  
13  
14 drugs. Although source data have limitations and there are some exceptions to  
15  
16 these trends, these findings highlight the need to re-examine the effectiveness of  
17  
18 national and international drug strategies that place a disproportionate emphasis  
19  
20 on supply reduction at the expense of prevention and treatment of illegal drug  
21  
22 use.  
23  
24  
25  
26  
27  
28  
29  
30  
31  
32  
33  
34  
35  
36  
37  
38  
39  
40  
41  
42  
43  
44  
45  
46  
47  
48  
49  
50  
51  
52  
53  
54  
55  
56  
57  
58  
59  
60

1  
2  
3  
4  
5  
6  
7  
8  
9  
10  
11  
12  
13  
14  
15  
16  
17  
18  
19  
20  
21  
22  
23  
24  
25  
26  
27  
28  
29  
30  
31  
32  
33  
34  
35  
36  
37  
38  
39  
40  
41  
42  
43  
44  
45  
46  
47  
48  
49  
50  
51  
52  
53  
54  
55  
56  
57  
58  
59  
60

*Werb et al. Effectiveness of enforcement-based supply reduction...*

### **Acknowledgments:**

The authors would like to thank Deborah Graham, Peter Vann, Katherine Quayle, Samantha MacLean, and Kevin Lutz for their administrative assistance. Dan Werb is supported by the Canadian Institutes of Health Research. Thomas Kerr is supported by the Canadian Institutes of Health Research and the Michael Smith Foundation for Health Research.

### **Competing interests:**

All authors declare that (1) DW, TK, BN, JM and EW have support from the BC Centre for Excellence in HIV/AIDS for their submitted work; SS has support from the Division of Global Public Health, Department of Medicine, University of California, San Diego; (2) DW, TK, BN, SS, and EW have no relationships with companies that might have an interest in the submitted work in the previous 3 years; (3) their spouses, partners, or children have no financial relationships that may be relevant to the submitted work; and (4) DW, TK, BN, SS and EW have no non-financial interests that may be relevant to the submitted work. JM has received grants from, served as an ad hoc adviser to, or spoken at events sponsored by Abbott, Argos Therapeutics, Bioject Inc., Boehringer Ingelheim, BMS, Gilead Sciences, GlaxoSmithKline, Hoffmann-La Roche, Janssen-Ortho, Merck Frosst, Panacos, Pfizer Ltd., Schering, Serono Inc., TheraTechnologies, Tibotec (J&J), and Trimeris.

### **Contributorship**

1 *Werb et al. Effectiveness of enforcement-based supply reduction...*

2 All authors contributed substantially to the design and drafting of the manuscript.

3  
4  
5 DW and EW designed the initial methodological approach and drafted the  
6  
7 manuscript; TK, BN, SS, and JM provided substantial revisions to the manuscript.  
8

9  
10 **Data sharing**

11 This study employed publicly available data, as described in the methods section.  
12  
13

14  
15 **Funding**

16  
17 None  
18  
19  
20  
21  
22  
23  
24  
25  
26  
27  
28  
29  
30  
31  
32  
33  
34  
35  
36  
37  
38  
39  
40  
41  
42  
43  
44  
45  
46  
47  
48  
49  
50  
51  
52  
53  
54  
55  
56  
57  
58  
59  
60



1  
2  
3  
4  
5  
6  
7  
8  
9  
10  
11  
12  
13  
14  
15  
16  
17  
18  
19  
20  
21  
22  
23  
24  
25  
26  
27  
28  
29  
30  
31  
32  
33  
34  
35  
36  
37  
38  
39  
40  
41  
42  
43  
44  
45  
46  
47  
48  
49  
50  
51  
52  
53  
54  
55  
56  
57  
58  
59  
60

Werb et al. Effectiveness of enforcement-based supply reduction...

## References:

1. Pietschmann T, Walker J. Estimating illicit financial flows resulting from drug trafficking and other transnational organized crimes. Vienna: UNODC Studies and Threat Analysis Section, Division for Policy Analysis and Public Affairs; 2011.
2. Jurgens R, Ball A, Verster A. Interventions to reduce HIV transmission related to injecting drug use in prison. *Lancet Infect Dis.* 2009; **9**(1): 57-66.
3. Beyrer C, Malinowska-Sempruch K, Kamarulzaman A, Kazatchkine M, Sidibe M, Strathdee SA. Time to act: A call for comprehensive responses to HIV in people who use drugs. *Lancet.* 2010; **376**(9740): 551-63.
4. Coffin PO, Galea S, Ahern J, Leon AC, Vlahov D, Tardiff K. Opiates, cocaine, and alcohol combinations in accidental drug overdose deaths in New York City, 1990-98. *Addiction.* 2003; **98**(6): 739.
5. Garfield J, Drucker E. Fatal overdose trends in major US cities: 1990 - 1997. *Addict Res Theory.* 2001; **9**(5): 425.
6. Mathers BM, Degenhardt L, Phillips B, Wiessing L, Hickman M, Strathdee SA, et al. Global epidemiology of injecting drug use and HIV among people who inject drugs: A systematic review. *Lancet.* 2008; **372**(9651): 1733-45.
7. Shepard CW, Finelli L, Alter MJ. Global epidemiology of hepatitis C virus infection. *Lancet Infect Dis.* 2005; **5**(9): 558-67.
8. Werb D, Rowell G, Guyatt G, Kerr T, Montaner J, Wood E. Effect of drug law enforcement on drug market violence: A systematic review. *Int J Drug Pol.* 2011; **22**(2): 8.
9. ECOSOC. Convention on Psychotropic Substances, 1971. Vienna: international; 1971.
10. ECOSOC. The Single Convention on Narcotic Drugs, 1961. As amended by the 1972 Protocol amending the Single Convention on Narcotic Drugs, 1961. Vienna: international; 1972.
11. ECOSOC. United Nations Convention Against Illicit Traffic in Narcotic Drugs and Psychotropic Substances, 1988. Vienna: United Nations Economic and Social Council; 1988.

Werb et al. Effectiveness of enforcement-based supply reduction...

12. Travis A. Home Office rejects decriminalising possession of drugs for personal use. *The Guardian*. 2011 October 14.
13. Hoeffel J. Federal crackdown on medical pot sales reflects a shift in policy. *Los Angeles Times*. 2011 October 7.
14. Warren J, Gelb A, Horowitz J, Riordan J. One in 100: Behind bars in America 2008. Washington, D.C.: The Pew Center on the States 2008.
15. Farrell G, Clark, K. What does the world spend on criminal justice? Helsinki: The European Institute for Criminal Prevention and Control, affiliated with the United Nations; 2004.
16. Walmsley R. World prison population list. Report. London: International Centre for Prison Studies; 2007.
17. UNODC. World Drug Report 2011. Vienna: United Nations Office on Drugs and Crime; 2011.
18. Roberts M, Bewley-Taylor DR, Trace M. Monitoring drug policy outcomes: the measurement of drug-related harm: Beckley Foundation Drug Policy Programme; 2006.
19. Lenke L. An analysis of the significance of supply and market factors for variations in European cannabis use. *EMCDDA Monographs*. 2008: 293.
20. Caulkins JP. Price and purity analysis for illicit drug: Data and conceptual issues. *Drug Alc Depend*. 2007; **90**: S61-S8.
21. Hartnoll R. Drug epidemiology in the European institutions: Historical background and key indicators. *Bulletin on Narcotics*. 2003; **55**(1): 53-72.
22. Fries A, Anthony RW, Cseko Jr. A, Gaither CC, Schulman E. The price and purity of illicit drugs: 1981 - 2007. Alexandria, VA: Institute for Defense Analyses; 2008.
23. UNODC. World Drug Report 2010: Statistical Annex. Vienna: United Nations Office on Drugs and Crime; 2010.
24. Stafford J, Burns L. Australian drug trends 2010: Findings from the Illicit Drug Reporting System (IDRS). Sydney: National Drug and Alcohol Research Centre; 2011.
25. DEA. STRIDE surveillance system. New York: United States Drug Enforcement Administration; 2011.

Werb et al. Effectiveness of enforcement-based supply reduction...

26. UNODC. World Drug Report 2010. Vienna: United Nations Office on Drugs and Crime; 2010.
27. ONDCP. Coca in the Andes. Washington, D.C.: Office of National Drug Control Policy; 2011.
28. Caulkins JP. Comment: Should the DEA's STRIDE data be used for economic analyses of markets for illegal drugs? J Am Statistical Assoc. 2001; **96**(456): 1263-4.
29. Manski CF, Pepper J, Petrie C. Informing America's policy on illegal drugs: What we don't know keeps hurting us: National Academies Press; 2001.
30. EMCDDA. Europol 2010 annual report on the implementation of council decision 2005/387/JHA. Lisbon: European Monitoring Centre for Drugs and Drug Addiction; 2010.
31. Degenhardt L, Chiu W-T, Sampson N, Kessler RC, Anthony JC, Angermeyer M, et al. Toward a global view of alcohol, tobacco, cannabis, and cocaine use: Findings from the WHO World Mental Health Surveys. PLOS Medicine. 2008; **5**(7): 1053-67.

Werb et al. Effectiveness of enforcement-based supply reduction...

**Table 1: Major Illegal Drug Data Surveillance Systems**

| Surveillance system                         | Country/Region | Inception Date | Illegal drugs considered |         |        | Outcomes considered |        |     |          | Summary of findings                                                                                                                |
|---------------------------------------------|----------------|----------------|--------------------------|---------|--------|---------------------|--------|-----|----------|------------------------------------------------------------------------------------------------------------------------------------|
|                                             |                |                | cannabis                 | cocaine | heroin | Price               | Purity | Use | Seizures |                                                                                                                                    |
| University of Mississippi Marijuana Project | USA            | 1975 -         | X                        |         |        |                     | X      |     |          | Cannabis potency increased between 1990 and 2009.                                                                                  |
| STRIDE Surveillance System                  | USA            | 1986-          | X                        | X       | X      | X                   | X      |     |          | Price decreased and purity/potency increased across all illegal drugs considered.                                                  |
| UNODC Drug Seizures Database                | International  | 1980 -         | X                        | X       | X      |                     |        |     | X        | Seizures of all drugs have increased between 1995 and 2006.                                                                        |
| UNODC Annual Reports Questionnaire          | International  | 1990 -         | X                        | X       | X      | X                   | X      | X   |          | Prices of opiates, cocaine, and cannabis have generally decreased in Europe and the US while purity and potency have increased.    |
| Reitox (EMCDDA database)                    | Europe         | 1993 -         | X                        | X       | X      | X                   |        |     | X        | Price of all illegal substances decreased in 2002 to 2007. Cocaine, cannabis, and heroin seizures increased between 2002 and 2007. |
| Illicit Drug Reporting System               | Australia      | 2000 -         | X                        | X       | X      | X                   | X      |     | X        | Between 2000 and 2010, the price of cocaine, cannabis and heroin decreased, while perceived purity remained stable.                |
| National Drug Threat Assessment             | USA            | 2001 -         | X                        | X       | X      | X                   |        |     | X        | Between 2005 and 2009, cocaine purity decreased whereas price increased.                                                           |

Note: STRIDE: System To Retrieve Information from Drug Evidence, EU = European Union, EC = European Commission; EMCDDA = European Monitoring Centre For Drugs and Drug Addiction; UNODC = United Nations Office of Drug Control

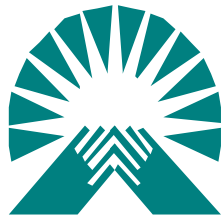

**British Columbia  
Centre for Excellence  
in HIV/AIDS**

Providence Health Care, St. Paul's Hospital, The University of  
British Columbia and The Ministry of Health, British Columbia, Canada

April 17, 2013

Dr. Trish Groves  
*BMJ Open Editorial Office*  
BMA House  
Tavistock Square  
London, WC1H 9JR  
UK

Dear Dr. Groves and Colleagues:

As you are surely aware, there has been an increasing focus by scientists and policymakers on evaluating the effectiveness of law enforcement-based interventions for controlling illicit drugs. However, despite a wealth of governmental surveillance data on indicators of drug supply (e.g., the price and purity of illicit drugs), few published studies subject these data to longitudinal analyses. As such, the enclosed manuscript presents analyses of international trends in the supply of major illicit drugs over the past two decades, as measured through governmental surveillance data on the price and purity of illicit drugs, as well as on levels of illicit drug seizures in major drug production zones and destination markets.

Given the current international debate regarding the effectiveness of current drug policy approaches, we believe that the publication of the enclosed manuscript will be of high interest to your readership. As is customary, this letter will certify that the enclosed article is not being considered for publication elsewhere. This letter also certifies if the enclosed manuscript is acceptable, we will turn copyright over to *BMJ Open*.

Thank you for your consideration.

Yours sincerely,

Evan Wood, MD, PhD ABIM FRCPC  
Professor of Medicine, University of British Columbia  
Director, Urban Health Research Initiative  
BC Centre for Excellence in HIV/AIDS  
CANADA

1  
2  
3  
4  
5  
6  
7  
8  
9  
10  
11  
12  
13  
14  
15  
16  
17  
18  
19  
20  
21  
22  
23  
24  
25  
26  
27  
28  
29  
30  
31  
32  
33  
34  
35  
36  
37  
38  
39  
40  
41  
42  
43  
44  
45  
46  
47  
48  
49  
50  
51  
52  
53  
54  
55  
56  
57  
58  
59  
60

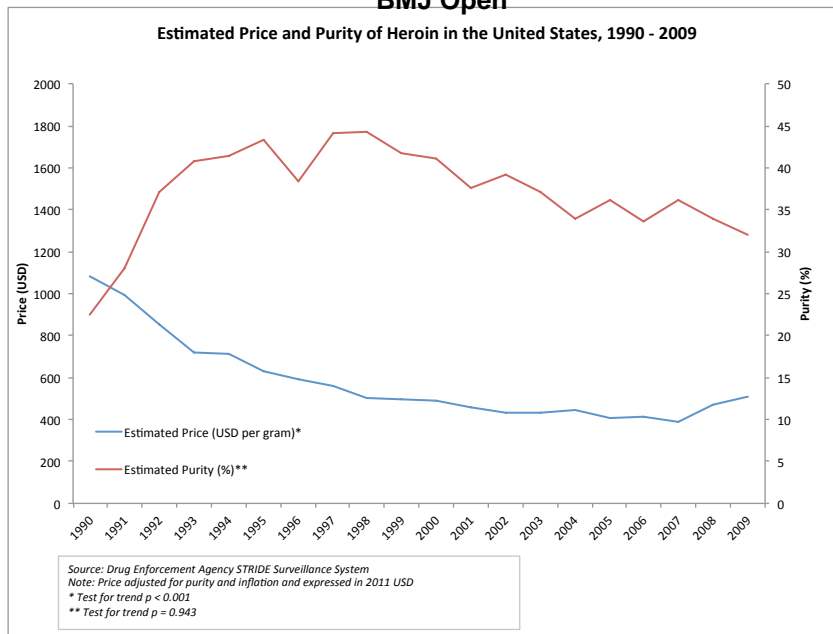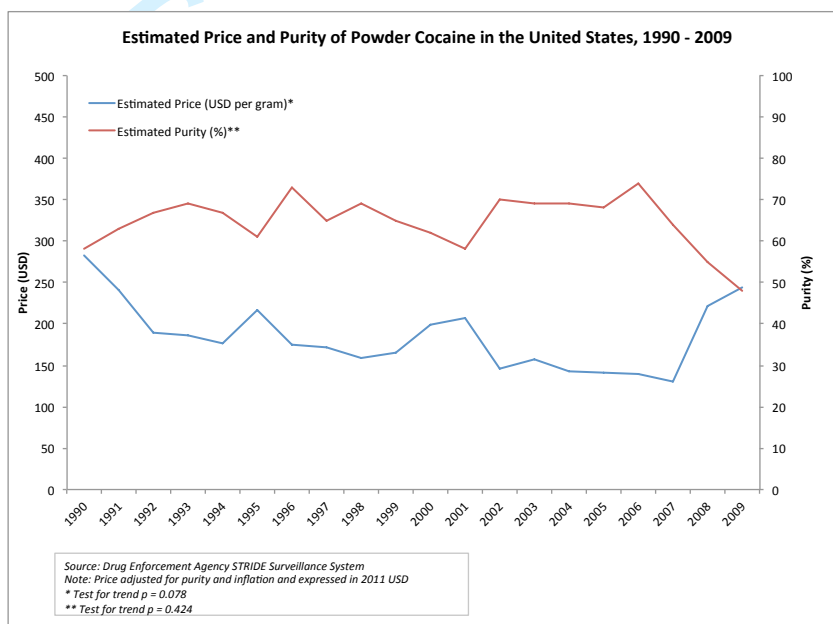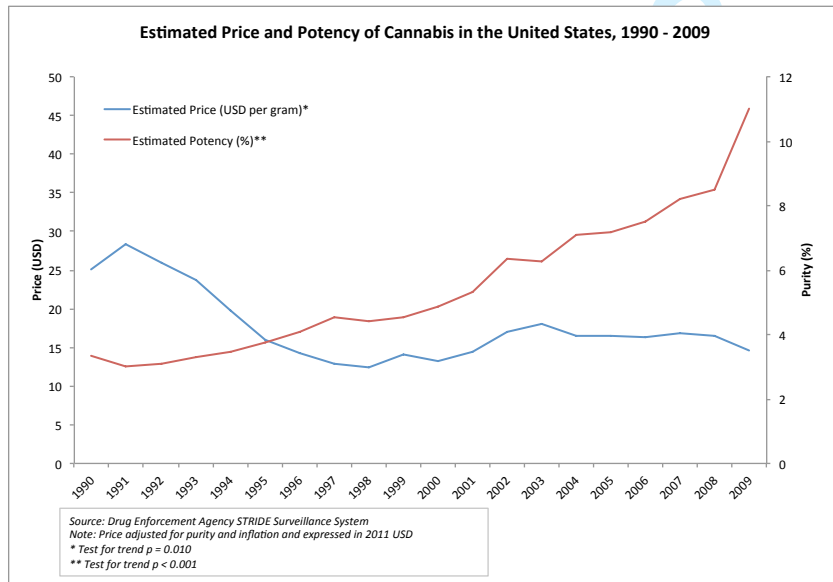

Figure 1. Estimated Price and Purity of Heroin, Cocaine and Cannabis in the United States, 1990 – 2009

For peer review only: <http://bmjopen.bmj.com/site/about/guidelines.xhtml>

Figure 2. Average Inflation-Adjusted Price of Opiates and Cocaine in Europe, 1990 - 2007

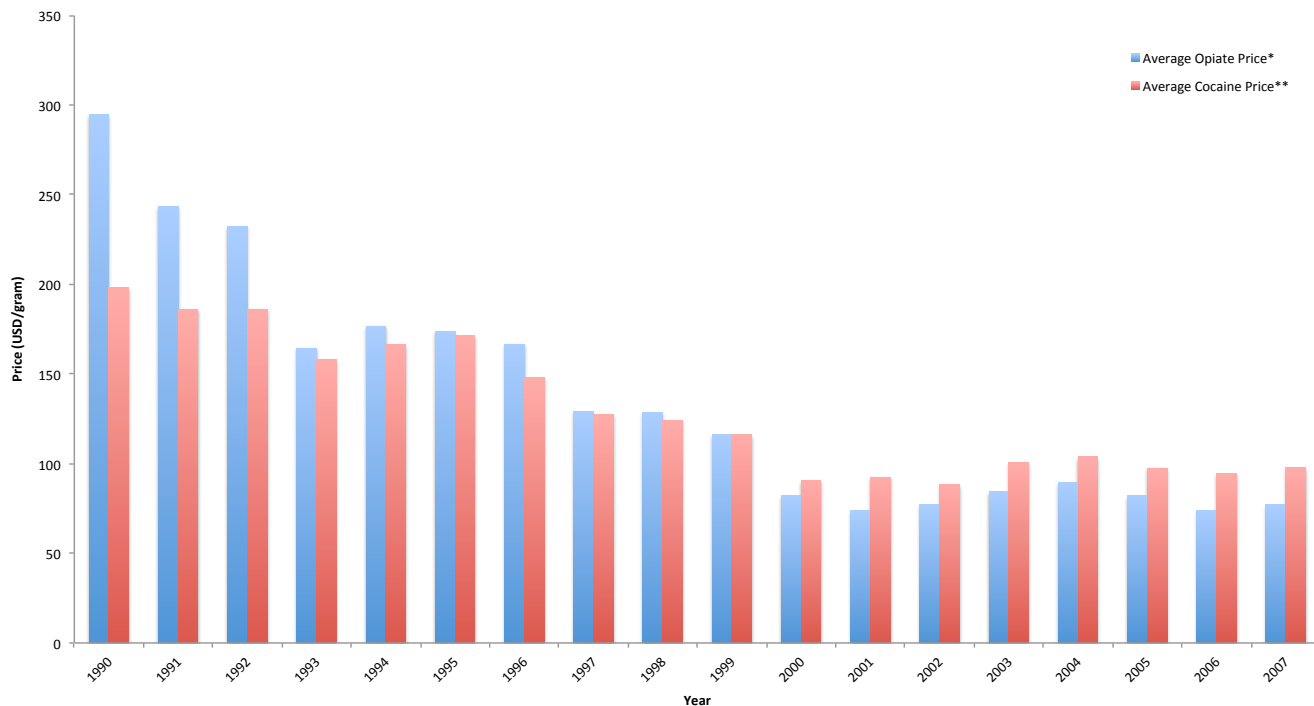

Source: United Nations Office on Drugs and Crime Annual Reports Questionnaire  
 Note: Price adjusted for CPI inflation  
 \* Test for trend:  $p < 0.001$   
 \*\* Test for trend:  $p < 0.001$

view only

1  
2  
3  
4  
5  
6  
7  
8  
9  
10  
11  
12  
13  
14  
15  
16  
17  
18  
19  
20  
21  
22  
23  
24  
25  
26  
27  
28  
29  
30  
31  
32  
33  
34  
35  
36  
37  
38  
39  
40  
41  
42  
43  
44  
45  
46  
47  
48  
49  
50  
51  
52  
53  
54  
55  
56  
57  
58  
59  
60

1  
2  
3  
4  
5  
6  
7  
8  
9  
10  
11  
12  
13  
14  
15  
16  
17  
18  
19  
20  
21  
22  
23  
24  
25  
26  
27  
28  
29  
30  
31  
32  
33  
34  
35  
36  
37  
38  
39  
40  
41  
42  
43  
44  
45  
46  
47  
48  
49  
50  
51  
52  
53  
54  
55  
56  
57  
58  
59  
60

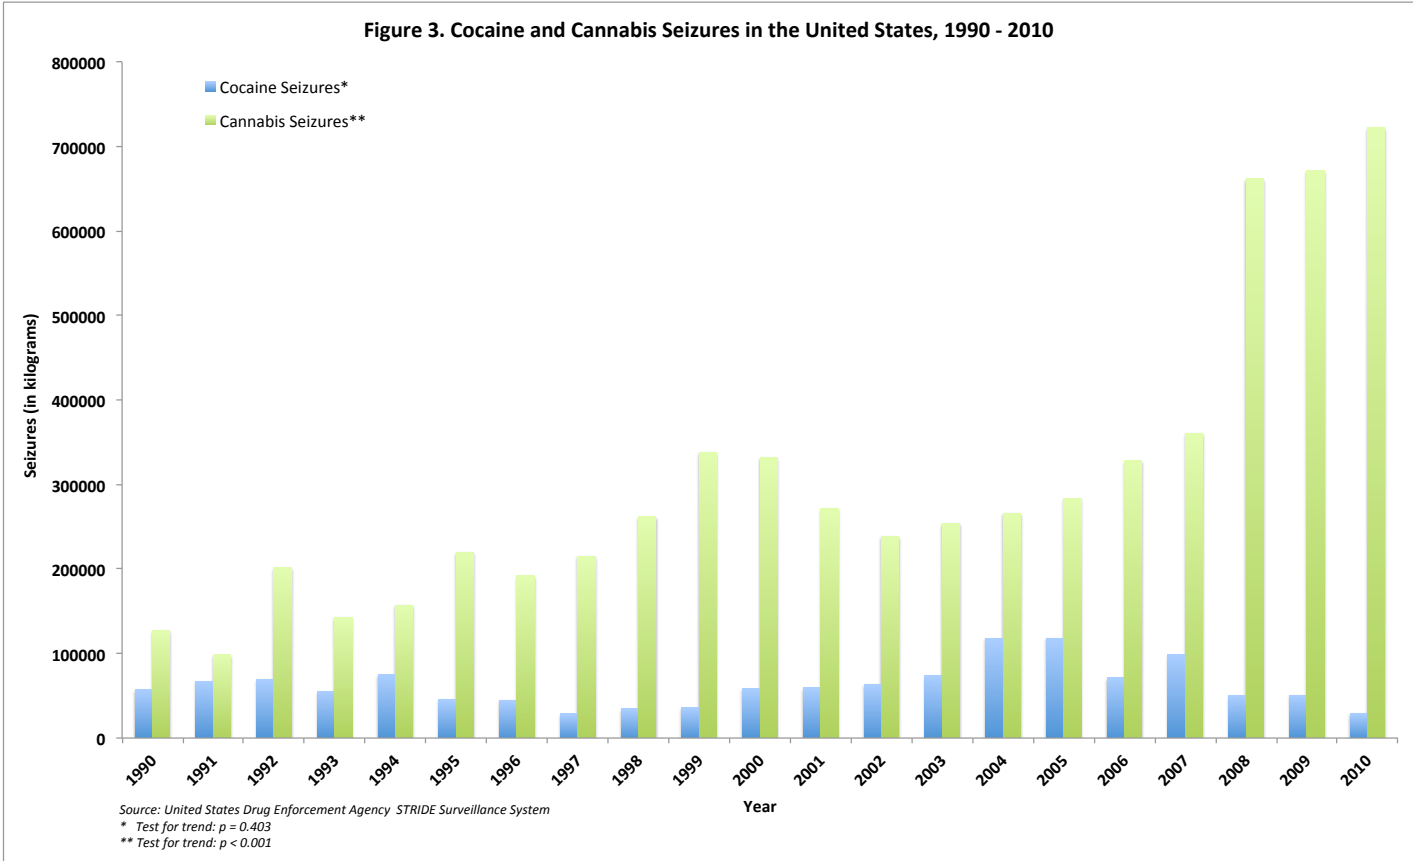

Review only



Figure 4. Cocaine, Cannabis and Heroin Seizures in Europe\*, 1990 - 2010

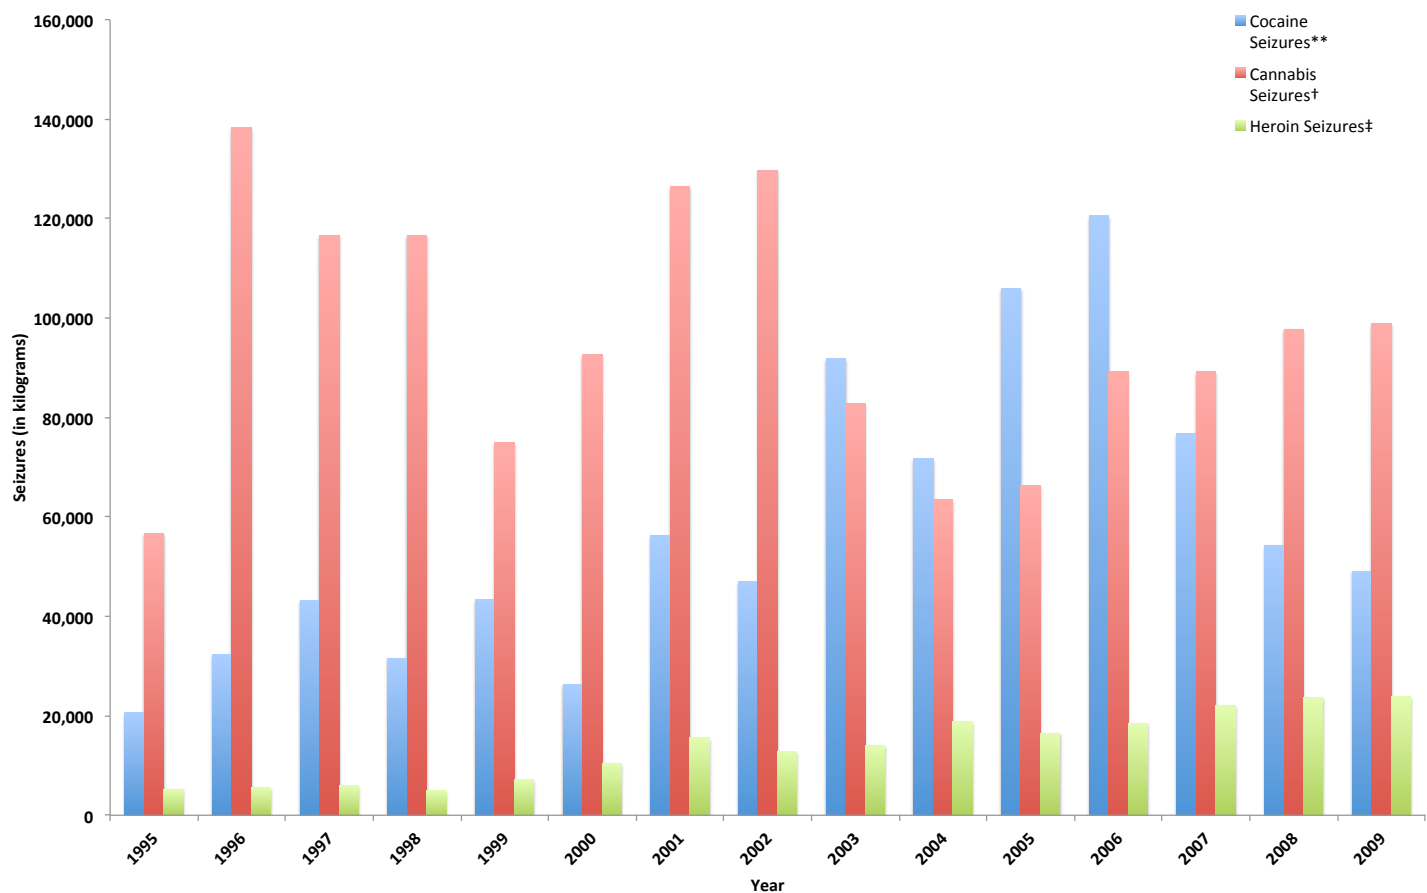

Source: European Monitoring Centre for Drugs and Drug Addiction REITOX Network  
 \* Refers to European Union member countries, Croatia, Norway, and Turkey  
 \*\* Test for trend:  $p = 0.018$   
 † Test for trend:  $p = 0.446$   
 ‡ Test for trend:  $p < 0.001$

only



**The temporal relationship between drug supply indicators:  
An audit of international government surveillance systems**

|                                 |                                                                                                                                                                                                                                                                                                                                                                                                                        |
|---------------------------------|------------------------------------------------------------------------------------------------------------------------------------------------------------------------------------------------------------------------------------------------------------------------------------------------------------------------------------------------------------------------------------------------------------------------|
| Journal:                        | <i>BMJ Open</i>                                                                                                                                                                                                                                                                                                                                                                                                        |
| Manuscript ID:                  | bmjopen-2013-003077.R1                                                                                                                                                                                                                                                                                                                                                                                                 |
| Article Type:                   | Research                                                                                                                                                                                                                                                                                                                                                                                                               |
| Date Submitted by the Author:   | 07-Jun-2013                                                                                                                                                                                                                                                                                                                                                                                                            |
| Complete List of Authors:       | Werb, Dan; BC Centre for Excellence in HIV/AIDS, Urban Health Research Initiative<br>Kerr, Thomas; BC Centre for Excellence in HIV/AIDS, Urban Health Research Initiative<br>Nosyk, Bohdan; BC Centre for Excellence in HIV/AIDS,<br>Strathdee, Steffanie; University of California San Diego, Medicine<br>Montaner, Julio; BC Centre for Excellence in HIV/AIDS,<br>Wood, Evan; BC Centre for Excellence in HIV/AIDS, |
| <b>Primary Subject Heading</b>: | Public health                                                                                                                                                                                                                                                                                                                                                                                                          |
| Secondary Subject Heading:      | Health policy, Public health                                                                                                                                                                                                                                                                                                                                                                                           |
| Keywords:                       | AUDIT, Public health < INFECTIOUS DISEASES, PUBLIC HEALTH                                                                                                                                                                                                                                                                                                                                                              |
|                                 |                                                                                                                                                                                                                                                                                                                                                                                                                        |

SCHOLARONE™  
Manuscripts

Werb et al. Effectiveness of enforcement-based supply reduction...

# The temporal relationship between drug supply indicators: An audit of international government surveillance systems

Dan Werb; Thomas Kerr; Bohdan Nosyk; Steffanie Strathdee; Julio Montaner; Evan Wood

**Dan Werb**, Senior Research Assistant, Urban Health Research Initiative, BC Centre for Excellence in HIV/AIDS, Vancouver, Canada, 608 – 1081 Burrard Street, Vancouver, B.C., Canada, V6Z 1Y6

**Thomas Kerr**, Director, Urban Health Research Initiative, BC Centre for Excellence in HIV/AIDS, Vancouver, Canada, 608 – 1081 Burrard Street, Vancouver, B.C., Canada, V6Z 1Y6

**Bohdan Nosyk**, Research Scientist, BC Centre for Excellence in HIV/AIDS, Vancouver, Canada, 608 – 1081 Burrard Street, Vancouver, B.C., Canada, V6Z 1Y6

**Steffanie Strathdee**, Associate Dean of Global Health Sciences, University of California San Diego, Institute of the Americas, 10111 N. Torrey Rd., La Jolla, CA, USA, 92093-0507

**Julio Montaner**, Director, BC Centre for Excellence in HIV/AIDS, Vancouver, Canada, 608 – 1081 Burrard Street, Vancouver, B.C., Canada, V6Z 1Y6

**Evan Wood**, Director, Urban Health Research Initiative, BC Centre for Excellence in HIV/AIDS, Vancouver, Canada, 608 – 1081 Burrard Street, Vancouver, B.C., Canada, V6Z 1Y6

**Send correspondence to:** Evan Wood, MD, PhD ABIM FRCPC  
Professor of Medicine, University of British Columbia  
BC Centre for Excellence in HIV/AIDS  
608-1081 Burrard Street, Vancouver, B.C. V6Z 1Y6  
CANADA  
Tel: (604) 806-9116  
Fax: (604) 806-9044  
Email: uhri-ew@cfenet.ubc.ca

**Word Count:** 2,575

**Tables:** 1

**Figures:** 4

Werb et al. Effectiveness of enforcement-based supply reduction...

**Revised:** June 7, 2013

**Printed:** June 7, 2013

For peer review only

1  
2  
3  
4  
5  
6  
7  
8  
9  
10  
11  
12  
13  
14  
15  
16  
17  
18  
19  
20  
21  
22  
23  
24  
25  
26  
27  
28  
29  
30  
31  
32  
33  
34  
35  
36  
37  
38  
39  
40  
41  
42  
43  
44  
45  
46  
47  
48  
49  
50  
51  
52  
53  
54  
55  
56  
57  
58  
59  
60

**ABSTRACT**

**Objectives:** Illegal drug use continues to be a major threat to community health and safety. We used international drug surveillance databases to assess the **relationship between multiple** long-term estimates of illegal drug price and purity.

**Design:** We systematically searched for longitudinal measures of illegal drug supply indicators to assess the long-term impact of enforcement-based supply reduction interventions.

**Setting:** Data from identified illegal drug surveillance systems were analysed using an *a priori* defined protocol in which we sought to present annual estimates beginning in 1990. Data were then subjected to trend analyses.

**Main Outcome Measures:** Data were obtained from government surveillance systems assessing price, purity, and/or seizure quantities of illegal drugs; systems with at least 10 years of longitudinal data assessing price, purity/potency, or seizures were included.

**Results:** We identified 7 regional/international meta-surveillance systems with longitudinal measures of price or purity/potency that met eligibility criteria. In the United States, the average inflation- and purity-adjusted prices of heroin, cocaine, and cannabis decreased by 81%, 80% and 86% respectively between 1990 and 2007, whereas average purity increased by 60%, 11%, and 161% respectively. Similar trends were observed in Europe, where during the same period the average inflation-adjusted price of opiates and cocaine decreased by 74% and 51% respectively. In Australia, the average inflation-adjusted price of cocaine decreased 14%, while the inflation-adjusted price of heroin and cannabis both decreased 49% between 2000 and 2010. During this time, seizures of these drugs in major production regions and major domestic markets generally increased.

**Conclusions:** With few exceptions and despite increasing investments in enforcement-based supply reduction efforts aimed at disrupting global drug supply, illegal drug prices have generally decreased while drug purity has generally increased since 1990. These findings suggest that expanding efforts at controlling the global illegal drug market through law enforcement are failing.

Word count: 300

1  
2  
3  
4  
5  
6  
7  
8  
9  
10  
11  
12  
13  
14  
15  
16  
17  
18  
19  
20  
21  
22  
23  
24  
25  
26  
27  
28  
29  
30  
31  
32  
33  
34  
35  
36  
37  
38  
39  
40  
41  
42  
43  
44  
45  
46  
47  
48  
49  
50  
51  
52  
53  
54  
55  
56  
57  
58  
59  
60

Werb et al. Effectiveness of enforcement-based supply reduction...

## Article Summary

### Article focus

- Studies have demonstrated that illegal drug use remains a threat to community health and safety.
- However, less is known regarding the long-term impact of efforts to reduce the overall supply of illegal drugs.

### Key messages

- Using longitudinal governmental surveillance data, this study demonstrates that over the past two decades, the supply of major illegal drugs has increased, as measured through a general decline in the price, and a general increase in the purity of illegal drugs in a variety of settings.

### Strengths and limitations

- This study was limited by the quality and consistency of surveillance data on illegal drug supply
- This study presents data on trends in illegal drug supply in a variety of settings **over two decades**, including consumer and export drug markets

*Werb et al. Effectiveness of enforcement-based supply reduction...*

## OBJECTIVES

The United Nations (UN) recently estimated that the global illegal drug trade is worth at least \$350 billion USD annually,<sup>1</sup> and illegal drug use remains a major threat to community health and safety.<sup>2, 3</sup> In addition to the range of harms associated with the direct health effects of drugs, including fatal overdose,<sup>4, 5</sup> illegal drug use is also one of the key global drivers of blood borne disease transmission, in particular human immunodeficiency virus (HIV) infection.<sup>6, 7</sup> Illegal drug markets also contribute to community concerns such as high rates of violence in settings where the trade proliferates.<sup>8</sup>

In response to the health and social concerns associated with illegal drug use, several UN conventions were created to control the possession, consumption, and manufacture of illegal drugs.<sup>9-11</sup> As a result, over the last several decades, most national drug control strategies have prioritized drug law enforcement interventions to reduce drug supply, despite recent calls by experts to explore alternative models of drug control such as systems of drug decriminalization and legal regulation.<sup>12-14</sup> Some unintended consequences of this approach, such as record incarceration rates, have been well-documented.<sup>15-18</sup> Additionally, a small number of studies assessing aspects of drug supply, measured through indicators of drug price, purity/potency and seizures, have been undertaken to describe the global relationship between these indicators over the long-term.<sup>19</sup> However, systematic evaluation of these relationships is still needed to elucidate patterns of drug supply. The present study therefore sought to systematically identify international data from publicly available illegal drug surveillance systems to assess long-term estimates of illegal drug supply.

1  
2  
3  
4  
5  
6  
7  
8  
9  
10  
11  
12  
13  
14  
15  
16  
17  
18  
19  
20  
21  
22  
23  
24  
25  
26  
27  
28  
29  
30  
31  
32  
33  
34  
35  
36  
37  
38  
39  
40  
41  
42  
43  
44  
45  
46  
47  
48  
49  
50  
51  
52  
53  
54  
55  
56  
57  
58  
59  
60

Werb et al. Effectiveness of enforcement-based supply reduction...

## DESIGN

### **Outcomes of interest**

The primary outcomes of interest were long-term patterns of illegal drug supply, measured through indicators of price and purity/potency for three major illegal drugs: cannabis, cocaine, and opiates (e.g., opium and heroin). While data on amphetamine-type stimulants exist in some specific countries (e.g., the United Kingdom), this class of drugs was not included given inconsistent data collection and classification, and fluctuating surveillance periods and overall data quality. A secondary outcome of interest was data on illegal drug seizures in a) major illegal drug source regions and, b) major destination markets, as identified by the United Nations Office on Drugs and Crime (UNODC).<sup>20</sup> These secondary outcome data were used as an additional proxy measure to assess the availability of illegal drugs in specific regions, as has been done previously.<sup>21, 22</sup> All outcomes were systematically identified through publicly available illegal drug surveillance systems. Linear by linear association trend tests were carried out on annualized estimates of all outcomes of interest. All price estimates are expressed in 2011 USD and are, where possible, adjusted for purity.<sup>23</sup>

### **Illegal drug surveillance systems**

An online search of surveillance systems monitoring illegal drugs using two *a priori* defined inclusion criteria was carried out. First, because we specifically sought to assess the long-term impact of enforcement-based supply reduction strategies on illegal drug price and purity/potency, only surveillance systems that included continuous longitudinal assessments of these outcomes of interest for at least 10 years were prioritized for inclusion. Second, data



Werb et al. Effectiveness of enforcement-based supply reduction...

1  
2  
3  
4  
5  
6  
7  
8  
9  
10  
11  
12  
13  
14  
15  
16  
17  
18  
19  
20  
21  
22  
23  
24  
25  
26  
27  
28  
29  
30  
31  
32  
33  
34  
35  
36  
37  
38  
39  
40  
41  
42  
43  
44  
45  
46  
47  
48  
49  
50  
51  
52  
53  
54  
55  
56  
57  
58  
59  
60  
extraction was restricted to 1990 and onwards to focus on patterns of supply during recent decades.

Data were obtained through systematic searches of registries of surveillance systems (e.g., governmental websites, United Nations databases), governmental reports, and peer-reviewed publications, as well as through data requests to relevant organizations including the UNODC. All authors had complete access to all data and all had final responsibility to submit for publication. Ethics approval was not required given that we relied exclusively on publicly available data.

## RESULTS

We identified 7 government surveillance systems that met inclusion criteria. Of these, 3 (43%) reported on international data, 3 (43%) reported on data from the United States (US), and 1 (14%) reported on data from Australia. One of the longest-running surveillance system identified, the US-based Marijuana Potency Monitoring Project, is funded by the U.S. National Institutes of Health and was established in 1975, while the most recent surveillance system was established in 2001 (e.g., the US-based *National Drug Threat Assessment*). With respect to international surveillance systems, the UNODC administers two separate surveillance systems that collect data from all participating United Nations member states: the Annual Reports Questionnaire surveillance system that collects price and purity/potency data, and the Drug Seizures Database that collects seizure data. Finally, the European Monitoring Centre for Drugs and Drug Addiction administers the Reitox drug surveillance system network, which

1  
2  
3  
4  
5  
6  
7  
8  
9  
10  
11  
12  
13  
14  
15  
16  
17  
18  
19  
20  
21  
22  
23  
24  
25  
26  
27  
28  
29  
30  
31  
32  
33  
34  
35  
36  
37  
38  
39  
40  
41  
42  
43  
44  
45  
46  
47  
48  
49  
50  
51  
52  
53  
54  
55  
56  
57  
58  
59  
60

Werb et al. Effectiveness of enforcement-based supply reduction...

aggregates data from a number of country-level surveillance systems in Europe, as described below.<sup>24</sup>

### **Price and Purity/Potency**

Table 1 presents surveillance systems that matched search criteria. An assessment of data provided by these surveillance systems demonstrated a number of broad trends. First, purity and/or potency of illegal drugs generally remained stable or increased overall during the study period. Second, the price of illegal drugs, with few exceptions, generally decreased. Third, seizures of cannabis, cocaine and opiates generally increased in major drug production regions and major domestic markets.

Figure 1 presents data from the US Drug Enforcement Administration's System To Retrieve Information from Drug Evidence (STRIDE). As can be seen, between 1990 and 2007 (the last year for which data are publicly available), the purity of heroin and cocaine, and the potency of cannabis herb in the US increased, while the inflation- and purity-adjusted retail street prices of these three drugs declined.<sup>25</sup> Specifically, heroin purity increased by 60% ( $p = 0.568$ ), cocaine purity increased by 11% ( $p = 0.181$ ), and cannabis herb potency increased by 161% ( $p < 0.001$ ) during this time. During the same period, the prices of heroin, cocaine, and cannabis decreased 81% ( $p < 0.001$ ), 80% ( $p < 0.001$ ), and 86% ( $p < 0.001$ ) respectively.

Figure 2 presents data collected by the UNODC on the street price of cocaine and opiates in participating European countries (i.e., Austria, Belgium, Denmark, Finland, France, Germany, Greece, Italy, Luxembourg, Netherlands, Norway, Iceland, Portugal, Spain, Sweden, Switzerland, United Kingdom, and

Werb et al. Effectiveness of enforcement-based supply reduction...

1  
2  
3 Ireland).<sup>26</sup> In these countries, between 1990 and 2009, the aggregate average  
4  
5 retail street price of cocaine decreased by 51%, from \$198 USD per gram to \$98  
6  
7 USD per gram ( $p < 0.001$ ). Similarly, the aggregate average price of opiates in  
8  
9 Europe decreased 74%, from a high of \$295 USD per gram in 1990 to \$77 USD  
10  
11 per gram in 2009 ( $p < 0.001$ ).  
12  
13

14 Data from the Australian Illicit Drug Reporting System (IDRS) were  
15  
16 available from 2000 to 2010. IDRS data suggest that the price of illegal drugs in  
17  
18 Australia fluctuated substantially during this period. Specifically, after adjustment,  
19  
20 the price of heroin decreased by 49%, from approximately \$460 USD per gram to  
21  
22 approximately \$235 per gram ( $p < 0.001$ ), despite the well-described heroin  
23  
24 'drought' of 2001,<sup>27</sup> which saw a reduction in the supply and availability of heroin  
25  
26 in Australia. Additionally, the price of cocaine decreased 14% from approximately  
27  
28 \$255 AUD per gram to \$220 AUD per gram ( $p = 0.477$ ), and the price of  
29  
30 cannabis decreased 49% from approximately \$25 AUD per gram to \$13 AUD per  
31  
32 gram ( $p < 0.001$ ).<sup>28</sup>  
33  
34  
35  
36  
37

## 38 **Seizures**

### 39 *Domestic Markets*

40  
41  
42 Figure 3 presents data on cannabis and cocaine seizures in the US  
43  
44 between 1990 and 2010. As shown, data from the US Drug Enforcement  
45  
46 Administration's STRIDE surveillance system demonstrate that the amount of  
47  
48 cannabis herb seized by the Drug Enforcement Administration both in, and  
49  
50 destined for, the US rose 465%, from approximately 130,000 kilograms in 1990  
51  
52 to approximately 720,000 kilograms in 2010 ( $p < 0.001$ ). During this same period,  
53  
54 despite fluctuations, the amount of cocaine seized by the US Drug Enforcement  
55  
56  
57  
58  
59  
60

1  
2  
3  
4  
5  
6  
7  
8  
9  
10  
11  
12  
13  
14  
15  
16  
17  
18  
19  
20  
21  
22  
23  
24  
25  
26  
27  
28  
29  
30  
31  
32  
33  
34  
35  
36  
37  
38  
39  
40  
41  
42  
43  
44  
45  
46  
47  
48  
49  
50  
51  
52  
53  
54  
55  
56  
57  
58  
59  
60

Werb et al. Effectiveness of enforcement-based supply reduction...

Administration decreased 49%, from approximately 57,000 kilograms in 1990 to 29,000 in 2010 ( $p = 0.409$ ), while the amount of heroin seized increased 29% from approximately 535 kilograms in 1990 to 690 kilograms ( $p = 0.979$ , heroin seizure data not shown).<sup>29</sup>

Figure 4 presents data on cannabis, cocaine and heroin seizures in countries participating in the European Monitoring Centre for Drugs and Drug Addiction's Reitox surveillance network (i.e., European Union member countries, as well as Croatia, Norway, and Turkey), between 1995 and 2009. As can be seen, annual estimates of the quantity of both cocaine and cannabis herb seized fluctuated throughout this period; however, the quantity of heroin seized increased relatively steadily. Specifically, the number of kilograms of cannabis herb seized was at a low of approximately 57,000 kilograms in 1995, and peaked one year later in 1996 at approximately 138,000 kilograms ( $p = 0.446$ ). The number of cocaine seizures was at a low of approximately 21,000 kilograms in 1995, and peaked at approximately 121,000 kilograms in 2006 ( $p = 0.018$ ). Finally, the number of kilograms of heroin seized increased 380% from a low of approximately 5,000 in 1995 to a high of approximately 24,000 in 2009 ( $p < 0.001$ ).

### *Production Regions*

With respect to opiate seizures, the Golden Triangle includes parts of Thailand, Lao, Viet Nam and Myanmar, and according to the UNODC, this region is the second largest supplier of heroin globally, though production has declined throughout the last decade, with opium production decreasing by approximately 60% and 90% in Myanmar and Lao, respectively.<sup>30</sup> In this region, trends in

*Werb et al. Effectiveness of enforcement-based supply reduction...*

1  
2 seizures of opium have fluctuated; 3,198 kilograms of opium were seized in  
3  
4  
5 1990, with a high of 12,462 kilograms seized in 2007 before a steep decline to  
6  
7 1,225 kilograms in 2010 ( $p = 0.856$ ). Similarly, seizures of heroin fluctuated, with  
8  
9 a decrease of more than half, from 1,337 kilograms in 1990, to 627 kilograms in  
10  
11 2010 ( $p = 0.085$ ), and a peak of 1,565 kilograms seized in 2009. In Afghanistan,  
12  
13 which is believed to supply over 90% of the world's opium,<sup>30</sup> seizures of raw and  
14  
15 prepared opium increased by over 12,000%, from 453 kilograms in 1990 to  
16  
17 57,023 kilograms in 2010, and seizures of heroin increased by over 600%, from  
18  
19 1,256 kilograms in 1990 to 9,036 kilograms in 2010 (Note: missing data  
20  
21 prevented a trend test for annual opium and heroin seizures in Afghanistan).  
22  
23  
24

25  
26 With respect to cocaine seizures, according to the UNODC, Latin  
27  
28 America's Andean region, which includes Peru, Bolivia, and Colombia, is the  
29  
30 primary global supplier of this drug, as coca leaf is grown exclusively in this  
31  
32 region.<sup>31</sup> While seizures of cocaine in the Andean region decreased 81%, from  
33  
34 97,437 kilograms in 1990 to 17,835 kilograms in 2007 ( $p = 0.028$ ), seizures of  
35  
36 coca leaf increased 188% from 601,038 kilograms in 1990 to 1.73 million  
37  
38 kilograms in 2007 ( $p = 0.004$ ). During the same period, the area of coca  
39  
40 cultivation in this region declined slightly, from approximately 210,000 hectares to  
41  
42 180,000 hectares ( $p = 0.004$ ).  
43  
44  
45  
46

47  
48 Finally, according to the UNODC, major areas of cannabis cultivation exist  
49  
50 in North Africa, Afghanistan, and North America. These areas are net exporters  
51  
52 of cannabis, though most cannabis-producing countries also produce the drug for  
53  
54 internal consumption.<sup>20</sup> In North Africa (i.e., Algeria, Morocco, and Tunisia),  
55  
56 seizures of cannabis herb increased by 208% from 67,930 kilograms in 1990 to  
57  
58  
59  
60

1 *Werb et al. Effectiveness of enforcement-based supply reduction...*

2 209,445 kilograms in 2007 ( $p = 0.015$ ). In North America (i.e., Canada, the  
3 United States, and Mexico), seizures of cannabis herb increased by 288% from  
4 782,607 kilograms in 1990 to 3.05 million kilograms in 2007 ( $p < 0.001$ ). In  
5 Afghanistan, while data on cannabis herb seizures are not available, seizures of  
6 cannabis resin increased 630% from 5,068 kilograms in 1990 to 36,972  
7 kilograms in 2006 ( $p = 0.061$ ).  
8  
9  
10  
11  
12  
13  
14  
15  
16  
17  
18  
19  
20

## 21 **CONCLUSIONS**

22  
23  
24 Longitudinal data from government surveillance systems demonstrate that  
25 over the past two decades there has been a general pattern of increased illegal  
26 drug supply as defined through lower price and higher purity of heroin, cocaine  
27 and cannabis. During the same period, patterns of drug seizures either increased  
28 or remained stable, though the trends detected in some of these indicators did  
29 not reach statistical significance. As such, we conclude, consistent with previous  
30 studies,<sup>19</sup> that the global supply of illicit drugs has likely not been reduced in the  
31 previous two decades. In particular, the data presented in this study suggest that  
32 the supply of opiates and cannabis, in particular, have increased, given the  
33 increasing potency and decreasing prices of these illegal commodities. These  
34 results have implications for the development of evidence-based drug policies,  
35 particularly given the interest in novel drug policy approaches in a number of  
36 settings in Latin America, North America, and Europe.<sup>32-34</sup>  
37  
38  
39  
40  
41  
42  
43  
44  
45  
46  
47  
48  
49  
50  
51  
52  
53

54 As noted elsewhere,<sup>35, 36</sup> there are limitations of ecologic analyses based  
55 on international surveillance systems. First, some states collect little or no data  
56  
57  
58  
59  
60

*Werb et al. Effectiveness of enforcement-based supply reduction...*

1  
2  
3 on indicators of illegal drug supply, whereas other states spend significant energy  
4  
5 on monitoring drug availability. Second, even in states that closely track  
6  
7 indicators of supply, the degree to which seized samples of illegal drugs reflect  
8  
9 purity of retail drugs sold on the street is subject to variation, though where  
10  
11 possible we presented purity-adjusted prices to address this limitation.<sup>23</sup>  
12  
13 Nevertheless, the long-term trends in increasing purity and decreasing price  
14  
15 presented here likely reflect overall trends in many regions, though it should be  
16  
17 noted that in some regions (e.g., Europe), indicators of price and purity may have  
18  
19 been strongly influenced by a few countries such as the United Kingdom and  
20  
21 Spain. Additionally, some exceptions in the trends were observed. Australia for  
22  
23 instance, while experiencing a significant decrease in the prices of both heroin  
24  
25 and cannabis, did not experience a significant decrease in the price of cocaine,  
26  
27 which may reflect the geographic isolation of the region or other market factors. It  
28  
29 is also of note that Australia's 'heroin drought',<sup>37</sup> which saw a sudden drop in  
30  
31 measures of the supply and availability of heroin, appears to have had a limited  
32  
33 long-term impact on supply, though some experts suggest that it may have  
34  
35 resulted in higher levels of polysubstance use among Australian heroin  
36  
37 injectors.<sup>27</sup> Third, limitations in longitudinal data collection precluded our ability to  
38  
39 include amphetamine-type stimulants and other emerging synthetic substances,  
40  
41 as this data is limited to certain countries and the focus of this study was on  
42  
43 regional trends. It is noteworthy in this regard that the production of synthetic  
44  
45 substances – as well as indoor cannabis cultivation – present particular  
46  
47 challenges for supply reduction strategies, given that these drugs can be mass  
48  
49 produced in clandestine locations regardless of climate or other factors that limit  
50  
51  
52  
53  
54  
55  
56  
57  
58  
59  
60

1  
2  
3  
4  
5  
6  
7  
8  
9  
10  
11  
12  
13  
14  
15  
16  
17  
18  
19  
20  
21  
22  
23  
24  
25  
26  
27  
28  
29  
30  
31  
32  
33  
34  
35  
36  
37  
38  
39  
40  
41  
42  
43  
44  
45  
46  
47  
48  
49  
50  
51  
52  
53  
54  
55  
56  
57  
58  
59  
60

*Werb et al. Effectiveness of enforcement-based supply reduction...*

traditional drug production.<sup>20, 38</sup> Finally, while this review focused on patterns of price and purity of selected illegal drugs, these measures are only a marker of drug supply, and do not measure other factors determining availability and concomitant rates of drug use. These limitations to assessing global drug supply using classic proxy measures such as price, purity, and, to a lesser extent, seizures, suggests that there may be a need to expand the range of measures systematically collected by governments and international bodies such as the UNODC and the European Monitoring Centre for Drugs and Drug Addiction. In particular, meaningfully incorporating measures derived from street-level questionnaires of people who use drugs may provide a more reliable metric of supply and availability. Indeed, some bodies, such as Australia's IDRS, collect such data,<sup>28</sup> and this methodological approach should be considered by those coordinating surveillance of illegal drugs. Other bodies have also prioritized emphasizing measures of community health including reduced HIV infections, reduced drug-related violence and reductions in numbers of individuals incarcerated.<sup>39, 40</sup>

In summary, longitudinal illegal drug surveillance systems demonstrate a general global pattern of falling drug prices and increasing drug purity and potency, alongside a relatively consistent pattern of increasing seizures of illegal drugs. Although source data have limitations and there are some exceptions to these trends, these findings should be useful given the current debates and drug policy experimentation under way in Latin America, North America, and Europe.<sup>32-34</sup> It is hoped that this study highlights the need to re-examine the effectiveness of national and international drug strategies that place a



*Werb et al. Effectiveness of enforcement-based supply reduction...*

disproportionate emphasis on supply reduction at the expense of evidence-based prevention and treatment of problematic illegal drug use.

1  
2  
3  
4  
5  
6  
7  
8  
9  
10  
11  
12  
13  
14  
15  
16  
17  
18  
19  
20  
21  
22  
23  
24  
25  
26  
27  
28  
29  
30  
31  
32  
33  
34  
35  
36  
37  
38  
39  
40  
41  
42  
43  
44  
45  
46  
47  
48  
49  
50  
51  
52  
53  
54  
55  
56  
57  
58  
59  
60

For peer review only

1  
2  
3  
4  
5  
6  
7  
8  
9  
10  
11  
12  
13  
14  
15  
16  
17  
18  
19  
20  
21  
22  
23  
24  
25  
26  
27  
28  
29  
30  
31  
32  
33  
34  
35  
36  
37  
38  
39  
40  
41  
42  
43  
44  
45  
46  
47  
48  
49  
50  
51  
52  
53  
54  
55  
56  
57  
58  
59  
60

*Werb et al. Effectiveness of enforcement-based supply reduction...*

### **Acknowledgments:**

The authors would like to thank Deborah Graham, Peter Vann, Katherine Quayle, Samantha MacLean, and Kevin Lutz for their administrative assistance. Dan Werb is supported by the Canadian Institutes of Health Research. Thomas Kerr is supported by the Canadian Institutes of Health Research and the Michael Smith Foundation for Health Research.

### **Competing interests:**

All authors declare that (1) DW, TK, BN, JM and EW have support from the BC Centre for Excellence in HIV/AIDS for their submitted work; SS has support from the Division of Global Public Health, Department of Medicine, University of California, San Diego; (2) DW, TK, BN, SS, and EW have no relationships with companies that might have an interest in the submitted work in the previous 3 years; (3) their spouses, partners, or children have no financial relationships that may be relevant to the submitted work; and (4) DW, TK, BN, SS and EW have no non-financial interests that may be relevant to the submitted work. JM has received grants from, served as an ad hoc adviser to, or spoken at events sponsored by Abbott, Argos Therapeutics, Bioject Inc., Boehringer Ingelheim, BMS, Gilead Sciences, GlaxoSmithKline, Hoffmann-La Roche, Janssen-Ortho, Merck Frosst, Panacos, Pfizer Ltd., Schering, Serono Inc., TheraTechnologies, Tibotec (J&J), and Trimeris.

Werb et al. Effectiveness of enforcement-based supply reduction...

## References:

1. Pietschmann T, Walker J. Estimating illicit financial flows resulting from drug trafficking and other transnational organized crimes. Vienna: UNODC Studies and Threat Analysis Section, Division for Policy Analysis and Public Affairs; 2011.
2. Jurgens R, Ball A, Verster A. Interventions to reduce HIV transmission related to injecting drug use in prison. *Lancet Infect Dis.* 2009; **9**(1): 57-66.
3. Beyrer C, Malinowska-Sempruch K, Kamarulzaman A, Kazatchkine M, Sidibe M, Strathdee SA. Time to act: A call for comprehensive responses to HIV in people who use drugs *The Lancet.* 2010; **376**(9740): 551-63.
4. Coffin PO, Galea S, Ahern J, Leon AC, Vlahov D, Tardiff K. Opiates, cocaine, and alcohol combinations in accidental drug overdose deaths in New York City, 1990-98. *Addiction.* 2003; **98**(6): 739.
5. Garfield J, Drucker E. Fatal overdose trends in major US cities: 1990 - 1997. *Addictions Research and Theory.* 2001; **9**(5): 425.
6. Mathers BM, Degenhardt L, Phillips B, Wiessing L, Hickman M, Strathdee SA, et al. Global epidemiology of injecting drug use and HIV among people who inject drugs: A systematic review. *Lancet.* 2008; **372**(9651): 1733-45.
7. Shepard CW, Finelli L, Alter MJ. Global epidemiology of hepatitis C virus infection. *Lancet Infect Dis.* 2005; **5**(9): 558-67.
8. Werb D, Rowell G, Guyatt G, Kerr T, Montaner J, Wood E. Effect of drug law enforcement on drug market violence: A systematic review. *Int J Drug Pol.* 2011; **22**(2): 8.
9. ECOSOC. Convention on Psychotropic Substances, 1971. Vienna: United Nations Economic and Social Council; 1971.
10. ECOSOC. The Single Convention on Narcotic Drugs, 1961. As amended by the 1972 Protocol amending the Single Convention on Narcotic Drugs, 1961. Vienna: United Nations Economic and Social Council; 1972.
11. ECOSOC. United Nations Convention Against Illicit Traffic in Narcotic Drugs and Psychotropic Substances, 1988. Vienna: United Nations Economic and Social Council; 1988.

1  
2  
3  
4  
5  
6  
7  
8  
9  
10  
11  
12  
13  
14  
15  
16  
17  
18  
19  
20  
21  
22  
23  
24  
25  
26  
27  
28  
29  
30  
31  
32  
33  
34  
35  
36  
37  
38  
39  
40  
41  
42  
43  
44  
45  
46  
47  
48  
49  
50  
51  
52  
53  
54  
55  
56  
57  
58  
59  
60

Werb et al. Effectiveness of enforcement-based supply reduction...

12. Travis A. Home Office rejects decriminalising possession of drugs for personal use. *The Guardian*. 2011 October 14.
13. Hoeffel J. Federal crackdown on medical pot sales reflects a shift in policy. *Los Angeles Times*. 2011 October 7.
14. Greenwald G. Drug decriminalization in Portugal: Lessons for creating fair and successful drug policies. Washington, D.C.: Cato Institute; 2009.
15. Warren J, Gelb A, Horowitz J, Riordan J. One in 100: Behind bars in America 2008. Washington, D.C.: The Pew Center on the States; 2008.
16. Farrell G, Clark, K. What does the world spend on criminal justice? Helsinki: The European Institute for Criminal Prevention and Control, affiliated with the United Nations; 2004.
17. Walmsley R. World prison population list. Report. London: International Centre for Prison Studies; 2007.
18. UNODC. World Drug Report 2008. Vienna: United Nations Office on Drugs and Crime; 2008.
19. A report on global illicit drug markets, 1998-2007. Netherlands: European Commission Directorate-General on Justice, Freedom and Security; 2009.
20. UNODC. World Drug Report 2011. Vienna: United Nations Office on Drugs and Crime; 2011.
21. Roberts M, Bewley-Taylor DR, Trace M. Monitoring drug policy outcomes: the measurement of drug-related harm: Beckley Foundation Drug Policy Programme; 2006.
22. Lenke L. An analysis of the significance of supply and market factors for variations in European cannabis use. *EMCDDA Monographs*. 2008; 293.
23. Caulkins JP. Price and purity analysis for illicit drug: Data and conceptual issues. *Drug Alc Depend*. 2007; **90**: S61-S8.
24. Hartnoll R. Drug epidemiology in the European institutions: Historical background and key indicators. *Bulletin on Narcotics*. 2003; **55**(1): 53-72.
25. Fries A, Anthony RW, Cseko Jr. A, Gaither CC, Schulman E. The price and purity of illicit drugs: 1981 - 2007. Alexandria, VA: Institute for Defense Analyses; 2008.

Werb et al. Effectiveness of enforcement-based supply reduction...

- 1
  - 2
  - 3
  - 4
  - 5
  - 6
  - 7
  - 8
  - 9
  - 10
  - 11
  - 12
  - 13
  - 14
  - 15
  - 16
  - 17
  - 18
  - 19
  - 20
  - 21
  - 22
  - 23
  - 24
  - 25
  - 26
  - 27
  - 28
  - 29
  - 30
  - 31
  - 32
  - 33
  - 34
  - 35
  - 36
  - 37
  - 38
  - 39
  - 40
  - 41
  - 42
  - 43
  - 44
  - 45
  - 46
  - 47
  - 48
  - 49
  - 50
  - 51
  - 52
  - 53
  - 54
  - 55
  - 56
  - 57
  - 58
  - 59
  - 60
26. UNODC. World Drug Report 2010: Statistical Annex. Vienna: United Nations Office on Drugs and Crime; 2010.
27. Weatherburn D, Jones C, Freeman K, Makkai T. Supply control and harm reduction: lessons from the Australian heroin drought. *Addiction*. 2003; **98**: 83.
28. Stafford J, Burns L. Australian drug trends 2010: Findings from the Illicit Drug Reporting System (IDRS). Sydney: National Drug and Alcohol Research Centre; 2011.
29. DEA. STRIDE surveillance system. New York: United States Drug Enforcement Administration; 2011.
30. UNODC. World Drug Report 2010. Vienna: United Nations Office on Drugs and Crime; 2010.
31. ONDCP. Coca in the Andes. Washington, D.C.: Office of National Drug Control Policy; 2011.
32. Insulza JM. The drug problem in the Americas. Washington, DC: Organization of American States General Secretariat; 2013.
33. Harkinson J. Marijuana legalization may be unstoppable. *Mother Jones*. 2013 February 28.
34. EMCDDA. Drug Policy profiles: Portugal. Lisbon: European Monitoring Centre for Drugs and Drug Addiction; 2011.
35. Caulkins JP. Comment: Should the DEA's STRIDE data be used for economic analyses of markets for illegal drugs? *Journal of the American Statistical Association*. 2001; **96**(456): 1263-4.
36. Manski CF, Pepper J, Petrie C. Informing America's policy on illegal drugs: What we don't know keeps hurting us: National Academies Press; 2001.
37. Longo MC, Henry-Edwards SM, Humeniuk RE, Christie P, Ali RL. Impact of the heroin'drought'on patterns of drug use and drug-related harms. *Drug Alc Rev*. 2004; **23**(2): 143-50.
38. EMCDDA. Europol 2010 annual report on the implementation of council decision 2005/387/JHA. Lisbon: European Monitoring Centre for Drugs and Drug Addiction; 2010.

1  
2  
3  
4  
5  
6  
7  
8  
9  
10  
11  
12  
13  
14  
15  
16  
17  
18  
19  
20  
21  
22  
23  
24  
25  
26  
27  
28  
29  
30  
31  
32  
33  
34  
35  
36  
37  
38  
39  
40  
41  
42  
43  
44  
45  
46  
47  
48  
49  
50  
51  
52  
53  
54  
55  
56  
57  
58  
59  
60

*Werb et al. Effectiveness of enforcement-based supply reduction...*

39. Global Commission on Drug Policy. The War on Drugs and HIV/AIDS: How the criminalization of drug use fuels the global pandemic. Rio de Janeiro: Global Commission on Drug Policy; 2012.
40. Global Commission on Drug Policy. Report of the Global Commission on Drug Policy. Rio de Janeiro: Global Commission on Drug Policy; 2010.

For peer review only

Werb et al. Effectiveness of enforcement-based supply reduction...

**Table 1: Major Illegal Drug Data Surveillance Systems**

| Surveillance system                         | Country/Region | Inception Date | Illegal drugs considered |         |        | Outcomes considered |        |     |          | Summary of findings                                                                                                                |
|---------------------------------------------|----------------|----------------|--------------------------|---------|--------|---------------------|--------|-----|----------|------------------------------------------------------------------------------------------------------------------------------------|
|                                             |                |                | cannabis                 | cocaine | heroin | Price               | Purity | Use | Seizures |                                                                                                                                    |
| University of Mississippi Marijuana Project | USA            | 1975 -         | X                        |         |        |                     | X      |     |          | Cannabis potency increased between 1990 and 2009.                                                                                  |
| STRIDE Surveillance System                  | USA            | 1986-          | X                        | X       | X      | X                   | X      |     |          | Price decreased and purity/potency increased across all illegal drugs considered.                                                  |
| UNODC Drug Seizures Database                | International  | 1980 -         | X                        | X       | X      |                     |        |     | X        | Seizures of all drugs have increased between 1995 and 2006.                                                                        |
| UNODC Annual Reports Questionnaire          | International  | 1990 -         | X                        | X       | X      | X                   | X      | X   |          | Prices of opiates, cocaine, and cannabis have generally decreased in Europe and the US while purity and potency have increased.    |
| Reitox (EMCDDA database)                    | Europe         | 1993 -         | X                        | X       | X      | X                   |        |     | X        | Price of all illegal substances decreased in 2002 to 2007. Cocaine, cannabis, and heroin seizures increased between 2002 and 2007. |
| Illicit Drug Reporting System               | Australia      | 2000 -         | X                        | X       | X      | X                   | X      |     | X        | Between 2000 and 2010, the price of cocaine, cannabis and heroin decreased, while perceived purity remained stable.                |
| National Drug Threat Assessment             | USA            | 2001 -         | X                        | X       | X      | X                   |        |     | X        | Between 2005 and 2009, cocaine purity decreased whereas price increased.                                                           |

Note: STRIDE: System To Retrieve Information from Drug Evidence, EU = European Union, EC = European Commission; EMCDDA = European Monitoring Centre For Drugs and Drug Addiction; UNODC = United Nations Office of Drug Control

Werb et al. Effectiveness of enforcement-based supply reduction...

# The temporal relationship between drug supply indicators: An audit of international government surveillance systems

Dan Werb; Thomas Kerr; Bohdan Nosyk; Steffanie Strathdee; Julio Montaner; Evan Wood

**Dan Werb**, Senior Research Assistant, Urban Health Research Initiative, BC Centre for Excellence in HIV/AIDS, Vancouver, Canada, 608 – 1081 Burrard Street, Vancouver, B.C., Canada, V6Z 1Y6

**Thomas Kerr**, Director, Urban Health Research Initiative, BC Centre for Excellence in HIV/AIDS, Vancouver, Canada, 608 – 1081 Burrard Street, Vancouver, B.C., Canada, V6Z 1Y6

**Bohdan Nosyk**, Research Scientist, BC Centre for Excellence in HIV/AIDS, Vancouver, Canada, 608 – 1081 Burrard Street, Vancouver, B.C., Canada, V6Z 1Y6

**Steffanie Strathdee**, Associate Dean of Global Health Sciences, University of California San Diego, Institute of the Americas, 10111 N. Torrey Rd., La Jolla, CA, USA, 92093-0507

**Julio Montaner**, Director, BC Centre for Excellence in HIV/AIDS, Vancouver, Canada, 608 – 1081 Burrard Street, Vancouver, B.C., Canada, V6Z 1Y6

**Evan Wood**, Director, Urban Health Research Initiative, BC Centre for Excellence in HIV/AIDS, Vancouver, Canada, 608 – 1081 Burrard Street, Vancouver, B.C., Canada, V6Z 1Y6

**Send correspondence to:** Evan Wood, MD, PhD ABIM FRCPC  
Professor of Medicine, University of British Columbia  
BC Centre for Excellence in HIV/AIDS  
608-1081 Burrard Street, Vancouver, B.C. V6Z 1Y6  
CANADA  
Tel: (604) 806-9116  
Fax: (604) 806-9044  
Email: uhri-ew@cfenet.ubc.ca

**Word Count:** 2,575

**Tables:** 1

**Figures:** 4



*Werb et al. Effectiveness of enforcement-based supply reduction...*

**Revised:** June 7, 2013

**Printed:** June 7, 2013

1  
2  
3  
4  
5  
6  
7  
8  
9  
10  
11  
12  
13  
14  
15  
16  
17  
18  
19  
20  
21  
22  
23  
24  
25  
26  
27  
28  
29  
30  
31  
32  
33  
34  
35  
36  
37  
38  
39  
40  
41  
42  
43  
44  
45  
46  
47  
48  
49  
50  
51  
52  
53  
54  
55  
56  
57  
58  
59  
60

For peer review only

1  
2  
3  
4  
5  
6  
7  
8  
9  
10  
11  
12  
13  
14  
15  
16  
17  
18  
19  
20  
21  
22  
23  
24  
25  
26  
27  
28  
29  
30  
31  
32  
33  
34  
35  
36  
37  
38  
39  
40  
41  
42  
43  
44  
45  
46  
47  
48  
49  
50  
51  
52  
53  
54  
55  
56  
57  
58  
59  
60

Werb et al. Effectiveness of enforcement-based supply reduction...

## ABSTRACT

**Objectives:** Illegal drug use continues to be a major threat to community health and safety. We used international drug surveillance databases to assess the **relationship between multiple** long-term estimates of illegal drug price and purity.

**Design:** We systematically searched for longitudinal measures of illegal drug supply indicators to assess the long-term impact of enforcement-based supply reduction interventions.

**Setting:** Data from identified illegal drug surveillance systems were analysed using an *a priori* defined protocol in which we sought to present annual estimates beginning in 1990. Data were then subjected to trend analyses.

**Main Outcome Measures:** Data were obtained from government surveillance systems assessing price, purity, and/or seizure **quantities** of illegal drugs; systems with at least 10 years of longitudinal data assessing price, purity/potency, or seizures were included.

**Results:** We identified 7 **regional/international meta-surveillance** systems with longitudinal measures of price or purity/potency that met eligibility criteria. In the United States, the average inflation- and purity-adjusted prices of heroin, cocaine, and cannabis decreased by 81%, 80% and 86% respectively between 1990 and 2007, whereas average purity increased by 60%, 11%, and 161% respectively. Similar trends were observed in Europe, where during the same period the average inflation-adjusted price of opiates and cocaine decreased by 74% and 51% respectively. In Australia, the average inflation-adjusted price of cocaine decreased 14%, while the inflation-adjusted price of heroin and cannabis both decreased 49% between 2000 and 2010. During this time, seizures of these drugs in major production regions and major domestic markets generally increased.

**Conclusions:** With few exceptions and despite increasing investments in enforcement-based supply reduction efforts aimed at disrupting global drug supply, illegal drug prices have generally decreased while drug purity has generally increased since 1990. These findings suggest that expanding efforts at controlling the global illegal drug market through law enforcement are failing.

Word count: 300

Werb et al. Effectiveness of enforcement-based supply reduction...

## Article Summary

### Article focus

- Studies have demonstrated that illegal drug use remains a threat to community health and safety.
- However, less is known regarding the long-term impact of efforts to reduce the overall supply of illegal drugs.

### Key messages

- Using longitudinal governmental surveillance data, this study demonstrates that over the past two decades, the supply of major illegal drugs has increased, as measured through a general decline in the price, and a general increase in the purity of illegal drugs in a variety of settings.

### Strengths and limitations

- This study was limited by the quality and consistency of surveillance data on illegal drug supply
- This study presents data on trends in illegal drug supply in a variety of settings **over two decades**, including consumer and export drug markets

1  
2  
3  
4  
5  
6  
7  
8  
9  
10  
11  
12  
13  
14  
15  
16  
17  
18  
19  
20  
21  
22  
23  
24  
25  
26  
27  
28  
29  
30  
31  
32  
33  
34  
35  
36  
37  
38  
39  
40  
41  
42  
43  
44  
45  
46  
47  
48  
49  
50  
51  
52  
53  
54  
55  
56  
57  
58  
59  
60

Werb et al. Effectiveness of enforcement-based supply reduction...

## OBJECTIVES

The United Nations (UN) recently estimated that the global illegal drug trade is worth at least \$350 billion USD annually,<sup>1</sup> and illegal drug use remains a major threat to community health and safety.<sup>2, 3</sup> In addition to the range of harms associated with the direct health effects of drugs, including fatal overdose,<sup>4, 5</sup> illegal drug use is also one of the key global drivers of blood borne disease transmission, in particular human immunodeficiency virus (HIV) infection.<sup>6, 7</sup> Illegal drug markets also contribute to community concerns such as high rates of violence in settings where the trade proliferates.<sup>8</sup>

In response to the health and social concerns associated with illegal drug use, several UN conventions were created to **control** the possession, consumption, and manufacture of illegal drugs.<sup>9-11</sup> **As a result**, over the last several decades, most national drug control strategies have prioritized drug law enforcement interventions to reduce drug supply, despite recent calls by experts to explore alternative models of drug control **such as systems of drug decriminalization and legal regulation.**<sup>12-14</sup> Some unintended consequences of this approach, such as record incarceration rates, have been well-documented.<sup>15-18</sup> **Additionally, a small number of studies assessing aspects of drug supply, measured through indicators of drug price, purity/potency and seizures, have been undertaken to describe the global relationship between these indicators over the long-term.**<sup>19</sup> However, **systematic evaluation of these relationships is still needed to elucidate patterns of drug supply.** The present study therefore sought to systematically identify international data from

1 *Werb et al. Effectiveness of enforcement-based supply reduction...*

2 publicly available illegal drug surveillance systems to assess long-term estimates  
3 of illegal drug supply.  
4  
5  
6

## 7 DESIGN

### 8 ***Outcomes of interest***

9  
10 The primary outcomes of interest were long-term patterns of illegal drug  
11 supply, measured through indicators of price and purity/potency for three major  
12 illegal drugs: cannabis, cocaine, and opiates (e.g., opium and heroin). **While**  
13 **data on amphetamine-type stimulants exist in some specific countries (e.g.,**  
14 **the United Kingdom), this class of drugs was not included given**  
15 **inconsistent data collection and classification, and fluctuating surveillance**  
16 **periods and overall data quality.** A secondary outcome of interest was **data on**  
17 **illegal drug seizures in a) major illegal drug source regions and, b) major**  
18 **destination markets, as identified by the United Nations Office on Drugs and**  
19 **Crime (UNODC).<sup>20</sup> These secondary outcome data were used as an additional**  
20 **proxy measure to assess the availability of illegal drugs in specific regions, as**  
21 **has been done previously.<sup>21, 22</sup> All outcomes were systematically identified**  
22 **through publicly available illegal drug surveillance systems. Linear by linear**  
23 **association trend tests were carried out on annualized estimates of all outcomes**  
24 **of interest. All price estimates are expressed in 2011 USD and are, where**  
25 **possible, adjusted for purity.<sup>23</sup>**  
26  
27  
28  
29  
30  
31  
32  
33  
34  
35  
36  
37  
38  
39  
40  
41  
42  
43  
44  
45  
46  
47  
48  
49

### 50 ***Illegal drug surveillance systems***

51  
52 **An online search of surveillance systems monitoring illegal drugs**  
53 **using two a priori defined inclusion criteria was carried out.** First, because  
54 we specifically sought to assess the long-term impact of enforcement-based  
55  
56  
57  
58  
59  
60

1 *Werb et al. Effectiveness of enforcement-based supply reduction...*

2 supply reduction strategies on illegal drug price and purity/potency, only  
3 surveillance systems that included continuous longitudinal assessments of these  
4 outcomes of interest for at least 10 years were prioritized for inclusion. Second,  
5 data extraction was restricted to 1990 and onwards to focus on patterns of supply  
6 during recent decades.  
7  
8  
9  
10  
11  
12

13  
14 **Data were obtained through systematic searches of registries of**  
15 **surveillance systems (e.g., governmental websites, United Nations**  
16 **databases),** governmental reports, and peer-reviewed publications, as well as  
17 through data requests to relevant organizations including the UNODC. All authors  
18 had complete access to all data and all had final responsibility to submit for  
19 publication. Ethics approval was not required given that we relied exclusively on  
20 publicly available data.  
21  
22  
23  
24  
25  
26  
27  
28  
29

### 30 **RESULTS**

31  
32 We identified 7 government surveillance systems that met inclusion  
33 criteria. Of these, 3 (43%) reported on international data, 3 (43%) reported on  
34 data from the United States (US), and 1 (14%) reported on data from Australia.  
35  
36 **One of the** longest-running surveillance system identified, the US-based  
37 Marijuana Potency Monitoring Project, is funded by the U.S. National Institutes of  
38 Health and was established in 1975, while the most recent surveillance system  
39 was established in 2001 (e.g., the US-based *National Drug Threat Assessment*).  
40  
41 With respect to international surveillance systems, the UNODC administers two  
42 separate surveillance systems that collect data from all participating United  
43 Nations member states: the Annual Reports Questionnaire surveillance system  
44 that collects price and purity/potency data, and the Drug Seizures Database that  
45  
46  
47  
48  
49  
50  
51  
52  
53  
54  
55  
56  
57  
58  
59  
60

Werb et al. Effectiveness of enforcement-based supply reduction...

1  
2  
3 collects seizure data. Finally, the European Monitoring Centre for Drugs and  
4  
5 Drug Addiction administers the Reitox drug surveillance system network, which  
6  
7 aggregates data from a number of country-level surveillance systems in Europe,  
8  
9 as described below.<sup>24</sup>

### 11 **Price and Purity/Potency**

12  
13  
14 Table 1 presents surveillance systems that matched search criteria. An  
15  
16 assessment of data provided by these surveillance systems demonstrated a  
17  
18 number of broad trends. First, purity and/or potency of illegal drugs generally  
19  
20 remained stable or increased overall during the study period. Second, the price of  
21  
22 illegal drugs, with few exceptions, generally decreased. Third, seizures of  
23  
24 cannabis, cocaine and opiates generally increased in major drug production  
25  
26 regions and major domestic markets.  
27  
28  
29

30  
31 Figure 1 presents data from the US Drug Enforcement Administration's  
32  
33 System To Retrieve Information from Drug Evidence (STRIDE). As can be seen,  
34  
35 between 1990 and 2007 (the last year for which data are publicly available), the  
36  
37 purity of heroin and cocaine, and the potency of cannabis **herb** in the US  
38  
39 increased, while the inflation- and purity-adjusted **retail street** prices of these  
40  
41 three drugs declined.<sup>25</sup> Specifically, heroin purity increased by 60% ( $p = 0.568$ ),  
42  
43 cocaine purity increased by 11% ( $p = 0.181$ ), and cannabis **herb** potency  
44  
45 increased by 161% ( $p < 0.001$ ) during this time. During the same period, the  
46  
47 prices of heroin, cocaine, and cannabis decreased 81% ( $p < 0.001$ ), 80% ( $p <$   
48  
49  $0.001$ ), and 86% ( $p < 0.001$ ) respectively.  
50  
51  
52  
53

54  
55 Figure 2 presents data collected by the UNODC on the street price of  
56  
57 cocaine and opiates in participating European countries (i.e., Austria, Belgium,  
58  
59  
60

1  
2  
3  
4  
5  
6  
7  
8  
9  
10  
11  
12  
13  
14  
15  
16  
17  
18  
19  
20  
21  
22  
23  
24  
25  
26  
27  
28  
29  
30  
31  
32  
33  
34  
35  
36  
37  
38  
39  
40  
41  
42  
43  
44  
45  
46  
47  
48  
49  
50  
51  
52  
53  
54  
55  
56  
57  
58  
59  
60

Werb et al. Effectiveness of enforcement-based supply reduction...

Denmark, Finland, France, Germany, Greece, Italy, Luxembourg, Netherlands, Norway, Iceland, Portugal, Spain, Sweden, Switzerland, United Kingdom, and Ireland).<sup>26</sup> In these countries, between 1990 and 2009, the aggregate average retail street price of cocaine decreased by 51%, from \$198 USD per gram to \$98 USD per gram ( $p < 0.001$ ). Similarly, the aggregate average price of opiates in Europe decreased 74%, from a high of \$295 USD per gram in 1990 to \$77 USD per gram in 2009 ( $p < 0.001$ ).

Data from the Australian Illicit Drug Reporting System (IDRS) were available from 2000 to 2010. IDRS data suggest that the price of illegal drugs in Australia fluctuated substantially during this period. Specifically, after adjustment, the price of heroin decreased by 49%, from approximately \$460 USD per gram to approximately \$235 per gram ( $p < 0.001$ ), **despite the well-described heroin 'drought' of 2001,<sup>27</sup> which saw a reduction in the supply and availability of heroin in Australia. Additionally,** the price of cocaine decreased 14% from approximately \$255 AUD per gram to \$220 AUD per gram ( $p = 0.477$ ), and the price of cannabis decreased 49% from approximately \$25 AUD per gram to \$13 AUD per gram ( $p < 0.001$ ).<sup>28</sup>

## Seizures

### Domestic Markets

Figure 3 presents data on cannabis and cocaine seizures in the US between 1990 and 2010. As shown, data from the US Drug Enforcement Administration's STRIDE surveillance system demonstrate that the amount of cannabis herb seized by the Drug Enforcement Administration both in, and destined for, the US rose 465%, from approximately 130,000 kilograms in 1990



1 *Werb et al. Effectiveness of enforcement-based supply reduction...*

2 to approximately 720,000 kilograms in 2010 ( $p < 0.001$ ). During this same period,  
3  
4 despite fluctuations, the amount of cocaine seized by the US Drug Enforcement  
5 Administration decreased 49%, from approximately 57,000 kilograms in 1990 to  
6 29,000 in 2010 ( $p = 0.409$ ), while the amount of heroin seized increased 29%  
7 from approximately 535 kilograms in 1990 to 690 kilograms ( $p = 0.979$ , heroin  
8 seizure data not shown).<sup>29</sup>

9  
10  
11  
12  
13  
14  
15  
16  
17 Figure 4 presents data on cannabis, cocaine and heroin seizures in  
18 countries participating in the European Monitoring Centre for Drugs and Drug  
19 Addiction's Reitox surveillance network (i.e., European Union member countries,  
20 as well as Croatia, Norway, and Turkey), between 1995 and 2009. As can be  
21 seen, annual estimates of the quantity of both cocaine and cannabis **herb** seized  
22 fluctuated throughout this period; however, the quantity of heroin seized  
23 increased relatively steadily. Specifically, the number of kilograms of cannabis  
24 herb seized was at a low of approximately 57,000 kilograms in 1995, and peaked  
25 one year later in 1996 at approximately 138,000 kilograms ( $p = 0.446$ ). The  
26 number of cocaine seizures was at a low of approximately 21,000 kilograms in  
27 1995, and peaked at approximately 121,000 kilograms in 2006 ( $p = 0.018$ ).  
28 Finally, the number of kilograms of heroin seized increased 380% from a low of  
29 approximately 5,000 in 1995 to a high of approximately 24,000 in 2009 ( $p <$   
30 0.001).  
31  
32  
33  
34  
35  
36  
37  
38  
39  
40  
41  
42  
43  
44  
45  
46  
47  
48

#### 49 *Production Regions*

50  
51  
52 **With respect to opiate seizures, the Golden Triangle includes parts of**  
53 **Thailand, Lao, Viet Nam and Myanmar, and according to the UNODC, this**  
54 **region is the second largest supplier of heroin globally, though production**  
55  
56  
57  
58  
59  
60

1  
2  
3  
4  
5  
6  
7  
8  
9  
10  
11  
12  
13  
14  
15  
16  
17  
18  
19  
20  
21  
22  
23  
24  
25  
26  
27  
28  
29  
30  
31  
32  
33  
34  
35  
36  
37  
38  
39  
40  
41  
42  
43  
44  
45  
46  
47  
48  
49  
50  
51  
52  
53  
54  
55  
56  
57  
58  
59  
60

*Werb et al. Effectiveness of enforcement-based supply reduction...*

has declined throughout the last decade, with opium production decreasing by approximately 60% and 90% in Myanmar and Lao, respectively.<sup>30</sup> In this region, trends in seizures of opium have fluctuated; 3,198 kilograms of opium were seized in 1990, with a high of 12,462 kilograms seized in 2007 before a steep decline to 1,225 kilograms in 2010 ( $p = 0.856$ ). Similarly, seizures of heroin fluctuated, with a decrease of more than half, from 1,337 kilograms in 1990, to 627 kilograms in 2010 ( $p = 0.085$ ), and a peak of 1,565 kilograms seized in 2009. In Afghanistan, which is believed to supply over 90% of the world's opium,<sup>30</sup> seizures of raw and prepared opium increased by over 12,000%, from 453 kilograms in 1990 to 57,023 kilograms in 2010, and seizures of heroin increased by over 600%, from 1,256 kilograms in 1990 to 9,036 kilograms in 2010 (Note: missing data prevented a trend test for annual opium and heroin seizures in Afghanistan).

With respect to cocaine seizures, according to the UNODC, Latin America's Andean region, which includes Peru, Bolivia, and Colombia, is the primary global supplier of this drug, as coca leaf is grown exclusively in this region.<sup>31</sup> While seizures of cocaine in the Andean region decreased 81%, from 97,437 kilograms in 1990 to 17,835 kilograms in 2007 ( $p = 0.028$ ), seizures of coca leaf increased 188% from 601,038 kilograms in 1990 to 1.73 million kilograms in 2007 ( $p = 0.004$ ). During the same period, the area of coca cultivation in this region declined slightly, from approximately 210,000 hectares to 180,000 hectares ( $p = 0.004$ ).

1 *Werb et al. Effectiveness of enforcement-based supply reduction...*

2  
3 Finally, according to the UNODC, major areas of cannabis cultivation exist  
4 in North Africa, Afghanistan, and North America. These areas are net exporters  
5 of cannabis, though most cannabis-producing countries also produce the drug for  
6 internal consumption.<sup>20</sup> In North Africa (i.e., Algeria, Morocco, and Tunisia),  
7 seizures of cannabis herb increased by 208% from 67,930 kilograms in 1990 to  
8 209,445 kilograms in 2007 ( $p = 0.015$ ). In North America (i.e., Canada, the  
9 United States, and Mexico), seizures of cannabis herb increased by 288% from  
10 782,607 kilograms in 1990 to 3.05 million kilograms in 2007 ( $p < 0.001$ ). In  
11 Afghanistan, while data on cannabis herb seizures are not available, seizures of  
12 cannabis resin increased 630% from 5,068 kilograms in 1990 to 36,972  
13 kilograms in 2006 ( $p = 0.061$ ).  
14  
15  
16  
17  
18  
19  
20  
21  
22  
23  
24  
25  
26  
27

## 28 CONCLUSIONS

29  
30  
31 Longitudinal data from government surveillance systems demonstrate that  
32 over the past two decades there has been a general pattern of increased illegal  
33 drug supply as defined through lower price and higher purity of heroin, cocaine  
34 and cannabis. During the same period, patterns of drug seizures either increased  
35 or remained stable, though the trends detected in some of these indicators did  
36 not reach statistical significance. **As such, we conclude, consistent with  
37 previous studies,<sup>19</sup> that the global supply of illicit drugs has likely not been  
38 reduced in the previous two decades. In particular, the data presented in  
39 this study suggest that the supply of opiates and cannabis, in particular,  
40 have increased, given the increasing potency and decreasing prices of  
41 these illegal commodities. These results have implications for the  
42 development of evidence-based drug policies, particularly given the  
43  
44  
45  
46  
47  
48  
49  
50  
51  
52  
53  
54  
55  
56  
57  
58  
59  
60**

1  
2  
3  
4  
5  
6  
7  
8  
9  
10  
11  
12  
13  
14  
15  
16  
17  
18  
19  
20  
21  
22  
23  
24  
25  
26  
27  
28  
29  
30  
31  
32  
33  
34  
35  
36  
37  
38  
39  
40  
41  
42  
43  
44  
45  
46  
47  
48  
49  
50  
51  
52  
53  
54  
55  
56  
57  
58  
59  
60

Werb et al. Effectiveness of enforcement-based supply reduction...

**interest in novel drug policy approaches in a number of settings in Latin America, North America, and Europe.<sup>32-34</sup>**

As noted elsewhere,<sup>35, 36</sup> there are limitations of ecologic analyses based on international surveillance systems. First, some states collect little or no data on indicators of illegal drug supply, whereas other states spend significant energy on monitoring drug availability. Second, even in states that closely track indicators of supply, the degree to which seized samples of illegal drugs reflect purity of retail drugs sold on the street is subject to variation, though where possible we presented purity-adjusted prices to address this limitation.<sup>23</sup> Nevertheless, the long-term trends in increasing purity and decreasing price presented here likely reflect overall trends in many regions, **though it should be noted that in some regions (e.g., Europe), indicators of price and purity may have been strongly influenced by a few countries such as the United Kingdom and Spain. Additionally, some exceptions in the trends were observed.** Australia for instance, while experiencing a significant decrease in the prices of both heroin and cannabis, did not experience a significant decrease in the price of cocaine, which may reflect the geographic isolation of the region or other market factors. **It is also of note that Australia's 'heroin drought',<sup>37</sup> which saw a sudden drop in measures of the supply and availability of heroin, appears to have had a limited long-term impact on supply, though some experts suggest that it may have resulted in higher levels of polysubstance use among Australian heroin injectors.<sup>27</sup>** Third, limitations in longitudinal data collection precluded our ability to include amphetamine-type stimulants and other emerging synthetic substances, as this data is

*Werb et al. Effectiveness of enforcement-based supply reduction...*

1  
2  
3 **limited to certain countries and the focus of this study was on regional**  
4  
5 **trends. It is noteworthy in this regard that the production of synthetic**  
6  
7 **substances – as well as indoor cannabis cultivation – present particular**  
8  
9 **challenges for supply reduction strategies,** given that these drugs can be  
10  
11 mass produced in clandestine locations regardless of climate or other factors that  
12  
13 limit traditional drug production.<sup>20, 38</sup> Finally, while this review focused on  
14  
15 **patterns of price and purity of selected illegal drugs,** these measures are only a  
16  
17 marker of drug supply, and do not measure other factors determining availability  
18  
19 and concomitant rates of drug use. **These limitations to assessing global drug**  
20  
21 **supply using classic proxy measures such as price, purity, and, to a lesser**  
22  
23 **extent, seizures, suggests that there may be a need to expand the range of**  
24  
25 **measures systematically collected by governments and international**  
26  
27 **bodies such as the UNODC and the European Monitoring Centre for Drugs**  
28  
29 **and Drug Addiction. In particular, meaningfully incorporating measures**  
30  
31 **derived from street-level questionnaires of people who use drugs may**  
32  
33 **provide a more reliable metric of supply and availability. Indeed, some**  
34  
35 **bodies, such as Australia’s IDRS, collect such data,<sup>28</sup> and this**  
36  
37 **methodological approach should be considered by those coordinating**  
38  
39 **surveillance of illegal drugs. Other bodies have also prioritized**  
40  
41 **emphasizing measures of community health including reduced HIV**  
42  
43 **infections, reduced drug-related violence and reductions in numbers of**  
44  
45 **individuals incarcerated.<sup>39, 40</sup>**

54  
55 In summary, longitudinal illegal drug surveillance systems demonstrate a  
56  
57 general global pattern of falling drug prices and increasing drug purity and  
58  
59  
60

1 *Werb et al. Effectiveness of enforcement-based supply reduction...*

2 potency, alongside a relatively consistent pattern of increasing seizures of illegal  
3 drugs. **Although source data have limitations and there are some**  
4 **exceptions to these trends, these findings should be useful given the**  
5 **current debates and drug policy experimentation under way in Latin**  
6 **America, North America, and Europe.<sup>32-34</sup> It is hoped that this study**  
7 **highlights the need to re-examine the effectiveness of national and**  
8 **international drug strategies that place a disproportionate emphasis on**  
9 **supply reduction at the expense of evidence-based prevention and**  
10 **treatment of problematic illegal drug use.**  
11  
12  
13  
14  
15  
16  
17  
18  
19  
20  
21  
22  
23  
24  
25  
26  
27  
28  
29  
30  
31  
32  
33  
34  
35  
36  
37  
38  
39  
40  
41  
42  
43  
44  
45  
46  
47  
48  
49  
50  
51  
52  
53  
54  
55  
56  
57  
58  
59  
60

1 *Werb et al. Effectiveness of enforcement-based supply reduction...*

2  
3 **Acknowledgments:**

4 The authors would like to thank Deborah Graham, Peter Vann, Katherine Quayle,  
5 Samantha MacLean, and Kevin Lutz for their administrative assistance. Dan  
6  
7 Werb is supported by the Canadian Institutes of Health Research. Thomas Kerr  
8 is supported by the Canadian Institutes of Health Research and the Michael  
9  
10 Smith Foundation for Health Research.  
11  
12  
13  
14  
15  
16  
17  
18

19 **Competing interests:**

20  
21 All authors declare that (1) DW, TK, BN, JM and EW have support from the BC  
22 Centre for Excellence in HIV/AIDS for their submitted work; SS has support from  
23 the Division of Global Public Health, Department of Medicine, University of  
24 California, San Diego; (2) DW, TK, BN, SS, and EW have no relationships with  
25 companies that might have an interest in the submitted work in the previous 3  
26 years; (3) their spouses, partners, or children have no financial relationships that  
27 may be relevant to the submitted work; and (4) DW, TK, BN, SS and EW have no  
28 non-financial interests that may be relevant to the submitted work. JM has  
29 received grants from, served as an ad hoc adviser to, or spoken at events  
30 sponsored by Abbott, Argos Therapeutics, Bioject Inc., Boehringer Ingelheim,  
31 BMS, Gilead Sciences, GlaxoSmithKline, Hoffmann-La Roche, Janssen-Ortho,  
32 Merck Frosst, Panacos, Pfizer Ltd., Schering, Serono Inc., TheraTechnologies,  
33 Tibotec (J&J), and Trimeris.  
34  
35  
36  
37  
38  
39  
40  
41  
42  
43  
44  
45  
46  
47  
48  
49  
50  
51  
52  
53  
54  
55  
56  
57  
58  
59  
60

Werb et al. Effectiveness of enforcement-based supply reduction...

## References:

1. Pietschmann T, Walker J. Estimating illicit financial flows resulting from drug trafficking and other transnational organized crimes. Vienna: UNODC Studies and Threat Analysis Section, Division for Policy Analysis and Public Affairs; 2011.
2. Jurgens R, Ball A, Verster A. Interventions to reduce HIV transmission related to injecting drug use in prison. *Lancet Infect Dis.* 2009; **9**(1): 57-66.
3. Beyrer C, Malinowska-Sempruch K, Kamarulzaman A, Kazatchkine M, Sidibe M, Strathdee SA. Time to act: A call for comprehensive responses to HIV in people who use drugs *The Lancet.* 2010; **376**(9740): 551-63.
4. Coffin PO, Galea S, Ahern J, Leon AC, Vlahov D, Tardiff K. Opiates, cocaine, and alcohol combinations in accidental drug overdose deaths in New York City, 1990-98. *Addiction.* 2003; **98**(6): 739.
5. Garfield J, Drucker E. Fatal overdose trends in major US cities: 1990 - 1997. *Addictions Research and Theory.* 2001; **9**(5): 425.
6. Mathers BM, Degenhardt L, Phillips B, Wiessing L, Hickman M, Strathdee SA, et al. Global epidemiology of injecting drug use and HIV among people who inject drugs: A systematic review. *Lancet.* 2008; **372**(9651): 1733-45.
7. Shepard CW, Finelli L, Alter MJ. Global epidemiology of hepatitis C virus infection. *Lancet Infect Dis.* 2005; **5**(9): 558-67.
8. Werb D, Rowell G, Guyatt G, Kerr T, Montaner J, Wood E. Effect of drug law enforcement on drug market violence: A systematic review. *Int J Drug Pol.* 2011; **22**(2): 8.
9. ECOSOC. Convention on Psychotropic Substances, 1971. Vienna: United Nations Economic and Social Council; 1971.
10. ECOSOC. The Single Convention on Narcotic Drugs, 1961. As amended by the 1972 Protocol amending the Single Convention on Narcotic Drugs, 1961. Vienna: United Nations Economic and Social Council; 1972.
11. ECOSOC. United Nations Convention Against Illicit Traffic in Narcotic Drugs and Psychotropic Substances, 1988. Vienna: United Nations Economic and Social Council; 1988.



Werb et al. Effectiveness of enforcement-based supply reduction...

12. Travis A. Home Office rejects decriminalising possession of drugs for personal use. *The Guardian*. 2011 October 14.
13. Hoeffel J. Federal crackdown on medical pot sales reflects a shift in policy. *Los Angeles Times*. 2011 October 7.
14. Greenwald G. Drug decriminalization in Portugal: Lessons for creating fair and successful drug policies. Washington, D.C.: Cato Institute; 2009.
15. Warren J, Gelb A, Horowitz J, Riordan J. One in 100: Behind bars in America 2008. Washington, D.C.: The Pew Center on the States; 2008.
16. Farrell G, Clark, K. What does the world spend on criminal justice? Helsinki: The European Institute for Criminal Prevention and Control, affiliated with the United Nations; 2004.
17. Walmsley R. World prison population list. Report. London: International Centre for Prison Studies; 2007.
18. UNODC. World Drug Report 2008. Vienna: United Nations Office on Drugs and Crime; 2008.
19. A report on global illicit drug markets, 1998-2007. Netherlands: European Commission Directorate-General on Justice, Freedom and Security; 2009.
20. UNODC. World Drug Report 2011. Vienna: United Nations Office on Drugs and Crime; 2011.
21. Roberts M, Bewley-Taylor DR, Trace M. Monitoring drug policy outcomes: the measurement of drug-related harm: Beckley Foundation Drug Policy Programme; 2006.
22. Lenke L. An analysis of the significance of supply and market factors for variations in European cannabis use. *EMCDDA Monographs*. 2008; 293.
23. Caulkins JP. Price and purity analysis for illicit drug: Data and conceptual issues. *Drug Alc Depend*. 2007; **90**: S61-S8.
24. Hartnoll R. Drug epidemiology in the European institutions: Historical background and key indicators. *Bulletin on Narcotics*. 2003; **55**(1): 53-72.
25. Fries A, Anthony RW, Cseko Jr. A, Gaither CC, Schulman E. The price and purity of illicit drugs: 1981 - 2007. Alexandria, VA: Institute for Defense Analyses; 2008.

1  
2  
3  
4  
5  
6  
7  
8  
9  
10  
11  
12  
13  
14  
15  
16  
17  
18  
19  
20  
21  
22  
23  
24  
25  
26  
27  
28  
29  
30  
31  
32  
33  
34  
35  
36  
37  
38  
39  
40  
41  
42  
43  
44  
45  
46  
47  
48  
49  
50  
51  
52  
53  
54  
55  
56  
57  
58  
59  
60

Werb et al. Effectiveness of enforcement-based supply reduction...

26. UNODC. World Drug Report 2010: Statistical Annex. Vienna: United Nations Office on Drugs and Crime; 2010.
27. Weatherburn D, Jones C, Freeman K, Makkai T. Supply control and harm reduction: lessons from the Australian heroin drought. *Addiction*. 2003; **98**: 83.
28. Stafford J, Burns L. Australian drug trends 2010: Findings from the Illicit Drug Reporting System (IDRS). Sydney: National Drug and Alcohol Research Centre; 2011.
29. DEA. STRIDE surveillance system. New York: United States Drug Enforcement Administration; 2011.
30. UNODC. World Drug Report 2010. Vienna: United Nations Office on Drugs and Crime; 2010.
31. ONDCP. Coca in the Andes. Washington, D.C.: Office of National Drug Control Policy; 2011.
32. Insulza JM. The drug problem in the Americas. Washington, DC: Organization of American States General Secretariat; 2013.
33. Harkinson J. Marijuana legalization may be unstoppable. *Mother Jones*. 2013 February 28.
34. EMCDDA. Drug Policy profiles: Portugal. Lisbon: European Monitoring Centre for Drugs and Drug Addiction; 2011.
35. Caulkins JP. Comment: Should the DEA's STRIDE data be used for economic analyses of markets for illegal drugs? *Journal of the American Statistical Association*. 2001; **96**(456): 1263-4.
36. Manski CF, Pepper J, Petrie C. Informing America's policy on illegal drugs: What we don't know keeps hurting us: National Academies Press; 2001.
37. Longo MC, Henry-Edwards SM, Humeniuk RE, Christie P, Ali RL. Impact of the heroin'drought'on patterns of drug use and drug-related harms. *Drug Alc Rev*. 2004; **23**(2): 143-50.
38. EMCDDA. Europol 2010 annual report on the implementation of council decision 2005/387/JHA. Lisbon: European Monitoring Centre for Drugs and Drug Addiction; 2010.

Werb et al. Effectiveness of enforcement-based supply reduction...

- 1
  - 2
  - 3
  - 4
  - 5
  - 6
  - 7
  - 8
  - 9
  - 10
  - 11
  - 12
  - 13
  - 14
  - 15
  - 16
  - 17
  - 18
  - 19
  - 20
  - 21
  - 22
  - 23
  - 24
  - 25
  - 26
  - 27
  - 28
  - 29
  - 30
  - 31
  - 32
  - 33
  - 34
  - 35
  - 36
  - 37
  - 38
  - 39
  - 40
  - 41
  - 42
  - 43
  - 44
  - 45
  - 46
  - 47
  - 48
  - 49
  - 50
  - 51
  - 52
  - 53
  - 54
  - 55
  - 56
  - 57
  - 58
  - 59
  - 60
39. Global Commission on Drug Policy. The War on Drugs and HIV/AIDS: How the criminalization of drug use fuels the global pandemic. Rio de Janeiro: Global Commission on Drug Policy; 2012.
40. Global Commission on Drug Policy. Report of the Global Commission on Drug Policy. Rio de Janeiro: Global Commission on Drug Policy; 2010.

For peer review only

Werb et al. Effectiveness of enforcement-based supply reduction...

**Table 1: Major Illegal Drug Data Surveillance Systems**

| Surveillance system                         | Country/Region | Inception Date | Illegal drugs considered |         |        | Outcomes considered |        |     |          | Summary of findings                                                                                                                |
|---------------------------------------------|----------------|----------------|--------------------------|---------|--------|---------------------|--------|-----|----------|------------------------------------------------------------------------------------------------------------------------------------|
|                                             |                |                | cannabis                 | cocaine | heroin | Price               | Purity | Use | Seizures |                                                                                                                                    |
| University of Mississippi Marijuana Project | USA            | 1975 -         | X                        |         |        |                     | X      |     |          | Cannabis potency increased between 1990 and 2009.                                                                                  |
| STRIDE Surveillance System                  | USA            | 1986-          | X                        | X       | X      | X                   | X      |     |          | Price decreased and purity/potency increased across all illegal drugs considered.                                                  |
| UNODC Drug Seizures Database                | International  | 1980 -         | X                        | X       | X      |                     |        |     | X        | Seizures of all drugs have increased between 1995 and 2006.                                                                        |
| UNODC Annual Reports Questionnaire          | International  | 1990 -         | X                        | X       | X      | X                   | X      | X   |          | Prices of opiates, cocaine, and cannabis have generally decreased in Europe and the US while purity and potency have increased.    |
| Reitox (EMCDDA database)                    | Europe         | 1993 -         | X                        | X       | X      | X                   |        |     | X        | Price of all illegal substances decreased in 2002 to 2007. Cocaine, cannabis, and heroin seizures increased between 2002 and 2007. |
| Illicit Drug Reporting System               | Australia      | 2000 -         | X                        | X       | X      | X                   | X      |     | X        | Between 2000 and 2010, the price of cocaine, cannabis and heroin decreased, while perceived purity remained stable.                |
| National Drug Threat Assessment             | USA            | 2001 -         | X                        | X       | X      | X                   |        |     | X        | Between 2005 and 2009, cocaine purity decreased whereas price increased.                                                           |

Note: STRIDE: System To Retrieve Information from Drug Evidence, EU = European Union, EC = European Commission; EMCDDA = European Monitoring Centre For Drugs and Drug Addiction; UNODC = United Nations Office of Drug Control

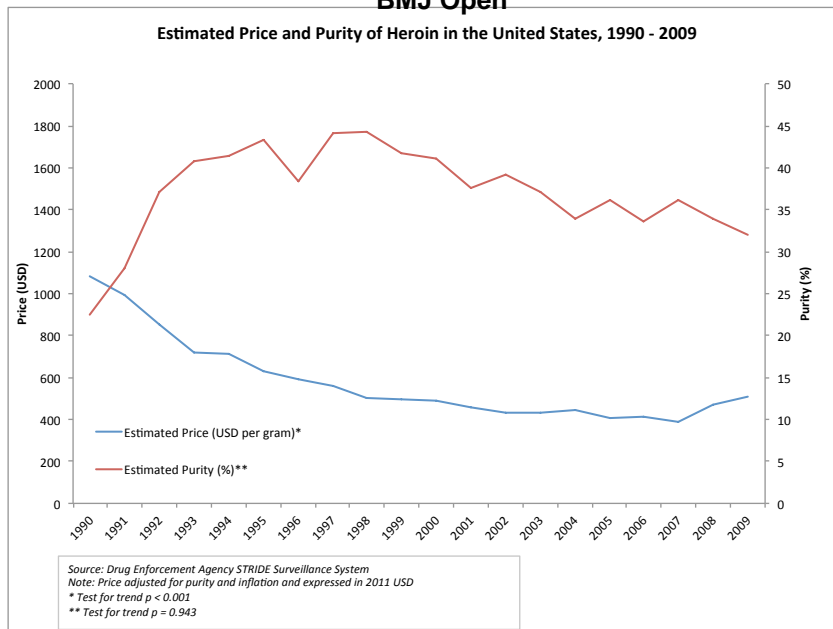

**Figure 1. Estimated Price and Purity of Heroin, Cocaine and Cannabis in the United States, 1990 – 2009**

For peer review only: <http://bmjopen.bmj.com/site/about/guidelines.xhtml>

1  
2  
3  
4  
5  
6  
7  
8  
9  
10  
11  
12  
13  
14  
15  
16  
17  
18  
19  
20  
21  
22  
23  
24  
25  
26  
27  
28  
29  
30  
31  
32  
33  
34  
35  
36  
37  
38  
39  
40  
41  
42  
43  
44  
45  
46  
47  
48  
49  
50  
51  
52  
53  
54  
55  
56  
57  
58  
59  
60

1  
2  
3  
4  
5  
6  
7  
8  
9  
10  
11  
12  
13  
14  
15  
16  
17  
18  
19  
20  
21  
22  
23  
24  
25  
26  
27  
28  
29  
30  
31  
32  
33  
34  
35  
36  
37  
38  
39  
40  
41  
42  
43  
44  
45  
46  
47  
48  
49  
50  
51  
52  
53  
54  
55  
56  
57  
58  
59  
60

**Figure 2. Average Inflation-Adjusted Price of Opiates and Cocaine in Europe, 1990 - 2007**

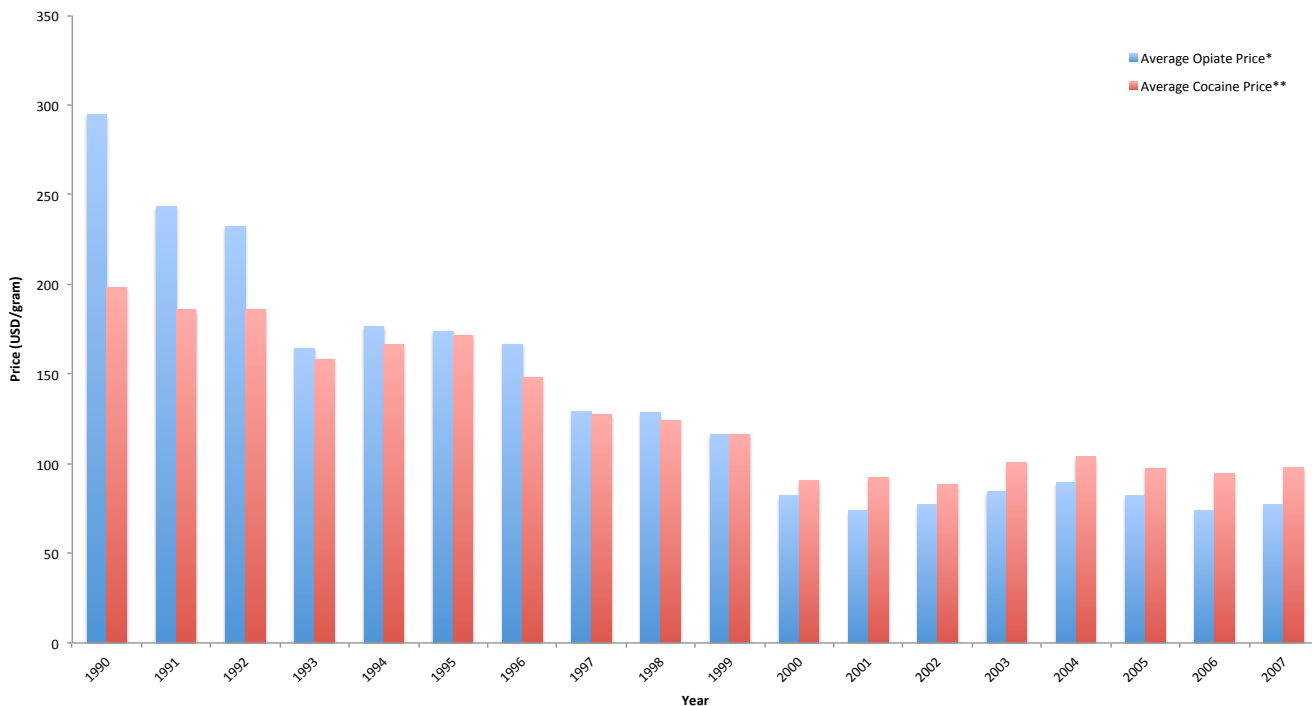

Source: United Nations Office on Drugs and Crime Annual Reports Questionnaire  
 Note: Price adjusted for CPI inflation  
 \* Test for trend:  $p < 0.001$   
 \*\* Test for trend:  $p < 0.001$

view only

1  
2  
3  
4  
5  
6  
7  
8  
9  
10  
11  
12  
13  
14  
15  
16  
17  
18  
19  
20  
21  
22  
23  
24  
25  
26  
27  
28  
29  
30  
31  
32  
33  
34  
35  
36  
37  
38  
39  
40  
41  
42  
43  
44  
45  
46  
47  
48  
49  
50  
51  
52  
53  
54  
55  
56  
57  
58  
59  
60



Review only

Figure 4. Cocaine, Cannabis and Heroin Seizures in Europe\*, 1990 - 2010

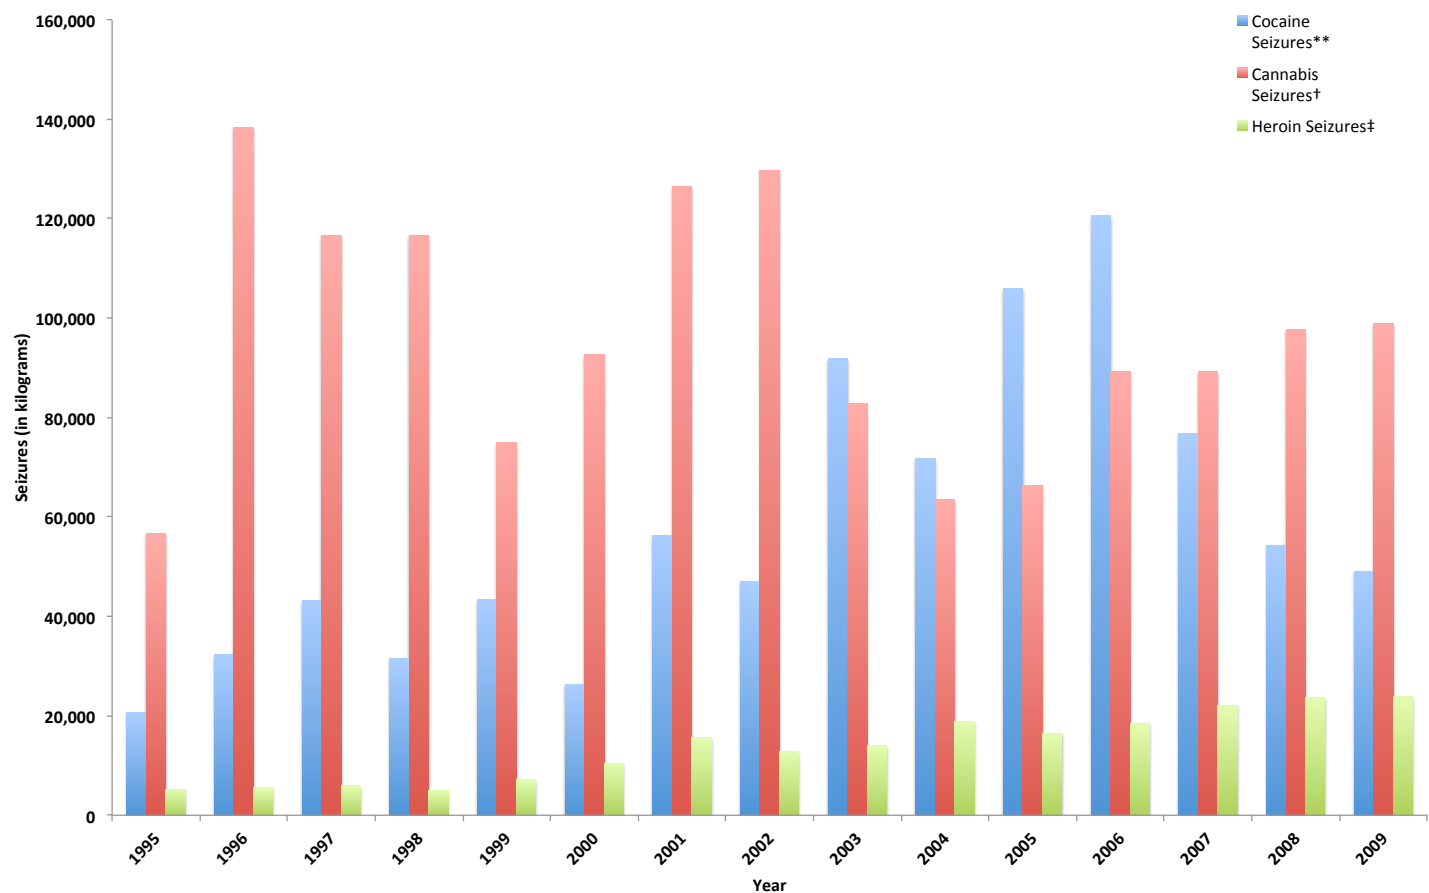

Source: European Monitoring Centre for Drugs and Drug Addiction REITOX Network  
 \* Refers to European Union member countries, Croatia, Norway, and Turkey  
 \*\* Test for trend:  $p = 0.018$   
 † Test for trend:  $p = 0.446$   
 ‡ Test for trend:  $p < 0.001$

only



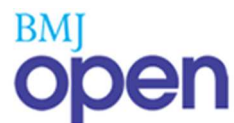

**The temporal relationship between drug supply indicators:  
An audit of international government surveillance systems**

|                                 |                                                                                                                                                                                                                                                                                                                                                                                                                        |
|---------------------------------|------------------------------------------------------------------------------------------------------------------------------------------------------------------------------------------------------------------------------------------------------------------------------------------------------------------------------------------------------------------------------------------------------------------------|
| Journal:                        | <i>BMJ Open</i>                                                                                                                                                                                                                                                                                                                                                                                                        |
| Manuscript ID:                  | bmjopen-2013-003077.R2                                                                                                                                                                                                                                                                                                                                                                                                 |
| Article Type:                   | Research                                                                                                                                                                                                                                                                                                                                                                                                               |
| Date Submitted by the Author:   | 16-Jul-2013                                                                                                                                                                                                                                                                                                                                                                                                            |
| Complete List of Authors:       | Werb, Dan; BC Centre for Excellence in HIV/AIDS, Urban Health Research Initiative<br>Kerr, Thomas; BC Centre for Excellence in HIV/AIDS, Urban Health Research Initiative<br>Nosyk, Bohdan; BC Centre for Excellence in HIV/AIDS,<br>Strathdee, Steffanie; University of California San Diego, Medicine<br>Montaner, Julio; BC Centre for Excellence in HIV/AIDS,<br>Wood, Evan; BC Centre for Excellence in HIV/AIDS, |
| <b>Primary Subject Heading</b>: | Public health                                                                                                                                                                                                                                                                                                                                                                                                          |
| Secondary Subject Heading:      | Health policy, Public health                                                                                                                                                                                                                                                                                                                                                                                           |
| Keywords:                       | AUDIT, Public health < INFECTIOUS DISEASES, PUBLIC HEALTH                                                                                                                                                                                                                                                                                                                                                              |
|                                 |                                                                                                                                                                                                                                                                                                                                                                                                                        |

SCHOLARONE™  
Manuscripts

Werb et al. Effectiveness of enforcement-based supply reduction...

# The temporal relationship between drug supply indicators: An audit of international government surveillance systems

Dan Werb; Thomas Kerr; Bohdan Nosyk; Steffanie Strathdee; Julio Montaner; Evan Wood

**Dan Werb**, Senior Research Assistant, Urban Health Research Initiative, BC Centre for Excellence in HIV/AIDS, Vancouver, Canada, 608 – 1081 Burrard Street, Vancouver, B.C., Canada, V6Z 1Y6

**Thomas Kerr**, Director, Urban Health Research Initiative, BC Centre for Excellence in HIV/AIDS, Vancouver, Canada, 608 – 1081 Burrard Street, Vancouver, B.C., Canada, V6Z 1Y6

**Bohdan Nosyk**, Research Scientist, BC Centre for Excellence in HIV/AIDS, Vancouver, Canada, 608 – 1081 Burrard Street, Vancouver, B.C., Canada, V6Z 1Y6

**Steffanie Strathdee**, Associate Dean of Global Health Sciences, University of California San Diego, Institute of the Americas, 10111 N. Torrey Rd., La Jolla, CA, USA, 92093-0507

**Julio Montaner**, Director, BC Centre for Excellence in HIV/AIDS, Vancouver, Canada, 608 – 1081 Burrard Street, Vancouver, B.C., Canada, V6Z 1Y6

**Evan Wood**, Director, Urban Health Research Initiative, BC Centre for Excellence in HIV/AIDS, Vancouver, Canada, 608 – 1081 Burrard Street, Vancouver, B.C., Canada, V6Z 1Y6

**Send correspondence to:** Evan Wood, MD, PhD ABIM FRCPC  
Professor of Medicine, University of British Columbia  
BC Centre for Excellence in HIV/AIDS  
608-1081 Burrard Street, Vancouver, B.C. V6Z 1Y6  
CANADA  
**Tel:** (604) 806-9116  
**Fax:** (604) 806-9044  
**Email:** uhri-ew@cfenet.ubc.ca

**Word Count:** 2,575

**Tables:** 1

**Figures:** 4

Werb et al. Effectiveness of enforcement-based supply reduction...

**Revised:** July 17, 2013

**Printed:** July 17, 2013

For peer review only

1  
2  
3  
4  
5  
6  
7  
8  
9  
10  
11  
12  
13  
14  
15  
16  
17  
18  
19  
20  
21  
22  
23  
24  
25  
26  
27  
28  
29  
30  
31  
32  
33  
34  
35  
36  
37  
38  
39  
40  
41  
42  
43  
44  
45  
46  
47  
48  
49  
50  
51  
52  
53  
54  
55  
56  
57  
58  
59  
60

**ABSTRACT**

**Objectives:** Illegal drug use continues to be a major threat to community health and safety. We used international drug surveillance databases to assess the relationship between multiple long-term estimates of illegal drug price and purity.

**Design:** We systematically searched for longitudinal measures of illegal drug supply indicators to assess the long-term impact of enforcement-based supply reduction interventions.

**Setting:** Data from identified illegal drug surveillance systems were analysed using an *a priori* defined protocol in which we sought to present annual estimates beginning in 1990. Data were then subjected to trend analyses.

**Main Outcome Measures:** Data were obtained from government surveillance systems assessing price, purity, and/or seizure quantities of illegal drugs; systems with at least 10 years of longitudinal data assessing price, purity/potency, or seizures were included.

**Results:** We identified 7 regional/international meta-surveillance systems with longitudinal measures of price or purity/potency that met eligibility criteria. In the United States, the average inflation- and purity-adjusted prices of heroin, cocaine, and cannabis decreased by 81%, 80% and 86% respectively between 1990 and 2007, whereas average purity increased by 60%, 11%, and 161% respectively. Similar trends were observed in Europe, where during the same period the average inflation-adjusted price of opiates and cocaine decreased by 74% and 51% respectively. In Australia, the average inflation-adjusted price of cocaine decreased 14%, while the inflation-adjusted price of heroin and cannabis both decreased 49% between 2000 and 2010. During this time, seizures of these drugs in major production regions and major domestic markets generally increased.

**Conclusions:** With few exceptions and despite increasing investments in enforcement-based supply reduction efforts aimed at disrupting global drug supply, illegal drug prices have generally decreased while drug purity has generally increased since 1990. These findings suggest that expanding efforts at controlling the global illegal drug market through law enforcement are failing.

Word count: 298

1  
2  
3  
4  
5  
6  
7  
8  
9  
10  
11  
12  
13  
14  
15  
16  
17  
18  
19  
20  
21  
22  
23  
24  
25  
26  
27  
28  
29  
30  
31  
32  
33  
34  
35  
36  
37  
38  
39  
40  
41  
42  
43  
44  
45  
46  
47  
48  
49  
50  
51  
52  
53  
54  
55  
56  
57  
58  
59  
60

Werb et al. Effectiveness of enforcement-based supply reduction...

## Article Summary

### Article focus

- Studies have demonstrated that illegal drug use remains a threat to community health and safety.
- However, less is known regarding the long-term impact of efforts to reduce the overall supply of illegal drugs.

### Key messages

- Using longitudinal governmental surveillance data, this study demonstrates that over the past two decades, the supply of major illegal drugs has increased, as measured through a general decline in the price, and a general increase in the purity of illegal drugs in a variety of settings.

### Strengths and limitations

- This study was limited by the quality and consistency of surveillance data on illegal drug supply
- This study presents data on trends in illegal drug supply in a variety of settings over two decades, including consumer and export drug markets

Werb et al. Effectiveness of enforcement-based supply reduction...

## OBJECTIVES

The United Nations (UN) recently estimated that the global illegal drug trade is worth at least \$350 billion USD annually,<sup>1</sup> and illegal drug use remains a major threat to community health and safety.<sup>2, 3</sup> In addition to the range of harms associated with the direct health effects of drugs, including fatal overdose,<sup>4, 5</sup> illegal drug use is also one of the key global drivers of blood borne disease transmission, in particular human immunodeficiency virus (HIV) infection.<sup>6, 7</sup> Illegal drug markets also contribute to community concerns such as high rates of violence in settings where the trade proliferates.<sup>8</sup>

In response to the health and social concerns associated with illegal drug use, several UN conventions were created to control the possession, consumption, and manufacture of illegal drugs.<sup>9-11</sup> As a result, over the last several decades, most national drug control strategies have prioritized drug law enforcement interventions to reduce drug supply, despite recent calls by experts to explore alternative models of drug control such as systems of drug decriminalization and legal regulation.<sup>12-14</sup> Some unintended consequences of this approach, such as record incarceration rates, have been well-documented.<sup>15-18</sup> Additionally, a small number of studies assessing aspects of drug supply, measured through indicators of drug price, purity/potency and seizures, have been undertaken to describe the global relationship between these indicators over the long-term.<sup>19</sup> However, systematic evaluation of these relationships is still needed to elucidate patterns of drug supply. The present study therefore sought to systematically identify international data from publicly available illegal drug surveillance systems to assess long-term estimates of illegal drug supply.

1  
2  
3  
4  
5  
6  
7  
8  
9  
10  
11  
12  
13  
14  
15  
16  
17  
18  
19  
20  
21  
22  
23  
24  
25  
26  
27  
28  
29  
30  
31  
32  
33  
34  
35  
36  
37  
38  
39  
40  
41  
42  
43  
44  
45  
46  
47  
48  
49  
50  
51  
52  
53  
54  
55  
56  
57  
58  
59  
60

Werb et al. Effectiveness of enforcement-based supply reduction...

## DESIGN

### ***Outcomes of interest***

The primary outcomes of interest were long-term patterns of illegal drug supply, measured through indicators of price and purity/potency for three major illegal drugs: cannabis, cocaine, and opiates (e.g., opium and heroin). While data on amphetamine-type stimulants exist in some specific countries (e.g., the United Kingdom), this class of drugs was not included given inconsistent data collection and classification, and fluctuating surveillance periods and overall data quality. A secondary outcome of interest was data on illegal drug seizures in a) major illegal drug source regions and, b) major destination markets, as identified by the United Nations Office on Drugs and Crime (UNODC).<sup>20</sup> These secondary outcome data were used as an additional proxy measure to assess the availability of illegal drugs in specific regions, as has been done previously.<sup>21, 22</sup> All outcomes were systematically identified through publicly available illegal drug surveillance systems. Linear by linear association trend tests were carried out on **annual** estimates of all outcomes of interest. Price and purity estimates represent median values for each year, while estimates for seizures represent crude totals of quantity seized. All price estimates are expressed in 2011 USD and are, where possible, adjusted for purity.<sup>23</sup>

### ***Illegal drug surveillance systems***

An online search of surveillance systems monitoring illegal drugs using two *a priori* defined inclusion criteria was carried out. Search terms included: drugs, illicit, illegal, price, purity, potency, surveillance system, government data, longitudinal, annual, estimate. Inclusion/exclusion criteria were as follows: only

Werb et al. Effectiveness of enforcement-based supply reduction...

1  
2 surveillance systems that included continuous longitudinal assessments of these  
3  
4 outcomes of interest for at least 10 years were included because we specifically  
5  
6 sought to assess the long-term impact of enforcement-based supply reduction  
7  
8 strategies on illegal drug price and purity/potency. Finally, data extraction was  
9  
10 restricted to 1990 and onwards to focus on patterns of supply during recent  
11  
12 decades.  
13  
14

15  
16 Data were obtained through online searches of registries of surveillance  
17  
18 systems (e.g., governmental websites, United Nations databases), governmental  
19  
20 reports, and peer-reviewed publications, through referrals from experts in the  
21  
22 field, and through data requests to relevant organizations including the UNODC.  
23  
24 All authors had complete access to all data and all had final responsibility to  
25  
26 submit for publication. Ethics approval was not required given that we relied  
27  
28 exclusively on publicly available data.  
29  
30  
31

## 32 33 RESULTS

34  
35 We identified 7 government surveillance systems that met inclusion  
36  
37 criteria. Of these, 3 (43%) reported on international data, 3 (43%) reported on  
38  
39 data from the United States (US), and 1 (14%) reported on data from Australia.  
40  
41 One of the longest-running surveillance system identified, the US-based  
42  
43 Marijuana Potency Monitoring Project, is funded by the U.S. National Institutes of  
44  
45 Health and was established in 1975, while the most recent surveillance system  
46  
47 was established in 2001 (e.g., the US-based *National Drug Threat Assessment*).  
48  
49 With respect to international surveillance systems, the UNODC administers two  
50  
51 separate surveillance systems that collect data from all participating United  
52  
53 Nations member states: the Annual Reports Questionnaire surveillance system  
54  
55  
56  
57  
58  
59  
60



1  
2  
3  
4  
5  
6  
7  
8  
9  
10  
11  
12  
13  
14  
15  
16  
17  
18  
19  
20  
21  
22  
23  
24  
25  
26  
27  
28  
29  
30  
31  
32  
33  
34  
35  
36  
37  
38  
39  
40  
41  
42  
43  
44  
45  
46  
47  
48  
49  
50  
51  
52  
53  
54  
55  
56  
57  
58  
59  
60

Werb et al. Effectiveness of enforcement-based supply reduction...

that collects price and purity/potency data, and the Drug Seizures Database that collects seizure data. Finally, the European Monitoring Centre for Drugs and Drug Addiction administers the Reitox drug surveillance system network, which aggregates data from a number of country-level surveillance systems in Europe, as described below.<sup>24</sup>

### **Price and Purity/Potency**

Table 1 presents surveillance systems that matched search criteria. An assessment of data provided by these surveillance systems demonstrated a number of broad trends. First, purity and/or potency of illegal drugs generally remained stable or increased overall during the study period. Second, the price of illegal drugs, with few exceptions, generally decreased. Third, seizures of cannabis, cocaine and opiates generally increased in major drug production regions and major domestic markets.

Figure 1 presents data from the US Drug Enforcement Administration's System To Retrieve Information from Drug Evidence (STRIDE). As can be seen, between 1990 and 2007 (the last year for which data are publicly available), the purity of heroin and cocaine, and the potency of cannabis herb in the US increased, while the inflation- and purity-adjusted retail street prices of these three drugs declined.<sup>25</sup> Specifically, heroin purity increased by 60% ( $p = 0.568$ ), cocaine purity increased by 11% ( $p = 0.181$ ), and cannabis herb potency increased by 161% ( $p < 0.001$ ) during this time. During the same period, the prices of heroin, cocaine, and cannabis decreased 81% ( $p < 0.001$ ), 80% ( $p < 0.001$ ), and 86% ( $p < 0.001$ ) respectively.

Werb et al. Effectiveness of enforcement-based supply reduction...

1  
2  
3  
4  
5  
6  
7  
8  
9  
10  
11  
12  
13  
14  
15  
16  
17  
18  
19  
20  
21  
22  
23  
24  
25  
26  
27  
28  
29  
30  
31  
32  
33  
34  
35  
36  
37  
38  
39  
40  
41  
42  
43  
44  
45  
46  
47  
48  
49  
50  
51  
52  
53  
54  
55  
56  
57  
58  
59  
60

Figure 2 presents data collected by the UNODC on the street price of cocaine and opiates in participating European countries (i.e., Austria, Belgium, Denmark, Finland, France, Germany, Greece, Italy, Luxembourg, Netherlands, Norway, Iceland, Portugal, Spain, Sweden, Switzerland, United Kingdom, and Ireland).<sup>26</sup> In these countries, between 1990 and 2009, the aggregate average retail street price of cocaine decreased by 51%, from \$198 USD per gram to \$98 USD per gram ( $p < 0.001$ ). Similarly, the aggregate average price of opiates in Europe decreased 74%, from a high of \$295 USD per gram in 1990 to \$77 USD per gram in 2009 ( $p < 0.001$ ).

Data from the Australian Illicit Drug Reporting System (IDRS) were available from 2000 to 2010. IDRS data suggest that the price of illegal drugs in Australia fluctuated substantially during this period. Specifically, after adjustment, the price of heroin decreased by 49%, from approximately \$460 USD per gram to approximately \$235 per gram ( $p < 0.001$ ), despite the well-described heroin 'drought' of 2001,<sup>27</sup> which saw a reduction in the supply and availability of heroin in Australia. Additionally, the price of cocaine decreased 14% from approximately \$255 AUD per gram to \$220 AUD per gram ( $p = 0.477$ ), and the price of cannabis decreased 49% from approximately \$25 AUD per gram to \$13 AUD per gram ( $p < 0.001$ ).<sup>28</sup>

## Seizures

### Domestic Markets

Figure 3 presents data on cannabis and cocaine seizures in the US between 1990 and 2010. As shown, data from the US Drug Enforcement Administration's STRIDE surveillance system demonstrate that the amount of

1  
2  
3  
4  
5  
6  
7  
8  
9  
10  
11  
12  
13  
14  
15  
16  
17  
18  
19  
20  
21  
22  
23  
24  
25  
26  
27  
28  
29  
30  
31  
32  
33  
34  
35  
36  
37  
38  
39  
40  
41  
42  
43  
44  
45  
46  
47  
48  
49  
50  
51  
52  
53  
54  
55  
56  
57  
58  
59  
60

*Werb et al. Effectiveness of enforcement-based supply reduction...*

cannabis herb seized by the Drug Enforcement Administration both in, and destined for, the US rose 465%, from approximately 130,000 kilograms in 1990 to approximately 720,000 kilograms in 2010 ( $p < 0.001$ ). During this same period, despite fluctuations, the amount of cocaine seized by the US Drug Enforcement Administration decreased 49%, from approximately 57,000 kilograms in 1990 to 29,000 in 2010 ( $p = 0.409$ ), while the amount of heroin seized increased 29% from approximately 535 kilograms in 1990 to 690 kilograms ( $p = 0.979$ , heroin seizure data not shown).<sup>29</sup>

Figure 4 presents data on cannabis, cocaine and heroin seizures in countries participating in the European Monitoring Centre for Drugs and Drug Addiction's Reitox surveillance network (i.e., European Union member countries, as well as Croatia, Norway, and Turkey), between 1995 and 2009. As can be seen, annual estimates of the quantity of both cocaine and cannabis herb seized fluctuated throughout this period; however, the quantity of heroin seized increased relatively steadily. Specifically, the number of kilograms of cannabis herb seized was at a low of approximately 57,000 kilograms in 1995, and peaked one year later in 1996 at approximately 138,000 kilograms ( $p = 0.446$ ). The number of cocaine seizures was at a low of approximately 21,000 kilograms in 1995, and peaked at approximately 121,000 kilograms in 2006 ( $p = 0.018$ ). Finally, the number of kilograms of heroin seized increased 380% from a low of approximately 5,000 in 1995 to a high of approximately 24,000 in 2009 ( $p < 0.001$ ).

### *Production Regions*

Werb et al. Effectiveness of enforcement-based supply reduction...

1  
2  
3 With respect to opiate seizures, the Golden Triangle includes parts of  
4 Thailand, Lao, Viet Nam and Myanmar, and according to the UNODC, this region  
5 is the second largest supplier of heroin globally, though production has declined  
6 throughout the last decade, with opium production decreasing by approximately  
7 60% and 90% in Myanmar and Lao, respectively.<sup>30</sup> In this region, trends in  
8 seizures of opium have fluctuated; 3,198 kilograms of opium were seized in  
9 1990, with a high of 12,462 kilograms seized in 2007 before a steep decline to  
10 1,225 kilograms in 2010 ( $p = 0.856$ ). Similarly, seizures of heroin fluctuated, with  
11 a decrease of more than half, from 1,337 kilograms in 1990, to 627 kilograms in  
12 2010 ( $p = 0.085$ ), and a peak of 1,565 kilograms seized in 2009. In Afghanistan,  
13 which is believed to supply over 90% of the world's opium,<sup>30</sup> seizures of raw and  
14 prepared opium increased by over 12,000%, from 453 kilograms in 1990 to  
15 57,023 kilograms in 2010, and seizures of heroin increased by over 600%, from  
16 1,256 kilograms in 1990 to 9,036 kilograms in 2010 (Note: missing data  
17 prevented a trend test for annual opium and heroin seizures in Afghanistan).  
18  
19  
20  
21  
22  
23  
24  
25  
26  
27  
28  
29  
30  
31  
32  
33  
34  
35  
36

37  
38 With respect to cocaine seizures, according to the UNODC, Latin  
39 America's Andean region, which includes Peru, Bolivia, and Colombia, is the  
40 primary global supplier of this drug, as coca leaf is grown exclusively in this  
41 region.<sup>31</sup> While seizures of cocaine in the Andean region decreased 81%, from  
42 97,437 kilograms in 1990 to 17,835 kilograms in 2007 ( $p = 0.028$ ), seizures of  
43 coca leaf increased 188% from 601,038 kilograms in 1990 to 1.73 million  
44 kilograms in 2007 ( $p = 0.004$ ). During the same period, the area of coca  
45 cultivation in this region declined slightly, from approximately 210,000 hectares to  
46 180,000 hectares ( $p = 0.004$ ).  
47  
48  
49  
50  
51  
52  
53  
54  
55  
56  
57  
58  
59  
60

1  
2  
3  
4  
5  
6  
7  
8  
9  
10  
11  
12  
13  
14  
15  
16  
17  
18  
19  
20  
21  
22  
23  
24  
25  
26  
27  
28  
29  
30  
31  
32  
33  
34  
35  
36  
37  
38  
39  
40  
41  
42  
43  
44  
45  
46  
47  
48  
49  
50  
51  
52  
53  
54  
55  
56  
57  
58  
59  
60

*Werb et al. Effectiveness of enforcement-based supply reduction...*

Finally, according to the UNODC, major areas of cannabis cultivation exist in North Africa, Afghanistan, and North America. These areas are net exporters of cannabis, though most cannabis-producing countries also produce the drug for internal consumption.<sup>20</sup> In North Africa (i.e., Algeria, Morocco, and Tunisia), seizures of cannabis herb increased by 208% from 67,930 kilograms in 1990 to 209,445 kilograms in 2007 ( $p = 0.015$ ). In North America (i.e., Canada, the United States, and Mexico), seizures of cannabis herb increased by 288% from 782,607 kilograms in 1990 to 3.05 million kilograms in 2007 ( $p < 0.001$ ). In Afghanistan, while data on cannabis herb seizures are not available, seizures of cannabis resin increased 630% from 5,068 kilograms in 1990 to 36,972 kilograms in 2006 ( $p = 0.061$ ).

## CONCLUSIONS

Longitudinal data from government surveillance systems demonstrate that over the past two decades there has been a general pattern of increased illegal drug supply as defined through lower price and higher purity of heroin, cocaine and cannabis. During the same period, patterns of drug seizures either increased or remained stable, though the trends detected in some of these indicators did not reach statistical significance. As such, we conclude, consistent with previous studies,<sup>19</sup> that the global supply of illicit drugs has likely not been reduced in the previous two decades. In particular, the data presented in this study suggest that the supply of opiates and cannabis, in particular, have increased, given the increasing potency and decreasing prices of these illegal commodities. These results have implications for the development of evidence-based drug policies,

*Werb et al. Effectiveness of enforcement-based supply reduction...*

1  
2 particularly given the interest in novel drug policy approaches in a number of  
3  
4 settings in Latin America, North America, and Europe.<sup>32-34</sup>  
5  
6

7 As noted elsewhere,<sup>35, 36</sup> there are limitations of ecologic analyses based  
8  
9 on international surveillance systems. First, some states collect little or no data  
10  
11 on indicators of illegal drug supply, whereas other states spend significant energy  
12  
13 on monitoring drug availability. Second, even in states that closely track  
14  
15 indicators of supply, the degree to which seized samples of illegal drugs reflect  
16  
17 purity of retail drugs sold on the street is subject to variation, though where  
18  
19 possible we presented purity-adjusted prices to address this limitation.<sup>23</sup>  
20  
21 Nevertheless, the long-term trends in increasing purity and decreasing price  
22  
23 presented here likely reflect overall trends in many regions, though it should be  
24  
25 noted that in some regions (e.g., Europe), indicators of price and purity may have  
26  
27 been strongly influenced by a few countries such as the United Kingdom and  
28  
29 Spain. Additionally, some exceptions in the trends were observed. Australia for  
30  
31 instance, while experiencing a significant decrease in the prices of both heroin  
32  
33 and cannabis, did not experience a significant decrease in the price of cocaine,  
34  
35 which may reflect the geographic isolation of the region or other market factors. It  
36  
37 is also of note that Australia's 'heroin drought',<sup>37</sup> which saw a sudden drop in  
38  
39 measures of the supply and availability of heroin, appears to have had a limited  
40  
41 long-term impact on supply, though some experts suggest that it may have  
42  
43 resulted in higher levels of polysubstance use among Australian heroin  
44  
45 injectors.<sup>27</sup> Third, limitations in longitudinal data collection precluded our ability to  
46  
47 include amphetamine-type stimulants and other emerging synthetic substances,  
48  
49 as this data is limited to certain countries and the focus of this study was on  
50  
51  
52  
53  
54  
55  
56  
57  
58  
59  
60

1  
2  
3  
4  
5  
6  
7  
8  
9  
10  
11  
12  
13  
14  
15  
16  
17  
18  
19  
20  
21  
22  
23  
24  
25  
26  
27  
28  
29  
30  
31  
32  
33  
34  
35  
36  
37  
38  
39  
40  
41  
42  
43  
44  
45  
46  
47  
48  
49  
50  
51  
52  
53  
54  
55  
56  
57  
58  
59  
60

*Werb et al. Effectiveness of enforcement-based supply reduction...*

regional trends. It is noteworthy in this regard that the production of synthetic substances – as well as indoor cannabis cultivation – present particular challenges for supply reduction strategies, given that these drugs can be mass produced in clandestine locations regardless of climate or other factors that limit traditional drug production.<sup>20, 38</sup> Finally, while this review focused on patterns of price and purity of selected illegal drugs, these measures are only a marker of drug supply, and do not measure other factors determining availability and concomitant rates of drug use. These limitations to assessing global drug supply using classic proxy measures such as price, purity, and, to a lesser extent, seizures, suggests that there may be a need to expand the range of measures systematically collected by governments and international bodies such as the UNODC and the European Monitoring Centre for Drugs and Drug Addiction. In particular, meaningfully incorporating measures derived from street-level questionnaires of people who use drugs may provide a more reliable metric of supply and availability. Indeed, some bodies, such as Australia's IDRS, collect such data,<sup>28</sup> and this methodological approach should be considered by those coordinating surveillance of illegal drugs. Other bodies have also prioritized emphasizing measures of community health including reduced HIV infections, reduced drug-related violence and reductions in numbers of individuals incarcerated.<sup>39, 40</sup>

In summary, longitudinal illegal drug surveillance systems demonstrate a general global pattern of falling drug prices and increasing drug purity and potency, alongside a relatively consistent pattern of increasing seizures of illegal drugs. Although source data have limitations and there are some exceptions to

1 *Werb et al. Effectiveness of enforcement-based supply reduction...*

2 these trends, these findings should be useful given the current debates and drug  
3 policy experimentation under way in Latin America, North America, and  
4 Europe.<sup>32-34</sup> It is hoped that this study highlights the need to re-examine the  
5 effectiveness of national and international drug strategies that place a  
6 disproportionate emphasis on supply reduction at the expense of evidence-based  
7 prevention and treatment of problematic illegal drug use.  
8  
9  
10  
11  
12  
13  
14  
15  
16  
17  
18  
19  
20  
21  
22  
23  
24  
25  
26  
27  
28  
29  
30  
31  
32  
33  
34  
35  
36  
37  
38  
39  
40  
41  
42  
43  
44  
45  
46  
47  
48  
49  
50  
51  
52  
53  
54  
55  
56  
57  
58  
59  
60



1  
2  
3  
4  
5  
6  
7  
8  
9  
10  
11  
12  
13  
14  
15  
16  
17  
18  
19  
20  
21  
22  
23  
24  
25  
26  
27  
28  
29  
30  
31  
32  
33  
34  
35  
36  
37  
38  
39  
40  
41  
42  
43  
44  
45  
46  
47  
48  
49  
50  
51  
52  
53  
54  
55  
56  
57  
58  
59  
60

*Werb et al. Effectiveness of enforcement-based supply reduction...*

### **Acknowledgments:**

The authors would like to thank Deborah Graham, Peter Vann, Katherine Quayle, Samantha MacLean, and Kevin Lutz for their administrative assistance. Dan Werb is supported by the Canadian Institutes of Health Research. Thomas Kerr is supported by the Canadian Institutes of Health Research and the Michael Smith Foundation for Health Research.

### **Competing interests:**

All authors declare that (1) DW, TK, BN, JM and EW have support from the BC Centre for Excellence in HIV/AIDS for their submitted work; SS has support from the Division of Global Public Health, Department of Medicine, University of California, San Diego; (2) DW, TK, BN, SS, and EW have no relationships with companies that might have an interest in the submitted work in the previous 3 years; (3) their spouses, partners, or children have no financial relationships that may be relevant to the submitted work; and (4) DW, TK, BN, SS and EW have no non-financial interests that may be relevant to the submitted work. JM has received grants from, served as an ad hoc adviser to, or spoken at events sponsored by Abbott, Argos Therapeutics, Bioject Inc., Boehringer Ingelheim, BMS, Gilead Sciences, GlaxoSmithKline, Hoffmann-La Roche, Janssen-Ortho, Merck Frosst, Panacos, Pfizer Ltd., Schering, Serono Inc., TheraTechnologies, Tibotec (J&J), and Trimeris.

Werb et al. Effectiveness of enforcement-based supply reduction...

## Contributorship

All authors contributed substantially to the design and drafting of the manuscript. DW and EW designed the initial methodological approach and drafted the manuscript; TK, BN, SS, and JM provided substantial revisions to the manuscript.

## Data sharing

This study employed publicly available data, as described in the methods section.

## Funding

None

## References:

1. Pietschmann T, Walker J. Estimating illicit financial flows resulting from drug trafficking and other transnational organized crimes. Vienna: UNODC Studies and Threat Analysis Section, Division for Policy Analysis and Public Affairs; 2011.
2. Jurgens R, Ball A, Verster A. Interventions to reduce HIV transmission related to injecting drug use in prison. *Lancet Infect Dis.* 2009; **9**(1): 57-66.
3. Beyrer C, Malinowska-Sempruch K, Kamarulzaman A, Kazatchkine M, Sidibe M, Strathdee SA. Time to act: A call for comprehensive responses to HIV in people who use drugs. *The Lancet.* 2010; **376**(9740): 551-63.
4. Coffin PO, Galea S, Ahern J, Leon AC, Vlahov D, Tardiff K. Opiates, cocaine, and alcohol combinations in accidental drug overdose deaths in New York City, 1990-98. *Addiction.* 2003; **98**(6): 739.
5. Garfield J, Drucker E. Fatal overdose trends in major US cities: 1990 - 1997. *Addictions Research and Theory.* 2001; **9**(5): 425.
6. Mathers BM, Degenhardt L, Phillips B, Wiessing L, Hickman M, Strathdee SA, et al. Global epidemiology of injecting drug use and HIV among people who inject drugs: A systematic review. *Lancet.* 2008; **372**(9651): 1733-45.
7. Shepard CW, Finelli L, Alter MJ. Global epidemiology of hepatitis C virus infection. *Lancet Infect Dis.* 2005; **5**(9): 558-67.
8. Werb D, Rowell G, Guyatt G, Kerr T, Montaner J, Wood E. Effect of drug law enforcement on drug market violence: A systematic review. *Int J Drug Pol.* 2011; **22**(2): 8.

1  
2  
3  
4  
5  
6  
7  
8  
9  
10  
11  
12  
13  
14  
15  
16  
17  
18  
19  
20  
21  
22  
23  
24  
25  
26  
27  
28  
29  
30  
31  
32  
33  
34  
35  
36  
37  
38  
39  
40  
41  
42  
43  
44  
45  
46  
47  
48  
49  
50  
51  
52  
53  
54  
55  
56  
57  
58  
59  
60

Werb et al. Effectiveness of enforcement-based supply reduction...

9. ECOSOC. Convention on Psychotropic Substances, 1971. Vienna: United Nations Economic and Social Council; 1971.
10. ECOSOC. The Single Convention on Narcotic Drugs, 1961. As amended by the 1972 Protocol amending the Single Convention on Narcotic Drugs, 1961. Vienna: United Nations Economic and Social Council; 1972.
11. ECOSOC. United Nations Convention Against Illicit Traffic in Narcotic Drugs and Psychotropic Substances, 1988. Vienna: United Nations Economic and Social Council; 1988.
12. Travis A. Home Office rejects decriminalising possession of drugs for personal use. *The Guardian*. 2011 October 14.
13. Hoeffel J. Federal crackdown on medical pot sales reflects a shift in policy. *Los Angeles Times*. 2011 October 7.
14. Greenwald G. Drug decriminalization in Portugal: Lessons for creating fair and successful drug policies. Washington, D.C.: Cato Institute; 2009.
15. Warren J, Gelb A, Horowitz J, Riordan J. One in 100: Behind bars in America 2008. Washington, D.C.: The Pew Center on the States; 2008.
16. Farrell G, Clark, K. What does the world spend on criminal justice? Helsinki: The European Institute for Criminal Prevention and Control, affiliated with the United Nations; 2004.
17. Walmsley R. World prison population list. Report. London: International Centre for Prison Studies; 2007.
18. UNODC. World Drug Report 2008. Vienna: United Nations Office on Drugs and Crime; 2008.
19. A report on global illicit drug markets, 1998-2007. Netherlands: European Commission Directorate-General on Justice, Freedom and Security; 2009.
20. UNODC. World Drug Report 2011. Vienna: United Nations Office on Drugs and Crime; 2011.
21. Roberts M, Bewley-Taylor DR, Trace M. Monitoring drug policy outcomes: the measurement of drug-related harm: Beckley Foundation Drug Policy Programme; 2006.

Werb et al. Effectiveness of enforcement-based supply reduction...

22. Lenke L. An analysis of the significance of supply and market factors for variations in European cannabis use. EMCDDA Monographs. 2008: 293.
23. Caulkins JP. Price and purity analysis for illicit drug: Data and conceptual issues. Drug Alc Depend. 2007; **90**: S61-S8.
24. Hartnoll R. Drug epidemiology in the European institutions: Historical background and key indicators. Bulletin on Narcotics. 2003; **55**(1): 53-72.
25. Fries A, Anthony RW, Cseko Jr. A, Gaither CC, Schulman E. The price and purity of illicit drugs: 1981 - 2007. Alexandria, VA: Institute for Defense Analyses; 2008.
26. UNODC. World Drug Report 2010: Statistical Annex. Vienna: United Nations Office on Drugs and Crime; 2010.
27. Weatherburn D, Jones C, Freeman K, Makkai T. Supply control and harm reduction: lessons from the Australian heroin drought. Addiction. 2003; **98**: 83.
28. Stafford J, Burns L. Australian drug trends 2010: Findings from the Illicit Drug Reporting System (IDRS). Sydney: National Drug and Alcohol Research Centre; 2011.
29. DEA. STRIDE surveillance system. New York: United States Drug Enforcement Administration; 2011.
30. UNODC. World Drug Report 2010. Vienna: United Nations Office on Drugs and Crime; 2010.
31. ONDCP. Coca in the Andes. Washington, D.C.: Office of National Drug Control Policy; 2011.
32. Insulza JM. The drug problem in the Americas. Washington, DC: Organization of American States General Secretariat; 2013.
33. Harkinson J. Marijuana legalization may be unstoppable. Mother Jones. 2013 February 28.
34. EMCDDA. Drug Policy profiles: Portugal. Lisbon: European Monitoring Centre for Drugs and Drug Addiction; 2011.

Werb et al. Effectiveness of enforcement-based supply reduction...

35. Caulkins JP. Comment: Should the DEA's STRIDE data be used for economic analyses of markets for illegal drugs? *Journal of the American Statistical Association*. 2001; **96**(456): 1263-4.
36. Manski CF, Pepper J, Petrie C. *Informing America's policy on illegal drugs: What we don't know keeps hurting us*: National Academies Press; 2001.
37. Longo MC, Henry-Edwards SM, Humeniuk RE, Christie P, Ali RL. Impact of the heroin 'drought' on patterns of drug use and drug-related harms. *Drug Alc Rev*. 2004; **23**(2): 143-50.
38. EMCDDA. *Europol 2010 annual report on the implementation of council decision 2005/387/JHA*. Lisbon: European Monitoring Centre for Drugs and Drug Addiction; 2010.
39. Global Commission on Drug Policy. *The War on Drugs and HIV/AIDS: How the criminalization of drug use fuels the global pandemic*. Rio de Janeiro: Global Commission on Drug Policy; 2012.
40. Global Commission on Drug Policy. *Report of the Global Commission on Drug Policy*. Rio de Janeiro: Global Commission on Drug Policy; 2010.

Werb et al. Effectiveness of enforcement-based supply reduction...

**Table 1: Major Illegal Drug Data Surveillance Systems**

| Surveillance system                         | Country/Region | Inception Date | Illegal drugs considered |         |        | Outcomes considered |        |     |          | Summary of findings                                                                                                                |
|---------------------------------------------|----------------|----------------|--------------------------|---------|--------|---------------------|--------|-----|----------|------------------------------------------------------------------------------------------------------------------------------------|
|                                             |                |                | cannabis                 | cocaine | heroin | Price               | Purity | Use | Seizures |                                                                                                                                    |
| University of Mississippi Marijuana Project | USA            | 1975 -         | X                        |         |        |                     | X      |     |          | Cannabis potency increased between 1990 and 2009.                                                                                  |
| STRIDE Surveillance System                  | USA            | 1986-          | X                        | X       | X      | X                   | X      |     |          | Price decreased and purity/potency increased across all illegal drugs considered.                                                  |
| UNODC Drug Seizures Database                | International  | 1980 -         | X                        | X       | X      |                     |        |     | X        | Seizures of all drugs have increased between 1995 and 2006.                                                                        |
| UNODC Annual Reports Questionnaire          | International  | 1990 -         | X                        | X       | X      | X                   | X      | X   |          | Prices of opiates, cocaine, and cannabis have generally decreased in Europe and the US while purity and potency have increased.    |
| Reitox (EMCDDA database)                    | Europe         | 1993 -         | X                        | X       | X      | X                   |        |     | X        | Price of all illegal substances decreased in 2002 to 2007. Cocaine, cannabis, and heroin seizures increased between 2002 and 2007. |
| Illicit Drug Reporting System               | Australia      | 2000 -         | X                        | X       | X      | X                   | X      |     | X        | Between 2000 and 2010, the price of cocaine, cannabis and heroin decreased, while perceived purity remained stable.                |
| National Drug Threat Assessment             | USA            | 2001 -         | X                        | X       | X      | X                   |        |     | X        | Between 2005 and 2009, cocaine purity decreased whereas price increased.                                                           |

Note: STRIDE: System To Retrieve Information from Drug Evidence, EU = European Union, EC = European Commission; EMCDDA = European Monitoring Centre For Drugs and Drug Addiction; UNODC = United Nations Office of Drug Control

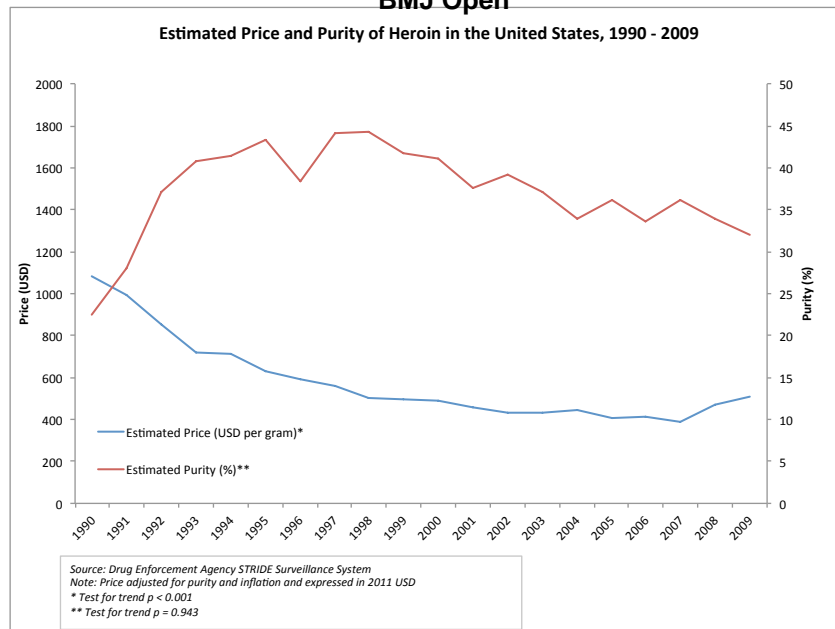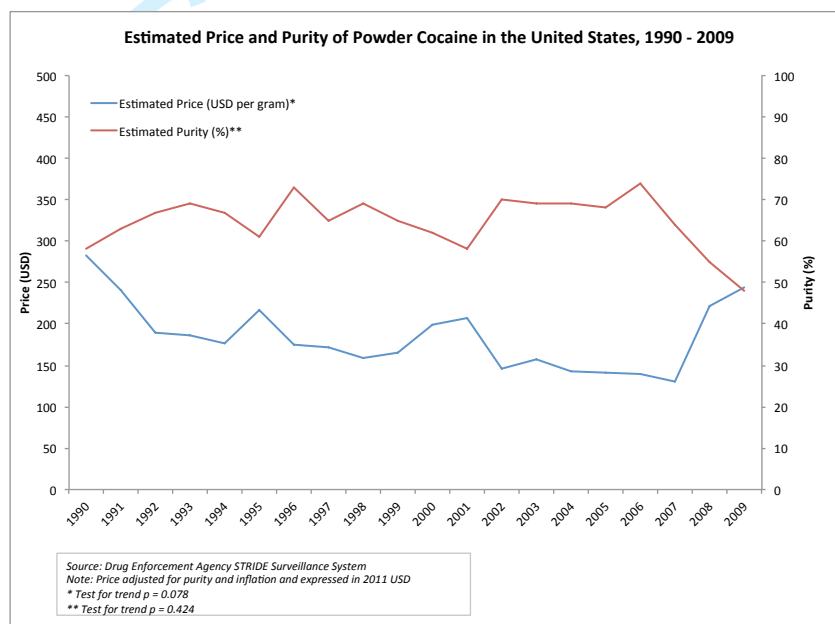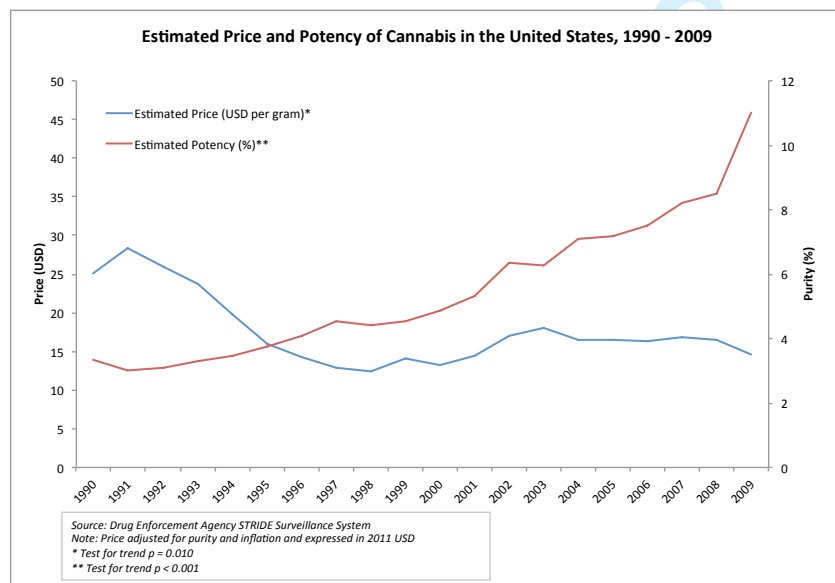

**Figure 1. Estimated Price and Purity of Heroin, Cocaine and Cannabis in the United States, 1990 – 2009**

For peer review only: <http://bmjopen.bmj.com/site/about/guidelines.xhtml>

1  
2  
3  
4  
5  
6  
7  
8  
9  
10  
11  
12  
13  
14  
15  
16  
17  
18  
19  
20  
21  
22  
23  
24  
25  
26  
27  
28  
29  
30  
31  
32  
33  
34  
35  
36  
37  
38  
39  
40  
41  
42  
43  
44  
45  
46  
47  
48  
49  
50  
51  
52  
53  
54  
55  
56  
57  
58  
59  
60

Werb et al. Effectiveness of enforcement-based supply reduction...

# The temporal relationship between drug supply indicators: An audit of international government surveillance systems

Dan Werb; Thomas Kerr; Bohdan Nosyk; Steffanie Strathdee; Julio Montaner; Evan Wood

**Dan Werb**, Senior Research Assistant, Urban Health Research Initiative, BC Centre for Excellence in HIV/AIDS, Vancouver, Canada, 608 – 1081 Burrard Street, Vancouver, B.C., Canada, V6Z 1Y6

**Thomas Kerr**, Director, Urban Health Research Initiative, BC Centre for Excellence in HIV/AIDS, Vancouver, Canada, 608 – 1081 Burrard Street, Vancouver, B.C., Canada, V6Z 1Y6

**Bohdan Nosyk**, Research Scientist, BC Centre for Excellence in HIV/AIDS, Vancouver, Canada, 608 – 1081 Burrard Street, Vancouver, B.C., Canada, V6Z 1Y6

**Steffanie Strathdee**, Associate Dean of Global Health Sciences, University of California San Diego, Institute of the Americas, 10111 N. Torrey Rd., La Jolla, CA, USA, 92093-0507

**Julio Montaner**, Director, BC Centre for Excellence in HIV/AIDS, Vancouver, Canada, 608 – 1081 Burrard Street, Vancouver, B.C., Canada, V6Z 1Y6

**Evan Wood**, Director, Urban Health Research Initiative, BC Centre for Excellence in HIV/AIDS, Vancouver, Canada, 608 – 1081 Burrard Street, Vancouver, B.C., Canada, V6Z 1Y6

**Send correspondence to:** Evan Wood, MD, PhD ABIM FRCPC  
Professor of Medicine, University of British Columbia  
BC Centre for Excellence in HIV/AIDS  
608-1081 Burrard Street, Vancouver, B.C. V6Z 1Y6  
CANADA  
Tel: (604) 806-9116  
Fax: (604) 806-9044  
Email: uhri-ew@cfenet.ubc.ca

**Word Count:** 2,575



1  
2  
3  
4  
5  
6  
7  
8  
9  
10  
11  
12  
13  
14  
15  
16  
17  
18  
19  
20  
21  
22  
23  
24  
25  
26  
27  
28  
29  
30  
31  
32  
33  
34  
35  
36  
37  
38  
39  
40  
41  
42  
43  
44  
45  
46  
47  
48  
49  
50  
51  
52  
53  
54  
55  
56  
57  
58  
59  
60

Werb et al. Effectiveness of enforcement-based supply reduction...

**Tables:** 1

**Figures:** 4

**Revised:** July 17, 2013

**Printed:** July 17, 2013

For peer review only

## ABSTRACT

**Objectives:** Illegal drug use continues to be a major threat to community health and safety. We used international drug surveillance databases to assess the relationship between multiple long-term estimates of illegal drug price and purity.

**Design:** We systematically searched for longitudinal measures of illegal drug supply indicators to assess the long-term impact of enforcement-based supply reduction interventions.

**Setting:** Data from identified illegal drug surveillance systems were analysed using an *a priori* defined protocol in which we sought to present annual estimates beginning in 1990. Data were then subjected to trend analyses.

**Main Outcome Measures:** Data were obtained from government surveillance systems assessing price, purity, and/or seizure quantities of illegal drugs; systems with at least 10 years of longitudinal data assessing price, purity/potency, or seizures were included.

**Results:** We identified 7 regional/international meta-surveillance systems with longitudinal measures of price or purity/potency that met eligibility criteria. In the United States, the average inflation- and purity-adjusted prices of heroin, cocaine, and cannabis decreased by 81%, 80% and 86% respectively between 1990 and 2007, whereas average purity increased by 60%, 11%, and 161% respectively. Similar trends were observed in Europe, where during the same period the average inflation-adjusted price of opiates and cocaine decreased by 74% and 51% respectively. In Australia, the average inflation-adjusted price of cocaine decreased 14%, while the inflation-adjusted price of heroin and cannabis both decreased 49% between 2000 and 2010. During this time, seizures of these drugs in major production regions and major domestic markets generally increased.

**Conclusions:** With few exceptions and despite increasing investments in enforcement-based supply reduction efforts aimed at disrupting global drug supply, illegal drug prices have generally decreased while drug purity has generally increased since 1990. These findings suggest that expanding efforts at controlling the global illegal drug market through law enforcement are failing.

Word count: 298

1  
2  
3  
4  
5  
6  
7  
8  
9  
10  
11  
12  
13  
14  
15  
16  
17  
18  
19  
20  
21  
22  
23  
24  
25  
26  
27  
28  
29  
30  
31  
32  
33  
34  
35  
36  
37  
38  
39  
40  
41  
42  
43  
44  
45  
46  
47  
48  
49  
50  
51  
52  
53  
54  
55  
56  
57  
58  
59  
60

Werb et al. Effectiveness of enforcement-based supply reduction...

## Article Summary

### Article focus

- Studies have demonstrated that illegal drug use remains a threat to community health and safety.
- However, less is known regarding the long-term impact of efforts to reduce the overall supply of illegal drugs.

### Key messages

- Using longitudinal governmental surveillance data, this study demonstrates that over the past two decades, the supply of major illegal drugs has increased, as measured through a general decline in the price, and a general increase in the purity of illegal drugs in a variety of settings.

### Strengths and limitations

- This study was limited by the quality and consistency of surveillance data on illegal drug supply
- This study presents data on trends in illegal drug supply in a variety of settings over two decades, including consumer and export drug markets

Werb et al. Effectiveness of enforcement-based supply reduction...

## OBJECTIVES

The United Nations (UN) recently estimated that the global illegal drug trade is worth at least \$350 billion USD annually,<sup>1</sup> and illegal drug use remains a major threat to community health and safety.<sup>2,3</sup> In addition to the range of harms associated with the direct health effects of drugs, including fatal overdose,<sup>4,5</sup> illegal drug use is also one of the key global drivers of blood borne disease transmission, in particular human immunodeficiency virus (HIV) infection.<sup>6,7</sup> Illegal drug markets also contribute to community concerns such as high rates of violence in settings where the trade proliferates.<sup>8</sup>

In response to the health and social concerns associated with illegal drug use, several UN conventions were created to control the possession, consumption, and manufacture of illegal drugs.<sup>9-11</sup> As a result, over the last several decades, most national drug control strategies have prioritized drug law enforcement interventions to reduce drug supply, despite recent calls by experts to explore alternative models of drug control such as systems of drug decriminalization and legal regulation.<sup>12-14</sup> Some unintended consequences of this approach, such as record incarceration rates, have been well-documented.<sup>15-18</sup> Additionally, a small number of studies assessing aspects of drug supply, measured through indicators of drug price, purity/potency and seizures, have been undertaken to describe the global relationship between these indicators over the long-term.<sup>19</sup> However, systematic evaluation of these relationships is still needed to elucidate patterns of drug supply. The present study therefore sought

1 *Werb et al. Effectiveness of enforcement-based supply reduction...*

2 to systematically identify international data from publicly available illegal drug  
3 surveillance systems to assess long-term estimates of illegal drug supply.  
4  
5  
6

## 7 DESIGN

### 8 *Outcomes of interest*

9  
10 The primary outcomes of interest were long-term patterns of illegal drug  
11 supply, measured through indicators of price and purity/potency for three major  
12 illegal drugs: cannabis, cocaine, and opiates (e.g., opium and heroin). While data  
13 on amphetamine-type stimulants exist in some specific countries (e.g., the United  
14 Kingdom), this class of drugs was not included given inconsistent data collection  
15 and classification, and fluctuating surveillance periods and overall data quality.  
16  
17 A secondary outcome of interest was data on illegal drug seizures in a) major  
18 illegal drug source regions and, b) major destination markets, as identified by the  
19 United Nations Office on Drugs and Crime (UNODC).<sup>20</sup> These secondary  
20 outcome data were used as an additional proxy measure to assess the availability  
21 of illegal drugs in specific regions, as has been done previously.<sup>21, 22</sup> All outcomes  
22 were systematically identified through publicly available illegal drug  
23 surveillance systems. Linear by linear association trend tests were carried out on  
24 **annual** estimates of all outcomes of interest. **Price and purity estimates**  
25 **represent median values for each year, while estimates for seizures represent**  
26 **crude totals of quantity seized.** All price estimates are expressed in 2011 USD  
27 and are, where possible, adjusted for purity.<sup>23</sup>  
28  
29  
30  
31  
32  
33  
34  
35  
36  
37  
38  
39  
40  
41  
42  
43  
44  
45  
46  
47  
48  
49  
50  
51  
52  
53  
54

### 55 *Illegal drug surveillance systems*

Werb et al. Effectiveness of enforcement-based supply reduction...

1  
2  
3 An online search of surveillance systems monitoring illegal drugs using  
4  
5 two *a priori* defined inclusion criteria was carried out. **Search terms included:**  
6  
7 **drugs, illicit, illegal, price, purity, potency, surveillance system, government**  
8  
9 **data, longitudinal, annual, estimate. Inclusion/exclusion criteria were as**  
10  
11 **follows: only surveillance systems that included continuous longitudinal**  
12  
13 **assessments of these outcomes of interest for at least 10 years were included**  
14  
15 **because we specifically sought to assess the long-term impact of enforcement-**  
16  
17 **based supply reduction strategies on illegal drug price and purity/potency.**  
18  
19 **Finally, data extraction was restricted to 1990 and onwards to focus on patterns**  
20  
21 **of supply during recent decades.**

22  
23  
24  
25  
26  
27 Data were obtained through online searches of registries of surveillance  
28  
29 systems (e.g., governmental websites, United Nations databases),  
30  
31 governmental reports, and peer-reviewed publications, through referrals from  
32  
33 experts in the field, and through data requests to relevant organizations  
34  
35 including the UNODC. All authors had complete access to all data and all had  
36  
37 final responsibility to submit for publication. Ethics approval was not required  
38  
39 given that we relied exclusively on publicly available data.  
40  
41  
42  
43

## 44 RESULTS

45  
46 We identified 7 government surveillance systems that met inclusion  
47  
48 criteria. Of these, 3 (43%) reported on international data, 3 (43%) reported on data  
49  
50 from the United States (US), and 1 (14%) reported on data from Australia. One of  
51  
52 the longest-running surveillance system identified, the US-based Marijuana  
53  
54 Potency Monitoring Project, is funded by the U.S. National Institutes of Health  
55  
56  
57  
58  
59  
60

Werb et al. Effectiveness of enforcement-based supply reduction...

1  
2  
3 and was established in 1975, while the most recent surveillance system was  
4  
5 established in 2001 (e.g., the US-based *National Drug Threat Assessment*). With  
6  
7 respect to international surveillance systems, the UNODC administers two  
8  
9 separate surveillance systems that collect data from all participating United  
10  
11 Nations member states: the Annual Reports Questionnaire surveillance system  
12  
13 that collects price and purity/potency data, and the Drug Seizures Database that  
14  
15 collects seizure data. Finally, the European Monitoring Centre for Drugs and  
16  
17 Drug Addiction administers the Reitox drug surveillance system network, which  
18  
19 aggregates data from a number of country-level surveillance systems in Europe,  
20  
21 as described below.<sup>24</sup>

### 22 23 24 25 26 27 **Price and Purity/Potency**

28  
29  
30 Table 1 presents surveillance systems that matched search criteria. An  
31  
32 assessment of data provided by these surveillance systems demonstrated a  
33  
34 number of broad trends. First, purity and/or potency of illegal drugs generally  
35  
36 remained stable or increased overall during the study period. Second, the price  
37  
38 of illegal drugs, with few exceptions, generally decreased. Third, seizures of  
39  
40 cannabis, cocaine and opiates generally increased in major drug production  
41  
42 regions and major domestic markets.

43  
44  
45  
46  
47 Figure 1 presents data from the US Drug Enforcement Administration's  
48  
49 System To Retrieve Information from Drug Evidence (STRIDE). As can be seen,  
50  
51 between 1990 and 2007 (the last year for which data are publicly available), the  
52  
53 purity of heroin and cocaine, and the potency of cannabis herb in the US  
54  
55 increased, while the inflation- and purity-adjusted retail street prices of these  
56  
57  
58  
59  
60

1 *Werb et al. Effectiveness of enforcement-based supply reduction...*

2 three drugs declined.<sup>25</sup> Specifically, heroin purity increased by 60% ( $p = 0.568$ ),  
3  
4 cocaine purity increased by 11% ( $p = 0.181$ ), and cannabis herb potency increased  
5  
6 by 161% ( $p < 0.001$ ) during this time. During the same period, the prices of  
7  
8 heroin, cocaine, and cannabis decreased 81% ( $p < 0.001$ ), 80% ( $p < 0.001$ ), and 86%  
9  
10 ( $p < 0.001$ ) respectively.  
11  
12

13  
14  
15 Figure 2 presents data collected by the UNODC on the street price of  
16 cocaine and opiates in participating European countries (i.e., Austria, Belgium,  
17 Denmark, Finland, France, Germany, Greece, Italy, Luxembourg, Netherlands,  
18 Norway, Iceland, Portugal, Spain, Sweden, Switzerland, United Kingdom, and  
19 Ireland).<sup>26</sup> In these countries, between 1990 and 2009, the aggregate average retail  
20 street price of cocaine decreased by 51%, from \$198 USD per gram to \$98 USD  
21 per gram ( $p < 0.001$ ). Similarly, the aggregate average price of opiates in Europe  
22 decreased 74%, from a high of \$295 USD per gram in 1990 to \$77 USD per gram  
23 in 2009 ( $p < 0.001$ ).  
24  
25  
26  
27  
28  
29  
30  
31  
32  
33  
34  
35  
36

37 Data from the Australian Illicit Drug Reporting System (IDRS) were  
38 available from 2000 to 2010. IDRS data suggest that the price of illegal drugs in  
39 Australia fluctuated substantially during this period. Specifically, after  
40 adjustment, the price of heroin decreased by 49%, from approximately \$460 USD  
41 per gram to approximately \$235 per gram ( $p < 0.001$ ), despite the well-described  
42 heroin 'drought' of 2001,<sup>27</sup> which saw a reduction in the supply and availability  
43 of heroin in Australia. Additionally, the price of cocaine decreased 14% from  
44 approximately \$255 AUD per gram to \$220 AUD per gram ( $p = 0.477$ ), and the  
45  
46  
47  
48  
49  
50  
51  
52  
53  
54  
55  
56  
57  
58  
59  
60



1 *Werb et al. Effectiveness of enforcement-based supply reduction...*

2 price of cannabis decreased 49% from approximately \$25 AUD per gram to \$13  
3  
4 AUD per gram ( $p < 0.001$ ).<sup>28</sup>

## 7 *Seizures*

### 9 *Domestic Markets*

10  
11  
12 Figure 3 presents data on cannabis and cocaine seizures in the US between  
13 1990 and 2010. As shown, data from the US Drug Enforcement Administration's  
14 STRIDE surveillance system demonstrate that the amount of cannabis herb  
15 seized by the Drug Enforcement Administration both in, and destined for, the US  
16 rose 465%, from approximately 130,000 kilograms in 1990 to approximately  
17 720,000 kilograms in 2010 ( $p < 0.001$ ). During this same period, despite  
18 fluctuations, the amount of cocaine seized by the US Drug Enforcement  
19 Administration decreased 49%, from approximately 57,000 kilograms in 1990 to  
20 29,000 in 2010 ( $p = 0.409$ ), while the amount of heroin seized increased 29% from  
21 approximately 535 kilograms in 1990 to 690 kilograms ( $p = 0.979$ , heroin seizure  
22 data not shown).<sup>29</sup>

23  
24  
25  
26  
27  
28  
29  
30  
31  
32  
33  
34  
35  
36  
37  
38  
39  
40  
41  
42 Figure 4 presents data on cannabis, cocaine and heroin seizures in  
43 countries participating in the European Monitoring Centre for Drugs and Drug  
44 Addiction's Reitox surveillance network (i.e., European Union member  
45 countries, as well as Croatia, Norway, and Turkey), between 1995 and 2009. As  
46 can be seen, annual estimates of the quantity of both cocaine and cannabis herb  
47 seized fluctuated throughout this period; however, the quantity of heroin seized  
48 increased relatively steadily. Specifically, the number of kilograms of cannabis  
49 herb seized was at a low of approximately 57,000 kilograms in 1995, and peaked  
50  
51  
52  
53  
54  
55  
56  
57  
58  
59  
60

1 *Werb et al. Effectiveness of enforcement-based supply reduction...*

2 one year later in 1996 at approximately 138,000 kilograms ( $p = 0.446$ ). The  
3  
4 number of cocaine seizures was at a low of approximately 21,000 kilograms in  
5  
6  
7  
8 1995, and peaked at approximately 121,000 kilograms in 2006 ( $p = 0.018$ ). Finally,  
9  
10 the number of kilograms of heroin seized increased 380% from a low of  
11  
12 approximately 5,000 in 1995 to a high of approximately 24,000 in 2009 ( $p < 0.001$ ).  
13

#### 14 *Production Regions*

15  
16  
17 With respect to opiate seizures, the Golden Triangle includes parts of  
18  
19 Thailand, Lao, Viet Nam and Myanmar, and according to the UNODC, this  
20  
21 region is the second largest supplier of heroin globally, though production has  
22  
23 declined throughout the last decade, with opium production decreasing by  
24  
25 approximately 60% and 90% in Myanmar and Lao, respectively.<sup>30</sup> In this region,  
26  
27 trends in seizures of opium have fluctuated; 3,198 kilograms of opium were  
28  
29 seized in 1990, with a high of 12,462 kilograms seized in 2007 before a steep  
30  
31 decline to 1,225 kilograms in 2010 ( $p = 0.856$ ). Similarly, seizures of heroin  
32  
33 fluctuated, with a decrease of more than half, from 1,337 kilograms in 1990, to  
34  
35 627 kilograms in 2010 ( $p = 0.085$ ), and a peak of 1,565 kilograms seized in 2009. In  
36  
37 Afghanistan, which is believed to supply over 90% of the world's opium,<sup>30</sup>  
38  
39 seizures of raw and prepared opium increased by over 12,000%, from 453  
40  
41 kilograms in 1990 to 57,023 kilograms in 2010, and seizures of heroin increased  
42  
43 by over 600%, from 1,256 kilograms in 1990 to 9,036 kilograms in 2010 (Note:  
44  
45 missing data prevented a trend test for annual opium and heroin seizures in  
46  
47  
48  
49  
50  
51  
52  
53  
54  
55  
56  
57  
58  
59  
60 Afghanistan).

1  
2  
3  
4  
5  
6  
7  
8  
9  
10  
11  
12  
13  
14  
15  
16  
17  
18  
19  
20  
21  
22  
23  
24  
25  
26  
27  
28  
29  
30  
31  
32  
33  
34  
35  
36  
37  
38  
39  
40  
41  
42  
43  
44  
45  
46  
47  
48  
49  
50  
51  
52  
53  
54  
55  
56  
57  
58  
59  
60

*Werb et al. Effectiveness of enforcement-based supply reduction...*

With respect to cocaine seizures, according to the UNODC, Latin America's Andean region, which includes Peru, Bolivia, and Colombia, is the primary global supplier of this drug, as coca leaf is grown exclusively in this region.<sup>31</sup> While seizures of cocaine in the Andean region decreased 81%, from 97,437 kilograms in 1990 to 17,835 kilograms in 2007 ( $p = 0.028$ ), seizures of coca leaf increased 188% from 601,038 kilograms in 1990 to 1.73 million kilograms in 2007 ( $p = 0.004$ ). During the same period, the area of coca cultivation in this region declined slightly, from approximately 210,000 hectares to 180,000 hectares ( $p = 0.004$ ).

Finally, according to the UNODC, major areas of cannabis cultivation exist in North Africa, Afghanistan, and North America. These areas are net exporters of cannabis, though most cannabis-producing countries also produce the drug for internal consumption.<sup>20</sup> In North Africa (i.e., Algeria, Morocco, and Tunisia), seizures of cannabis herb increased by 208% from 67,930 kilograms in 1990 to 209,445 kilograms in 2007 ( $p = 0.015$ ). In North America (i.e., Canada, the United States, and Mexico), seizures of cannabis herb increased by 288% from 782,607 kilograms in 1990 to 3.05 million kilograms in 2007 ( $p < 0.001$ ). In Afghanistan, while data on cannabis herb seizures are not available, seizures of cannabis resin increased 630% from 5,068 kilograms in 1990 to 36,972 kilograms in 2006 ( $p = 0.061$ ).

## CONCLUSIONS

Longitudinal data from government surveillance systems demonstrate that over the past two decades there has been a general pattern of increased

*Werb et al. Effectiveness of enforcement-based supply reduction...*

1  
2  
3 illegal drug supply as defined through lower price and higher purity of heroin,  
4  
5 cocaine and cannabis. During the same period, patterns of drug seizures either  
6  
7 increased or remained stable, though the trends detected in some of these  
8  
9 indicators did not reach statistical significance. As such, we conclude, consistent  
10  
11 with previous studies,<sup>19</sup> that the global supply of illicit drugs has likely not been  
12  
13 reduced in the previous two decades. In particular, the data presented in this  
14  
15 study suggest that the supply of opiates and cannabis, in particular, have  
16  
17 increased, given the increasing potency and decreasing prices of these illegal  
18  
19 commodities. These results have implications for the development of evidence-  
20  
21 based drug policies, particularly given the interest in novel drug policy  
22  
23 approaches in a number of settings in Latin America, North America, and  
24  
25 Europe.<sup>32-34</sup>

26  
27  
28  
29  
30  
31  
32 As noted elsewhere,<sup>35, 36</sup> there are limitations of ecologic analyses based on  
33  
34 international surveillance systems. First, some states collect little or no data on  
35  
36 indicators of illegal drug supply, whereas other states spend significant energy  
37  
38 on monitoring drug availability. Second, even in states that closely track  
39  
40 indicators of supply, the degree to which seized samples of illegal drugs reflect  
41  
42 purity of retail drugs sold on the street is subject to variation, though where  
43  
44 possible we presented purity-adjusted prices to address this limitation.<sup>23</sup>  
45  
46  
47  
48  
49 Nevertheless, the long-term trends in increasing purity and decreasing price  
50  
51 presented here likely reflect overall trends in many regions, though it should be  
52  
53 noted that in some regions (e.g., Europe), indicators of price and purity may have  
54  
55 been strongly influenced by a few countries such as the United Kingdom and  
56  
57  
58  
59  
60

*Werb et al. Effectiveness of enforcement-based supply reduction...*

1  
2  
3 Spain. Additionally, some exceptions in the trends were observed. Australia for  
4  
5 instance, while experiencing a significant decrease in the prices of both heroin  
6  
7 and cannabis, did not experience a significant decrease in the price of cocaine,  
8  
9 which may reflect the geographic isolation of the region or other market factors.  
10  
11 It is also of note that Australia's 'heroin drought',<sup>37</sup> which saw a sudden drop in  
12  
13 measures of the supply and availability of heroin, appears to have had a limited  
14  
15 long-term impact on supply, though some experts suggest that it may have  
16  
17 resulted in higher levels of polysubstance use among Australian heroin  
18  
19 injectors.<sup>27</sup> Third, limitations in longitudinal data collection precluded our ability  
20  
21 to include amphetamine-type stimulants and other emerging synthetic  
22  
23 substances, as this data is limited to certain countries and the focus of this study  
24  
25 was on regional trends. It is noteworthy in this regard that the production of  
26  
27 synthetic substances – as well as indoor cannabis cultivation – present particular  
28  
29 challenges for supply reduction strategies, given that these drugs can be mass  
30  
31 produced in clandestine locations regardless of climate or other factors that limit  
32  
33 traditional drug production.<sup>20, 38</sup> Finally, while this review focused on patterns of  
34  
35 price and purity of selected illegal drugs, these measures are only a marker of  
36  
37 drug supply, and do not measure other factors determining availability and  
38  
39 concomitant rates of drug use. These limitations to assessing global drug supply  
40  
41 using classic proxy measures such as price, purity, and, to a lesser extent,  
42  
43 seizures, suggests that there may be a need to expand the range of measures  
44  
45 systematically collected by governments and international bodies such as the  
46  
47 UNODC and the European Monitoring Centre for Drugs and Drug Addiction. In  
48  
49  
50  
51  
52  
53  
54  
55  
56  
57  
58  
59  
60

*Werb et al. Effectiveness of enforcement-based supply reduction...*

1  
2  
3 particular, meaningfully incorporating measures derived from street-level  
4  
5 questionnaires of people who use drugs may provide a more reliable metric of  
6  
7 supply and availability. Indeed, some bodies, such as Australia's IDRS, collect  
8  
9 such data,<sup>28</sup> and this methodological approach should be considered by those  
10  
11 coordinating surveillance of illegal drugs. Other bodies have also prioritized  
12  
13 emphasizing measures of community health including reduced HIV infections,  
14  
15 reduced drug-related violence and reductions in numbers of individuals  
16  
17 incarcerated.<sup>39, 40</sup>  
18  
19  
20  
21

22  
23 In summary, longitudinal illegal drug surveillance systems demonstrate a  
24  
25 general global pattern of falling drug prices and increasing drug purity and  
26  
27 potency, alongside a relatively consistent pattern of increasing seizures of illegal  
28  
29 drugs. Although source data have limitations and there are some exceptions to  
30  
31 these trends, these findings should be useful given the current debates and drug  
32  
33 policy experimentation under way in Latin America, North America, and  
34  
35 Europe.<sup>32-34</sup> It is hoped that this study highlights the need to re-examine the  
36  
37 effectiveness of national and international drug strategies that place a  
38  
39 disproportionate emphasis on supply reduction at the expense of evidence-based  
40  
41 prevention and treatment of problematic illegal drug use.  
42  
43  
44  
45  
46  
47  
48  
49  
50  
51  
52  
53  
54  
55  
56  
57  
58  
59  
60

1  
2  
3  
4  
5  
6  
7  
8  
9  
10  
11  
12  
13  
14  
15  
16  
17  
18  
19  
20  
21  
22  
23  
24  
25  
26  
27  
28  
29  
30  
31  
32  
33  
34  
35  
36  
37  
38  
39  
40  
41  
42  
43  
44  
45  
46  
47  
48  
49  
50  
51  
52  
53  
54  
55  
56  
57  
58  
59  
60

Werb et al. Effectiveness of enforcement-based supply reduction...

### **Acknowledgments:**

The authors would like to thank Deborah Graham, Peter Vann, Katherine Quayle, Samantha MacLean, and Kevin Lutz for their administrative assistance. Dan Werb is supported by the Canadian Institutes of Health Research. Thomas Kerr is supported by the Canadian Institutes of Health Research and the Michael Smith Foundation for Health Research.

### **Competing interests:**

All authors declare that (1) DW, TK, BN, JM and EW have support from the BC Centre for Excellence in HIV/AIDS for their submitted work; SS has support from the Division of Global Public Health, Department of Medicine, University of California, San Diego; (2) DW, TK, BN, SS, and EW have no relationships with companies that might have an interest in the submitted work in the previous 3 years; (3) their spouses, partners, or children have no financial relationships that may be relevant to the submitted work; and (4) DW, TK, BN, SS and EW have no non-financial interests that may be relevant to the submitted work. JM has received grants from, served as an ad hoc adviser to, or spoken at events sponsored by Abbott, Argos Therapeutics, Bioject Inc., Boehringer Ingelheim, BMS, Gilead Sciences, GlaxoSmithKline, Hoffmann-La Roche, Janssen-Ortho, Merck Frosst, Panacos, Pfizer Ltd., Schering, Serono Inc., TheraTechnologies, Tibotec (J&J), and Trimeris.

Werb et al. Effectiveness of enforcement-based supply reduction...

## References:

1. Pietschmann T, Walker J. Estimating illicit financial flows resulting from drug trafficking and other transnational organized crimes. Vienna: UNODC Studies and Threat Analysis Section, Division for Policy Analysis and Public Affairs; 2011.
2. Jurgens R, Ball A, Verster A. Interventions to reduce HIV transmission related to injecting drug use in prison. *Lancet Infect Dis.* 2009; **9**(1): 57-66.
3. Beyrer C, Malinowska-Sempruch K, Kamarulzaman A, Kazatchkine M, Sidibe M, Strathdee SA. Time to act: A call for comprehensive responses to HIV in people who use drugs *The Lancet.* 2010; **376**(9740): 551-63.
4. Coffin PO, Galea S, Ahern J, Leon AC, Vlahov D, Tardiff K. Opiates, cocaine, and alcohol combinations in accidental drug overdose deaths in New York City, 1990-98. *Addiction.* 2003; **98**(6): 739.
5. Garfield J, Drucker E. Fatal overdose trends in major US cities: 1990 - 1997. *Addictions Research and Theory.* 2001; **9**(5): 425.
6. Mathers BM, Degenhardt L, Phillips B, Wiessing L, Hickman M, Strathdee SA, et al. Global epidemiology of injecting drug use and HIV among people who inject drugs: A systematic review. *Lancet.* 2008; **372**(9651): 1733-45.
7. Shepard CW, Finelli L, Alter MJ. Global epidemiology of hepatitis C virus infection. *Lancet Infect Dis.* 2005; **5**(9): 558-67.
8. Werb D, Rowell G, Guyatt G, Kerr T, Montaner J, Wood E. Effect of drug law enforcement on drug market violence: A systematic review. *Int J Drug Pol.* 2011; **22**(2): 8.
9. ECOSOC. Convention on Psychotropic Substances, 1971. Vienna: United Nations Economic and Social Council; 1971.
10. ECOSOC. The Single Convention on Narcotic Drugs, 1961. As amended by the 1972 Protocol amending the Single Convention on Narcotic Drugs, 1961. Vienna: United Nations Economic and Social Council; 1972.
11. ECOSOC. United Nations Convention Against Illicit Traffic in Narcotic Drugs and Psychotropic Substances, 1988. Vienna: United Nations Economic and Social Council; 1988.



1  
2  
3  
4  
5  
6  
7  
8  
9  
10  
11  
12  
13  
14  
15  
16  
17  
18  
19  
20  
21  
22  
23  
24  
25  
26  
27  
28  
29  
30  
31  
32  
33  
34  
35  
36  
37  
38  
39  
40  
41  
42  
43  
44  
45  
46  
47  
48  
49  
50  
51  
52  
53  
54  
55  
56  
57  
58  
59  
60

Werb et al. Effectiveness of enforcement-based supply reduction...

12. Travis A. Home Office rejects decriminalising possession of drugs for personal use. *The Guardian*. 2011 October 14.
13. Hoeffel J. Federal crackdown on medical pot sales reflects a shift in policy. *Los Angeles Times*. 2011 October 7.
14. Greenwald G. Drug decriminalization in Portugal: Lessons for creating fair and successful drug policies. Washington, D.C.: Cato Institute; 2009.
15. Warren J, Gelb A, Horowitz J, Riordan J. One in 100: Behind bars in America 2008. Washington, D.C.: The Pew Center on the States; 2008.
16. Farrell G, Clark, K. What does the world spend on criminal justice? Helsinki: The European Institute for Criminal Prevention and Control, affiliated with the United Nations; 2004.
17. Walmsley R. World prison population list. Report. London: International Centre for Prison Studies; 2007.
18. UNODC. World Drug Report 2008. Vienna: United Nations Office on Drugs and Crime; 2008.
19. A report on global illicit drug markets, 1998-2007. Netherlands: European Commission Directorate-General on Justice, Freedom and Security; 2009.
20. UNODC. World Drug Report 2011. Vienna: United Nations Office on Drugs and Crime; 2011.
21. Roberts M, Bewley-Taylor DR, Trace M. Monitoring drug policy outcomes: the measurement of drug-related harm: Beckley Foundation Drug Policy Programme; 2006.
22. Lenke L. An analysis of the significance of supply and market factors for variations in European cannabis use. *EMCDDA Monographs*. 2008; 293.
23. Caulkins JP. Price and purity analysis for illicit drug: Data and conceptual issues. *Drug Alc Depend*. 2007; **90**: S61-S8.
24. Hartnoll R. Drug epidemiology in the European institutions: Historical background and key indicators. *Bulletin on Narcotics*. 2003; **55**(1): 53-72.
25. Fries A, Anthony RW, Cseko Jr. A, Gaither CC, Schulman E. The price and purity of illicit drugs: 1981 - 2007. Alexandria, VA: Institute for Defense Analyses; 2008.

Werb et al. Effectiveness of enforcement-based supply reduction...

- 1
  - 2
  - 3
  - 4
  - 5
  - 6
  - 7
  - 8
  - 9
  - 10
  - 11
  - 12
  - 13
  - 14
  - 15
  - 16
  - 17
  - 18
  - 19
  - 20
  - 21
  - 22
  - 23
  - 24
  - 25
  - 26
  - 27
  - 28
  - 29
  - 30
  - 31
  - 32
  - 33
  - 34
  - 35
  - 36
  - 37
  - 38
  - 39
  - 40
  - 41
  - 42
  - 43
  - 44
  - 45
  - 46
  - 47
  - 48
  - 49
  - 50
  - 51
  - 52
  - 53
  - 54
  - 55
  - 56
  - 57
  - 58
  - 59
  - 60
26. UNODC. World Drug Report 2010: Statistical Annex. Vienna: United Nations Office on Drugs and Crime; 2010.
27. Weatherburn D, Jones C, Freeman K, Makkai T. Supply control and harm reduction: lessons from the Australian heroin drought. *Addiction*. 2003; **98**: 83.
28. Stafford J, Burns L. Australian drug trends 2010: Findings from the Illicit Drug Reporting System (IDRS). Sydney: National Drug and Alcohol Research Centre; 2011.
29. DEA. STRIDE surveillance system. New York: United States Drug Enforcement Administration; 2011.
30. UNODC. World Drug Report 2010. Vienna: United Nations Office on Drugs and Crime; 2010.
31. ONDCP. Coca in the Andes. Washington, D.C.: Office of National Drug Control Policy; 2011.
32. Insulza JM. The drug problem in the Americas. Washington, DC: Organization of American States General Secretariat; 2013.
33. Harkinson J. Marijuana legalization may be unstoppable. *Mother Jones*. 2013 February 28.
34. EMCDDA. Drug Policy profiles: Portugal. Lisbon: European Monitoring Centre for Drugs and Drug Addiction; 2011.
35. Caulkins JP. Comment: Should the DEA's STRIDE data be used for economic analyses of markets for illegal drugs? *Journal of the American Statistical Association*. 2001; **96**(456): 1263-4.
36. Manski CF, Pepper J, Petrie C. Informing America's policy on illegal drugs: What we don't know keeps hurting us: National Academies Press; 2001.
37. Longo MC, Henry-Edwards SM, Humeniuk RE, Christie P, Ali RL. Impact of the heroin'drought'on patterns of drug use and drug-related harms. *Drug Alc Rev*. 2004; **23**(2): 143-50.
38. EMCDDA. Europol 2010 annual report on the implementation of council decision 2005/387/JHA. Lisbon: European Monitoring Centre for Drugs and Drug Addiction; 2010.

1  
2  
3  
4  
5  
6  
7  
8  
9  
10  
11  
12  
13  
14  
15  
16  
17  
18  
19  
20  
21  
22  
23  
24  
25  
26  
27  
28  
29  
30  
31  
32  
33  
34  
35  
36  
37  
38  
39  
40  
41  
42  
43  
44  
45  
46  
47  
48  
49  
50  
51  
52  
53  
54  
55  
56  
57  
58  
59  
60

*Werb et al. Effectiveness of enforcement-based supply reduction...*

39. Global Commission on Drug Policy. *The War on Drugs and HIV/AIDS: How the criminalization of drug use fuels the global pandemic*. Rio de Janeiro: Global Commission on Drug Policy; 2012.
40. Global Commission on Drug Policy. *Report of the Global Commission on Drug Policy*. Rio de Janeiro: Global Commission on Drug Policy; 2010.

For peer review only

Werb et al. Effectiveness of enforcement-based supply reduction...

**Table 1: Major Illegal Drug Data Surveillance Systems**

| Surveillance system                         | Country/Region | Inception Date | Illegal drugs considered |         |        | Outcomes considered |        |     |          | Summary of findings                                                                                                                |
|---------------------------------------------|----------------|----------------|--------------------------|---------|--------|---------------------|--------|-----|----------|------------------------------------------------------------------------------------------------------------------------------------|
|                                             |                |                | cannabis                 | cocaine | heroin | Price               | Purity | Use | Seizures |                                                                                                                                    |
| University of Mississippi Marijuana Project | USA            | 1975 -         | X                        |         |        |                     | X      |     |          | Cannabis potency increased between 1990 and 2009.                                                                                  |
| STRIDE Surveillance System                  | USA            | 1986-          | X                        | X       | X      | X                   | X      |     |          | Price decreased and purity/potency increased across all illegal drugs considered.                                                  |
| UNODC Drug Seizures Database                | International  | 1980 -         | X                        | X       | X      |                     |        |     | X        | Seizures of all drugs have increased between 1995 and 2006.                                                                        |
| UNODC Annual Reports Questionnaire          | International  | 1990 -         | X                        | X       | X      | X                   | X      | X   |          | Prices of opiates, cocaine, and cannabis have generally decreased in Europe and the US while purity and potency have increased.    |
| Reitox (EMCDDA database)                    | Europe         | 1993 -         | X                        | X       | X      | X                   |        |     | X        | Price of all illegal substances decreased in 2002 to 2007. Cocaine, cannabis, and heroin seizures increased between 2002 and 2007. |
| Illicit Drug Reporting System               | Australia      | 2000 -         | X                        | X       | X      | X                   | X      |     | X        | Between 2000 and 2010, the price of cocaine, cannabis and heroin decreased, while perceived purity remained stable.                |
| National Drug Threat Assessment             | USA            | 2001 -         | X                        | X       | X      | X                   |        |     | X        | Between 2005 and 2009, cocaine purity decreased whereas price increased.                                                           |

Note: STRIDE: System To Retrieve Information from Drug Evidence, EU = European Union, EC = European Commission; EMCDDA = European Monitoring Centre For Drugs and Drug Addiction; UNODC = United Nations Office of Drug Control

1  
2  
3  
4  
5  
6  
7  
8  
9  
10  
11  
12  
13  
14  
15  
16  
17  
18  
19  
20  
21  
22  
23  
24  
25  
26  
27  
28  
29  
30  
31  
32  
33  
34  
35  
36  
37  
38  
39  
40  
41  
42  
43  
44  
45  
46  
47  
48  
49  
50  
51  
52  
53  
54  
55  
56  
57  
58  
59  
60

Figure 2. Average Inflation-Adjusted Price of Opiates and Cocaine in Europe, 1990 - 2007



Source: United Nations Office on Drugs and Crime Annual Reports Questionnaire  
 Note: Price adjusted for CPI inflation  
 \* Test for trend:  $p < 0.001$   
 \*\* Test for trend:  $p < 0.001$

view only

1  
2  
3  
4  
5  
6  
7  
8  
9  
10  
11  
12  
13  
14  
15  
16  
17  
18  
19  
20  
21  
22  
23  
24  
25  
26  
27  
28  
29  
30  
31  
32  
33  
34  
35  
36  
37  
38  
39  
40  
41  
42  
43  
44  
45  
46  
47  
48  
49  
50  
51  
52  
53  
54  
55  
56  
57  
58  
59  
60



Review only

Figure 4. Cocaine, Cannabis and Heroin Seizures in Europe\*, 1990 - 2010



Source: European Monitoring Centre for Drugs and Drug Addiction REITOX Network  
 \* Refers to European Union member countries, Croatia, Norway, and Turkey  
 \*\* Test for trend:  $p = 0.018$   
 † Test for trend:  $p = 0.446$   
 ‡ Test for trend:  $p < 0.001$

only
